# Supplementary material for: Cost of Dengue Illness in Indonesia across Hospital, Ambulatory, and not Medically Attended Settings
Source: PubMed Central journal article supplement (PMC7646801; doi:10.4269/ajtmh.19-0855), 2020-09-08
Supplement: tpmd190855.SD1.pdf [file tpmd190855.SD1.pdf]

## Supplementary Information

### Cost of dengue illness in Indonesia across hospital, ambulatory and non-medical settings

Nandyan N. Wilastonegoro, Dinar D. Kharisma, Ida S. Laksono, Yara A. Halasa-Rappel, Oliver J.

Brady, Donald S. Shepard

#### Contents

- S1: Questionnaire S1. Adult questionnaire in English
- S2: Questionnaire S2. Adult questionnaire in Bahasa Indonesia
- S3: Questionnaire S3. Pediatric questionnaire (patients under age 18) in English
- S4: Questionnaire S4. Pediatric questionnaire (patients under age 18) in Bahasa Indonesia
- S5: Table S5. Studies on cost of a dengue episode in the literature by country
- S6: Table S6. Studies on cost of a dengue episode in the literature by region
- S7: Table S7. Dengue economic burden by type of case and source of financing (in millions of 2017 US\$)
- S8: Figure S8. Histogram of direct medical cost per hospitalized case in Yogyakarta, Indonesia (n=20)
- S9: Figure S9. Histogram of non-medical cost per hospitalized case in Yogyakarta, Indonesia (n=20)
- S10: Figure S10. Histogram of indirect cost per hospitalized case in Yogyakarta, Indonesia (n=20)
- S11: Figure S11. Histogram of total cost per hospitalized case in Yogyakarta, Indonesia (n=20)

## **Supplementary Information**

### **Cost of dengue illness in Indonesia across hospital, ambulatory and non-medical settings**

#### Questionnaire Contents

- S1: Questionnaire S1. Adult questionnaire in English
- S2: Questionnaire S2. Adult questionnaire in Bahasa Indonesia
- S3: Questionnaire S3. Pediatric questionnaire (patients under age 18) in English
- S4: Questionnaire S4. Pediatric questionnaire (patients under age 18) in Bahasa Indonesia

## **Supplementary Information**

### **Cost of dengue illness in Indonesia across hospital, ambulatory and non-medical settings**

S1: Questionnaire S1. Adult questionnaire in English

Adult Confirmed Dengue Patient Questionnaire (Age 18+)

Patient name \_\_\_\_\_  
 Patient study ID \_\_\_\_\_  
 Date of interview \_\_\_\_\_

Interviewer

Q0. The name of the site the patient was recruited from. (Choose one)

- 1 Hospital \_\_\_\_\_
- 2 Health center \_\_\_\_\_
- 3 Outside professional health system through  
 (name of community health worker)  
 \_\_\_\_\_

Q00. Interviewee

- 1 Patient him/herself
- 2 Patient proxy (go to Child questionnaire)

**READ:** Now we are going to talk about your illness period. I will give you a calendar that will help you answer the following questions.

Show calendar flashcard (form 1) to the patient and continue to use through Q15. Write "today" in the box for today's date.

Q1. When did you start feeling ill? \_\_\_\_\_ dd/mm/yyyy  
 Write "illness started" on that date in the calendar. 01/01/2097 Don't Know  
 01/01/2098 Refuse to Answer

Q2. Have you had fever during this illness episode that started in [date in Q1]?  
 1 Yes  
 0 No **Skip to Q6**  
 8 Refuse to Answer **Skip to Q6**

Q.3 When did your fever start? \_\_\_\_\_ dd/mm/yyyy  
 Write "fever started" on that date in the calendar, 01/01/2097 Don't Know  
 01/01/2098 Refuse to Answer

Q.4 Did your fever end?  
 1 Yes  
 0 No **Skip to Q6**  
 8 Refuse to Answer **Skip to Q6**

Q.5 When did your fever end? \_\_\_\_\_ dd/mm/yyyy  
 Write "fever ended" on that date in the calendar, 01/01/2097 Don't Know  
 01/01/2098 Refuse to Answer

Q6. What other symptoms did you have?  
 1 Myalgia  
 2 Nausea  
 3 Headache  
 4 Others

Q6a Other Symptoms \_\_\_\_\_  
\_\_\_\_\_  
\_\_\_\_\_

- Q7. Over your entire illness, on which day did you feel worst?  
*Write "worst day" on that date in the calendar,*
- |                |                  |
|----------------|------------------|
| ____/____/____ | dd/mm/yyyy       |
| 01/01/2097     | Don't Know       |
| 01/01/2098     | Refuse to Answer |
- Q8. At the time of this interview, are you still feeling ill?
- |   |     |                    |
|---|-----|--------------------|
| 1 | Yes | <b>Skip to Q11</b> |
| 0 | No  |                    |
- Q9. Have you recovered completely from this illness period?
- |   |                   |                    |
|---|-------------------|--------------------|
| 1 | Yes               |                    |
| 0 | No                | <b>Skip to Q11</b> |
| 8 | Refused to Answer | <b>Skip to Q11</b> |
- Q10. When did you recover completely from the illness episode?  
*Write "recovered completely" on that date in the calendar,*
- |                |                  |
|----------------|------------------|
| ____/____/____ | dd/mm/yyyy       |
| 01/01/2097     | Don't Know       |
| 01/01/2098     | Refuse to Answer |
- Q11. How soon after you started feeling ill did you first receive care by a medical care provider? (Choose one)
- |   |                         |
|---|-------------------------|
| 1 | Within 24 hours         |
| 2 | Between 24 and 48 hours |
| 3 | After 48 hours          |
| 7 | Don't Know              |
| 8 | Refused to Answer       |

Care received by patient from the day he/she started feeling ill until today

**NOTE to interviewer: if you have forms from hospital please fill Q12 and 13 from the hospital form**

- Q12. Is the hospital where the patient was admitted a public, social-private, or private?
- |   |                  |
|---|------------------|
| 1 | Public           |
| 2 | Social-private   |
| 3 | Private          |
| 7 | Don't Know       |
| 8 | Refuse to Answer |
- Q13. Indicate the type of hospital in which you spent the most number of nights?
- |   |                                           |
|---|-------------------------------------------|
| 1 | University, tertiary or referral hospital |
| 2 | Other hospital                            |
| 7 | Don't Know                                |
| 8 | Refuse to Answer                          |

Hospitalization

**READ: In the next set of questions I would like to know whether you have spent one or more nights in a hospital.**

- Q14. Were you hospitalized during this illness episode?
- |   |                   |                                       |
|---|-------------------|---------------------------------------|
| 1 | Yes               |                                       |
| 0 | No                | <b>Skip to instruction before Q26</b> |
| 8 | Refused to answer | <b>Skip to instruction before Q26</b> |
- Q14a. When were your admitted to the hospital  
Write "admission" on that date in the calendar,
- |            |                  |
|------------|------------------|
| __/__/__   | dd/mm/yyyy       |
| 01/01/2097 | Don't Know       |
| 01/01/2098 | Refuse to Answer |
- Q14b. During this hospitalization, for how many nights did you stay in the hospital? \_\_ \_\_ . \_\_ \_\_
- |    |                  |
|----|------------------|
| 98 | Refuse to Answer |
|----|------------------|
- Q14c. When were your discharged from the hospital  
Write "discharged" on that date in the calendar,
- |            |                  |
|------------|------------------|
| __/__/__   | dd/mm/yyyy       |
| 01/01/2097 | Don't Know       |
| 01/01/2098 | Refuse to Answer |

**READ: Now I would like to ask you some questions on the duration of your hospitalization, the out-of-pocket payments you made for treatment and other spending related to this hospitalization.**

- Q15. Can you please tell me which type of hospital ward-class did you stay at for the majority of your hospital stay?
- |   |         |
|---|---------|
| 1 | VIP     |
| 2 | Class 1 |
| 3 | Class 2 |
| 4 | Class 3 |

- Q16. During your hospitalization, did you stay any night in an intensive care unit?
- |   |                  |                                       |
|---|------------------|---------------------------------------|
| 1 | Yes              |                                       |
| 0 | No               | <b>Skip to instruction before Q18</b> |
| 8 | Refuse to Answer | <b>Skip to instruction before Q18</b> |
- Q17. For how many nights did you stay in the intensive care unit? (if patient stayed in the intensive care unit for one night or less then mark "1".
- \_\_\_\_\_ . \_\_\_\_\_  
98 Refuse to A

**READ: Now I will ask about the out-of-pocket payments you made in this facility.**

**Your out-of-pocket payments are the total amounts paid by you or your family for your treatment, whether or not you received reimbursement for all or part of this paid amount during this illness episode.**

- Q18. Please report your best estimate of the total out-of-pocket payment that you have paid up to today for services delivered in during your hospitalization? (Round all items to the nearest IDR). If there were no payments, please enter "0".
- Please include both payments already made and those that are expected to be made for the services received.

|   |                  |                                       |
|---|------------------|---------------------------------------|
| 7 | Don't Know       | <b>Skip to instruction before Q23</b> |
| 8 | Refuse to Answer | <b>Skip to instruction before Q23</b> |

- Q19. Can you break down these payments by type of service received during your stay in the hospital?
- |   |                  |                                       |
|---|------------------|---------------------------------------|
| 1 | Yes              |                                       |
| 0 | No               | <b>Skip to instruction before Q23</b> |
| 7 | Don't Know       | <b>Skip to instruction before Q23</b> |
| 8 | Refuse to Answer | <b>Skip to instruction before Q23</b> |

- Q20. How much did your household pay out-of-pocket for consultation, admission and discharge fees?  
If no spending put "0".
- |   |                  |
|---|------------------|
| 7 | Don't Know       |
| 8 | Refuse to Answer |
| 9 | Not Applicable   |

- Q21. How much did your household pay out-of-pocket for diagnostic tests such as blood tests, dengue test, x-rays or sonogram?  
If no spending put "0".
- |   |                  |
|---|------------------|
| 7 | Don't Know       |
| 8 | Refuse to Answer |
| 9 | Not Applicable   |

- Q22. How much did your household pay out-of-pocket on all treatment such as medications, intravenous fluid (IVF), medical equipment (I/V sets) or blood bank.  
If no spending put "0"
- |   |                  |
|---|------------------|
| 7 | Don't Know       |
| 8 | Refuse to Answer |
| 9 | Not Applicable   |

**READ: Now I would like to ask you questions about other spending related to your illness during this illness episode from the day you started feeling ill [Response to Q1] until today, such as spending on transportation, meals or lodging. Include also any expenses by any other household member (person you live with), other family members or friend who accompanied you to the hospital for care.**

Q23a. Can you please tell me the type of transportation you used to go to the hospital?

---

**Note to interviewer: if patient used household own car or motorcycle then, ask about the distance from the patient's house to the hospital. If the patient doesn't know the answer then use google map to determine the distance.**

Q23b. Please report your best estimate of your household out of pocket spending on transportation to the hospital, including ambulance.

If no spending put "0".

If family or owned vehicle, estimate mileage traveled (two ways travel) and use **IDR 16,000 per Km** as a proxy for the cost of driving. If family or patient owned Auto-rickshaw/own scooter use **IDR 14,000 per Km**. If no spending record "0.00".

-----  
7 Don't Know  
8 Refuse to Answer  
9 Not applicable

Q23c. Can you please tell me the type of transportation you used to get back from the hospital?

---

**Note to interviewer: if transportation used was a car, ask about the distance from hospital to patient's house.**



Q23d. Please report your best estimate of your household out of pocket spending on transportation from the hospital, including ambulance.  
 If no spending put "0".  
*If family or owned vehicle, estimate mileage traveled (two ways travel) and use IDR 16,000 per Km as a proxy for the cost of driving. If family or patient owned Auto-rickshaw/own scooter use IDR 14,000 per Km. If no spending record "0.00".*

- |       |   |                  |
|-------|---|------------------|
| _____ | 7 | Don't Know       |
|       | 8 | Refuse to Answer |
|       | 9 | Not Applicable   |

Q24. Please report best estimate of your household out-of-pocket spending on food or meals.  
 If no spending put "0"

- |       |   |                  |
|-------|---|------------------|
| _____ | 7 | Don't Know       |
|       | 8 | Refuse to Answer |
|       | 9 | Not Applicable   |

Q25. Please report best estimate of your household out-of-pocket spending on lodging in a non-health facility such as a hotel.  
 If no spending put "0"

- |       |   |                  |
|-------|---|------------------|
| _____ | 7 | Don't Know       |
|       | 8 | Refuse to Answer |
|       | 9 | Not Applicable   |

**Ambulatory care**

**READ:** These next questions are about any ambulatory health care sought or received since you started feeling ill on [Response to Q1] until today. Please, **include** care from all types of health facilities such as pharmacy, traditional healer, private clinic, Puskesmas primary health center, midwife, hospital outpatient department and/or emergency room, and private lab.

Q26. Did you visit any ambulatory health facility during your latest dengue episode? (Show flash card Form 1).

- 1 Yes
- 0 No **Go to Q40**
- 8 Refuse to Answer **Go to Q40**

**READ:** Think about each time you had contacted with one of those health facilities during the dengue episode that started in [date in Q1]. Then specify the type of care you received at each of the health facilities you visited (consultations, diagnostic tests and/or treatment) and try to remember the amounts your household, other family members or friend paid out of pocket in total or for each type of service received.

Q27. How many visits have you had to any of the following health facilities during this interview period? **Show flashcard forms 1 (calendar) and 2 (List of healthcare providers)**

| Visit                                    | Number of visits |
|------------------------------------------|------------------|
| Pharmacy (01)                            |                  |
| Traditional healer (02)                  |                  |
| Private clinic (03)                      |                  |
| Puskesmas Primary health center (04)     |                  |
| Midwife (05)                             |                  |
| Outpatient department in a hospital (06) |                  |
| Emergency room (07)                      |                  |
| Private lab (08)                         |                  |
| Satellite health center (09)             |                  |
| Other (10)                               |                  |
| Specify others _____                     |                  |

Q28. Choose from the following the first (*second, third,..*) type of health facility you contracted during this interview period. Can you give the date of each visit? (**Show flashcard form 2 and form 1 (the calendar)**) (Choose one for each visit)

| Visit                                    | First | Second | Third | Fourth | Fifth | Sixth |
|------------------------------------------|-------|--------|-------|--------|-------|-------|
| Date                                     |       |        |       |        |       |       |
| Type of facility                         |       |        |       |        |       |       |
| Pharmacy (01)                            |       |        |       |        |       |       |
| Traditional healer (02)                  |       |        |       |        |       |       |
| Private clinic (03)                      |       |        |       |        |       |       |
| Puskesmas Primary health center (04)     |       |        |       |        |       |       |
| Midwife (05)                             |       |        |       |        |       |       |
| Outpatient department in a hospital (06) |       |        |       |        |       |       |
| Emergency room (07)                      |       |        |       |        |       |       |
| Private lab (08)                         |       |        |       |        |       |       |
| Satellite health center (09)             |       |        |       |        |       |       |
| Other (10), Specify _____                |       |        |       |        |       |       |
| Don't know (97)                          |       |        |       |        |       |       |

|                       |  |  |  |  |  |
|-----------------------|--|--|--|--|--|
| Refuse to answer (98) |  |  |  |  |  |
|-----------------------|--|--|--|--|--|

**Read:** What is the name of the facility you went to? (Fill in the space next to type of facility the patient chose)

**Note for interviewer:** A “Public” Facility is a health facility operated by any level of government, and a “social-private” facility is organization run by private non-profit organization, Private is an individual doctor or group of private doctors.

Q29. What type of facility did you visit, during your X visit? Was it public or non-public facility? (Choose one per visit)

| Visit  | Public (1) | Social-private (2) | Private (3) | Don't know (7) | Refuse to answer (8) |
|--------|------------|--------------------|-------------|----------------|----------------------|
| First  |            |                    |             |                |                      |
| Second |            |                    |             |                |                      |
| Third  |            |                    |             |                |                      |
| Fourth |            |                    |             |                |                      |
| Fifth  |            |                    |             |                |                      |
| Sixth  |            |                    |             |                |                      |

Q30. What kind of service did you receive in this facility during your X visit? (Check all that apply)

| Visit  | Consultations | Diagnostic test such as x-ray, blood test | Treatment such as medications, intravenous fluid | Referral | Don't know (7) | Refuse to answer (8) |
|--------|---------------|-------------------------------------------|--------------------------------------------------|----------|----------------|----------------------|
| First  |               |                                           |                                                  |          |                |                      |
| Second |               |                                           |                                                  |          |                |                      |
| Third  |               |                                           |                                                  |          |                |                      |
| Fourth |               |                                           |                                                  |          |                |                      |
| Fifth  |               |                                           |                                                  |          |                |                      |
| Sixth  |               |                                           |                                                  |          |                |                      |

**READ:** Now I would like to ask you about the out-of-pocket payments your household, other family members or friend, made in this facility.

**Note for interviewer:** Whenever possible, cross check the amount with bills available from the health facility.

Q31. Please report your best estimate of the total out-of-pocket payment for services received in this facility? Please include both payments already made and those that are expected to be made for the services received.

If there were no payments, please enter “0.00”.

| Visit  | Amount, IDR | <i>If zero skip to instruction before Q36a</i> | Don't know (7) | <i>Skip to instruction before Q36a</i> | Refuse of answer (8) | <i>Skip to instruction before Q36a</i> |
|--------|-------------|------------------------------------------------|----------------|----------------------------------------|----------------------|----------------------------------------|
| First  |             |                                                |                |                                        |                      |                                        |
| Second |             |                                                |                |                                        |                      |                                        |
| Third  |             |                                                |                |                                        |                      |                                        |
| Fourth |             |                                                |                |                                        |                      |                                        |
| Fifth  |             |                                                |                |                                        |                      |                                        |
| Sixth  |             |                                                |                |                                        |                      |                                        |

Q32. Can you break down the total payments by type of service received?

| Visit  | Yes (1) | No (0) | <i>Skip to instruction before Q36a</i> | Refuse to answer (8) | <i>Skip to instruction before Q36a</i> | Not applicable (9) | <i>Skip to instruction before Q36a</i> |
|--------|---------|--------|----------------------------------------|----------------------|----------------------------------------|--------------------|----------------------------------------|
| First  |         |        |                                        |                      |                                        |                    |                                        |
| Second |         |        |                                        |                      |                                        |                    |                                        |
| Third  |         |        |                                        |                      |                                        |                    |                                        |

|        |  |  |  |  |  |  |
|--------|--|--|--|--|--|--|
| Fourth |  |  |  |  |  |  |
| Fifth  |  |  |  |  |  |  |
| Sixth  |  |  |  |  |  |  |

Q33. Out-of-pocket payment on: Consultation. (If no payment record "0.00")

| Visit  | Amount, IDR | Don't know (7) | Refuse to answer (8) | Not applicable (9) |
|--------|-------------|----------------|----------------------|--------------------|
| First  |             |                |                      |                    |
| Second |             |                |                      |                    |
| Third  |             |                |                      |                    |
| Fourth |             |                |                      |                    |
| Fifth  |             |                |                      |                    |
| Sixth  |             |                |                      |                    |

Q34. Out-of-pocket payment on: diagnostic tests or blood bank such as blood test, dengue test, x-rays, sonogram...  
If no payment record "0.00".

| Visit  | Amount, IDR | Don't know (7) | Refuse to answer (8) | Not applicable (9) |
|--------|-------------|----------------|----------------------|--------------------|
| First  |             |                |                      |                    |
| Second |             |                |                      |                    |
| Third  |             |                |                      |                    |
| Fourth |             |                |                      |                    |
| Fifth  |             |                |                      |                    |
| Sixth  |             |                |                      |                    |

Q35. Out-of-pocket payment on: treatment such as medications, medical equipment (intravenous sets).  
If no payment record "0.00".

| Visit  | Amount, IDR | Don't know (7) | Refuse to answer (8) | Not applicable (9) |
|--------|-------------|----------------|----------------------|--------------------|
| First  |             |                |                      |                    |
| Second |             |                |                      |                    |
| Third  |             |                |                      |                    |
| Fourth |             |                |                      |                    |
| Fifth  |             |                |                      |                    |
| Sixth  |             |                |                      |                    |

**READ:** Now I would like to ask you questions about other spending your household, other family members or friend, made specific for this facility during this illness episode such as spending on transportation, meals and lodging. Include also any expenses by any other household member who accompanied you to this first (second, third,..) facility for care.

Q36a. Can you please tell me the type of transportation you used to go to the [TYPE of health facility]?

**Note to interviewer: if transportation used was household own car or motorcycle, ask about the distance from the patient's house to the [health facility].**

| Visit  | Transportation type | Distance, KM |
|--------|---------------------|--------------|
| First  |                     |              |
| Second |                     |              |
| Third  |                     |              |
| Fourth |                     |              |
| Fifth  |                     |              |
| Sixth  |                     |              |

Q36b. Please report the best estimate of out-of-pocket spending on transportation to the [TYPE of health facility]

If family or owned vehicle, estimate mileage traveled (two ways travel) and use **IDR 16,000 per Km** as a proxy for the cost of driving. If family or patient owned Auto-rickshaw/own scooter use **IDR 14,000 per Km**. If no spending record "0.00".

| Visit  | Amount, IDR | Don't know (7) | Refuse to answer (8) | Not applicable (9) |
|--------|-------------|----------------|----------------------|--------------------|
| First  |             |                |                      |                    |
| Second |             |                |                      |                    |
| Third  |             |                |                      |                    |
| Fourth |             |                |                      |                    |
| Fifth  |             |                |                      |                    |
| Sixth  |             |                |                      |                    |

Q36c. Can you please tell me the type of transportation you used to get back home from the [TYPE of health facility]?

**Note to interviewer: if transportation used was a car, ask about the distance from [health facility] to patient's house.**

| Visit  | Transportation type | Distance, KM |
|--------|---------------------|--------------|
| First  |                     |              |
| Second |                     |              |
| Third  |                     |              |
| Fourth |                     |              |
| Fifth  |                     |              |
| Sixth  |                     |              |

Q36d. Please report the best estimate of out-of-pocket spending on transportation from the [Type health facility] to your home  
If family or owned vehicle, estimate mileage traveled (two ways travel) and use **IDR 16,000 per Km** as a proxy for the cost of driving. If family or patient owned Auto-rickshaw/own scooter use **IDR 14,000 per Km**. If no spending record "0.00".

| Visit  | Amount, IDR | Don't know (7) | Refuse to answer (8) | Not applicable (9) |
|--------|-------------|----------------|----------------------|--------------------|
| First  |             |                |                      |                    |
| Second |             |                |                      |                    |
| Third  |             |                |                      |                    |
| Fourth |             |                |                      |                    |
| Fifth  |             |                |                      |                    |
| Sixth  |             |                |                      |                    |

Q37. Please report the best estimate of out-of-pocket spending on food or meals.

*If not spending report "0.00"*

| Visit  | Amount, IDR | Don't know (7) | Refuse to answer (8) | Not applicable (9) |
|--------|-------------|----------------|----------------------|--------------------|
| First  |             |                |                      |                    |
| Second |             |                |                      |                    |
| Third  |             |                |                      |                    |
| Fourth |             |                |                      |                    |
| Fifth  |             |                |                      |                    |
| Sixth  |             |                |                      |                    |

Q38. Please report the best estimate of out-of-pocket spending on lodging in a non-health facility such as a hotel.

*If not spending report "0.00"*

| Visit  | Amount, IDR | Don't know (7) | Refuse to answer (8) | Not applicable (9) |
|--------|-------------|----------------|----------------------|--------------------|
| First  |             |                |                      |                    |
| Second |             |                |                      |                    |
| Third  |             |                |                      |                    |
| Fourth |             |                |                      |                    |
| Fifth  |             |                |                      |                    |

Q39. Any other health facilities visited during this illness period from the day you stated feeling ill [Response to Q1] until today?

- 1 Yes **Repeat the process starting with Q28 through Q39**
- 0 No

**Illness impact on household members, other family members who reside outside your household or friends during this illness episode**

**READ:** I would like to learn about how your recent dengue illness that occurred in [Date] have affected you and each of the members of your household, other family members who reside outside your household or friends.

**READ:** Let us talk about you first.

**The patient**

Q40. Please record the sex of the patient without having to ask him/her.

- 1 Male
- 2 Female

Q41. What is your current age? \_\_\_\_\_

- 999 Don't Know
- 998 Refuse to answer

Q41a. What is your date of birth (day/month and year)?

|             |                  |
|-------------|------------------|
| ___/___/___ | dd/mm/yyyy       |
| 01/01/2097  | Don't Know       |
| 01/01/2098  | Refuse to Answer |

Q42. What is the highest level of education you have completed? (Choose one)  
*Show Flashcard-Form 3*

- 01 Illiterate
- 02 Just literate but no schooling
- 03 Attended school for at least one year
- 04 Pre-school
- 05 Primary school
- 06 Middle school
- 07 High school
- 08 Diploma
- 09 Graduate
- 10 Post graduate (Masters, PhD)
- 11 Professional degree
- 97 Don't know
- 98 Refuse to answer
- 99 Not applicable

Q43. Are you currently studying?

- 1 Yes
- 0 No **Skip to Q46**
- 8 Refused to answer **Skip to Q46**

- Q44. Have you lost any days of school due to your illness?
- |   |                   |                    |
|---|-------------------|--------------------|
| 1 | Yes               |                    |
| 0 | No                | <b>Skip to Q46</b> |
| 8 | Refused to answer |                    |
- Q45. How many days of school did you miss due to your illness?  
Put "0" if none
- |       |                  |  |
|-------|------------------|--|
| _____ |                  |  |
| 97    | Don't know       |  |
| 98    | Refuse to answer |  |
| 99    | Not applicable   |  |
- Q46. Are you working for pay?
- |   |                   |                     |
|---|-------------------|---------------------|
| 1 | Yes               |                     |
| 0 | No                | <b>Skip to Q51a</b> |
| 8 | Refused to answer |                     |
- Q47. Have you lost any days of work due to your illness?
- |   |                   |                     |
|---|-------------------|---------------------|
| 1 | Yes               |                     |
| 0 | No                | <b>Skip to Q51a</b> |
| 7 | Don't know        | <b>Skip to Q51a</b> |
| 8 | Refused to answer | <b>Skip to Q51a</b> |
- Q48. How many days of work did you lose due to your illness?  
Put "0" if none
- |       |                  |  |
|-------|------------------|--|
| _____ |                  |  |
| 97    | Don't know       |  |
| 98    | Refuse to answer |  |
| 99    | Not applicable   |  |
- Q49. Did you receive any paid sick leave for work days off, in which your employer or some agency paid your salary while you were ill?
- |   |                   |                     |
|---|-------------------|---------------------|
| 1 | Yes               |                     |
| 0 | No                | <b>Skip to Q51a</b> |
| 7 | Don't know        | <b>Skip to Q51a</b> |
| 8 | Refused to answer | <b>Skip to Q51a</b> |
| 9 | Not applicable    | <b>Skip to Q51a</b> |
- Q50. How many paid sick days did you receive for this illness?  
Put "0" if none
- |       |                  |  |
|-------|------------------|--|
| _____ |                  |  |
| 97    | Don't know       |  |
| 98    | Refuse to answer |  |
| 99    | Not applicable   |  |
- Q51a. Have you lost any income due to your illness?
- |   |                   |                    |
|---|-------------------|--------------------|
| 1 | Yes               |                    |
| 0 | No                | <b>Skip to Q52</b> |
| 7 | Don't know        | <b>Skip to Q52</b> |
| 8 | Refused to answer | <b>Skip to Q52</b> |
- Q51b. What was the amount of income you lost? (Please give your best estimate)
- \_\_\_\_\_

|   |                   |
|---|-------------------|
| 7 | Don't know        |
| 8 | Refused to answer |
| 9 | Not applicable    |

Q52. Did you receive any monetary or non- monetary assistance from family members or the community for this illness episode?

|   |                   |                    |
|---|-------------------|--------------------|
| 1 | Yes               |                    |
| 0 | No                | <b>Skip to Q55</b> |
| 8 | Refused to answer | <b>Skip to Q55</b> |

Q53. What is your best estimate of the value of the non- monetary assistance?

*True 0 if no non-financial assistance.*

Put "0" if none

|       |                  |
|-------|------------------|
| _____ |                  |
| 97    | Don't know       |
| 98    | Refuse to answer |
| 99    | Not applicable   |

**Note to interviewer: If don't know, write the type of non-monetary assistance received by patient and patient's family**

---

Q54. What is the total amount in IDR of the monetary assistance?

Put "0" if none

|       |                  |
|-------|------------------|
| _____ |                  |
| 97    | Don't know       |
| 98    | Refuse to answer |
| 99    | Not applicable   |



**Number of household members**

Q55. How many members live in your household? (Other than yourself?)

00 Zero **End interview**  
 98 Refuse to answer

Q56. How many of these household members have been affected by your illness directly during this illness episode?

**READ:** Household members are people who live with you and share meals. A household member is affected if he or she spent more time or money than usual caring for you or lost work, income, or school due to your illness.

00 Zero **End interview**  
 98 Refuse to answer **End Interview**

**READ:** Now I would like to ask you some questions about this/these [Response to Q56] member/s of your household who has/have been affected by your illness.

**Care-givers**

Q57. What is the relationship of this (first, second,...) affected household member to you? (Choose one)

*Show flashcard form 4*

| Relationship             | Household member |               |              |               |              |              |                |               |
|--------------------------|------------------|---------------|--------------|---------------|--------------|--------------|----------------|---------------|
|                          | First member     | Second member | Third member | Fourth member | Fifth member | Sixth member | Seventh member | Eighth member |
| Mother (01)              |                  |               |              |               |              |              |                |               |
| Father (02)              |                  |               |              |               |              |              |                |               |
| Husband (03)             |                  |               |              |               |              |              |                |               |
| Wife (04)                |                  |               |              |               |              |              |                |               |
| Housemate (05)           |                  |               |              |               |              |              |                |               |
| Sister (06)              |                  |               |              |               |              |              |                |               |
| Brother (07)             |                  |               |              |               |              |              |                |               |
| Son (08)                 |                  |               |              |               |              |              |                |               |
| Daughter (09)            |                  |               |              |               |              |              |                |               |
| Grandmother (10)         |                  |               |              |               |              |              |                |               |
| Grandfather (11)         |                  |               |              |               |              |              |                |               |
| Uncle (12)               |                  |               |              |               |              |              |                |               |
| Aunt (13)                |                  |               |              |               |              |              |                |               |
| House help (14)          |                  |               |              |               |              |              |                |               |
| Baby sitter (15)         |                  |               |              |               |              |              |                |               |
| Other (16) Specify _____ |                  |               |              |               |              |              |                |               |
| Refuse to answer (98)    |                  |               |              |               |              |              |                |               |

Q58. What is [Household member]'s age?

| Household member | Age in years | Don't know (997) | Refuse to answer (998) |
|------------------|--------------|------------------|------------------------|
| First member     |              |                  |                        |
| Second member    |              |                  |                        |
| Third member     |              |                  |                        |

|                |  |  |  |
|----------------|--|--|--|
| Fourth member  |  |  |  |
| Fifth member   |  |  |  |
| Sixth member   |  |  |  |
| Seventh member |  |  |  |
| Eighth member  |  |  |  |

Q58. What was the highest level of education that [household member] completed? (Choose one)

*Show flashcard-form 3*

| Relationship                               | Household member |               |              |               |              |              |                |               |
|--------------------------------------------|------------------|---------------|--------------|---------------|--------------|--------------|----------------|---------------|
|                                            | First member     | Second member | Third member | Fourth member | Fifth member | Sixth member | Seventh member | Eighth member |
| Illiterate (01)                            |                  |               |              |               |              |              |                |               |
| Just literal but no schooling (02)         |                  |               |              |               |              |              |                |               |
| Attended school for at least one year (03) |                  |               |              |               |              |              |                |               |
| Pre-school (04)                            |                  |               |              |               |              |              |                |               |
| Primary school (05)                        |                  |               |              |               |              |              |                |               |
| Middle school (06)                         |                  |               |              |               |              |              |                |               |
| High school (07)                           |                  |               |              |               |              |              |                |               |
| Diploma (08)                               |                  |               |              |               |              |              |                |               |
| Graduate (09)                              |                  |               |              |               |              |              |                |               |
| Post graduate (Masters, PhD) (10)          |                  |               |              |               |              |              |                |               |
| Professional degree (11)                   |                  |               |              |               |              |              |                |               |
| Don't know (97)                            |                  |               |              |               |              |              |                |               |
| Refuse to answer (98)                      |                  |               |              |               |              |              |                |               |
| Not applicable (99)                        |                  |               |              |               |              |              |                |               |

Q59. Is [Household member] currently studying?

| Household member | Yes (Code:1) | No (Code:2) | <b>Skip to Q62</b> | Don't know (Code:7) | <b>Skip to Q62</b> | Refuse to answer (Code:8) | <b>Skip to Q62</b> |
|------------------|--------------|-------------|--------------------|---------------------|--------------------|---------------------------|--------------------|
| First member     |              |             |                    |                     |                    |                           |                    |
| Second member    |              |             |                    |                     |                    |                           |                    |
| Third member     |              |             |                    |                     |                    |                           |                    |
| Fourth member    |              |             |                    |                     |                    |                           |                    |
| Fifth member     |              |             |                    |                     |                    |                           |                    |
| Sixth member     |              |             |                    |                     |                    |                           |                    |
| Seventh member   |              |             |                    |                     |                    |                           |                    |
| Eighth member    |              |             |                    |                     |                    |                           |                    |

Q60. Has [Household member] lost any days of school due to your illness?

| Household member | Yes (Code:1) | No (Code:2) | <b>Skip to Q62</b> | Don't know (Code:7) | <b>Skip to Q62</b> | Refuse to answer (Code:8) | <b>Skip to Q62</b> |
|------------------|--------------|-------------|--------------------|---------------------|--------------------|---------------------------|--------------------|
| First member     |              |             |                    |                     |                    |                           |                    |
| Second member    |              |             |                    |                     |                    |                           |                    |
| Third member     |              |             |                    |                     |                    |                           |                    |
| Fourth member    |              |             |                    |                     |                    |                           |                    |
| Fifth member     |              |             |                    |                     |                    |                           |                    |
| Sixth member     |              |             |                    |                     |                    |                           |                    |

|                |  |  |  |  |  |  |
|----------------|--|--|--|--|--|--|
| Seventh member |  |  |  |  |  |  |
| Eighth member  |  |  |  |  |  |  |

Q61. How many days of school did [household member] missed due to your illness?

*Record "0" if none*

| Household member | Days of schooling lost | Don't know (97) | Refuse to answer (98) |
|------------------|------------------------|-----------------|-----------------------|
| First member     |                        |                 |                       |
| Second member    |                        |                 |                       |
| Third member     |                        |                 |                       |
| Fourth member    |                        |                 |                       |
| Fifth member     |                        |                 |                       |
| Sixth member     |                        |                 |                       |
| Seventh member   |                        |                 |                       |
| Eighth member    |                        |                 |                       |

Q62. Is [Household member] working for pay?

| Household member | Yes (Code:1) | No (Code: 0) | <i>If no skip to Q67a</i> | Don't know (Code:7) | <i>Skip to Q67a</i> | Refuse to answer (Code:8) | <i>Skip to Q67a</i> |
|------------------|--------------|--------------|---------------------------|---------------------|---------------------|---------------------------|---------------------|
| First member     |              |              |                           |                     |                     |                           |                     |
| Second member    |              |              |                           |                     |                     |                           |                     |
| Third member     |              |              |                           |                     |                     |                           |                     |
| Fourth member    |              |              |                           |                     |                     |                           |                     |
| Fifth member     |              |              |                           |                     |                     |                           |                     |
| Sixth member     |              |              |                           |                     |                     |                           |                     |
| Seventh member   |              |              |                           |                     |                     |                           |                     |
| Eighth member    |              |              |                           |                     |                     |                           |                     |

Q63. Has [Household member] lost any days of work due to your illness?

| Household member | Yes (Code:1) | No (Code: 0) | <i>Skip to Q67a</i> | Don't know (Code:7) | <i>Skip to Q67a</i> | Refuse to answer (Code:8) | <i>Skip to Q67a</i> |
|------------------|--------------|--------------|---------------------|---------------------|---------------------|---------------------------|---------------------|
| First member     |              |              |                     |                     |                     |                           |                     |
| Second member    |              |              |                     |                     |                     |                           |                     |
| Third member     |              |              |                     |                     |                     |                           |                     |
| Fourth member    |              |              |                     |                     |                     |                           |                     |
| Fifth member     |              |              |                     |                     |                     |                           |                     |
| Sixth member     |              |              |                     |                     |                     |                           |                     |
| Seventh member   |              |              |                     |                     |                     |                           |                     |
| Eighth member    |              |              |                     |                     |                     |                           |                     |

Q64. How many days of work did [Household member] lose due to your illness?

*Record "0" if none*

| Household member | Number of days | Don't know (Code:97) |  | Refuse to answer (Code:98) |  | Not applicable (Code:99) |
|------------------|----------------|----------------------|--|----------------------------|--|--------------------------|
| First member     |                |                      |  |                            |  |                          |
| Second member    |                |                      |  |                            |  |                          |
| Third member     |                |                      |  |                            |  |                          |
| Fourth member    |                |                      |  |                            |  |                          |
| Fifth member     |                |                      |  |                            |  |                          |
| Sixth member     |                |                      |  |                            |  |                          |

|                |  |  |  |  |  |  |
|----------------|--|--|--|--|--|--|
| Seventh member |  |  |  |  |  |  |
| Eighth member  |  |  |  |  |  |  |

Q65. Did [household member] receive any paid sick leave for work days off, in which the employer or some agency paid his/her salary for caring for you while you were ill?

| Household member | Yes (Code: 1) | No (Code: 0) | <b>Skip to Q67a</b> | Don't know (Code:7) | <b>Skip to Q67a</b> | Refused to answer (Code:8) | <b>Skip to Q67a</b> | Not Applicable (Code:9) | <b>Skip to Q67a</b> |
|------------------|---------------|--------------|---------------------|---------------------|---------------------|----------------------------|---------------------|-------------------------|---------------------|
| First member     |               |              |                     |                     |                     |                            |                     |                         |                     |
| Second member    |               |              |                     |                     |                     |                            |                     |                         |                     |
| Third member     |               |              |                     |                     |                     |                            |                     |                         |                     |
| Fourth member    |               |              |                     |                     |                     |                            |                     |                         |                     |
| Fifth member     |               |              |                     |                     |                     |                            |                     |                         |                     |
| Sixth member     |               |              |                     |                     |                     |                            |                     |                         |                     |
| Seventh member   |               |              |                     |                     |                     |                            |                     |                         |                     |
| Eighth member    |               |              |                     |                     |                     |                            |                     |                         |                     |

Q66. How many paid sick days did [household member] receive?

| Household member | Number of paid sick days | Don't know (97) | Refuse to answer (98) |
|------------------|--------------------------|-----------------|-----------------------|
| First member     |                          |                 |                       |
| Second member    |                          |                 |                       |
| Third member     |                          |                 |                       |
| Fourth member    |                          |                 |                       |
| Fifth member     |                          |                 |                       |
| Sixth member     |                          |                 |                       |
| Seventh member   |                          |                 |                       |
| Eighth member    |                          |                 |                       |

Q67a. Has [Household member] lost any income due to your illness?

| Household member | Yes (Code:1) | No (Code: 0) | <b>Skip to Q68</b> | Don't know (Code:7) | <b>Skip to Q68</b> | Refuse to answer (Code:8) | <b>Skip to Q68</b> |
|------------------|--------------|--------------|--------------------|---------------------|--------------------|---------------------------|--------------------|
| First member     |              |              |                    |                     |                    |                           |                    |
| Second member    |              |              |                    |                     |                    |                           |                    |
| Third member     |              |              |                    |                     |                    |                           |                    |
| Fourth member    |              |              |                    |                     |                    |                           |                    |
| Fifth member     |              |              |                    |                     |                    |                           |                    |
| Sixth member     |              |              |                    |                     |                    |                           |                    |
| Seventh member   |              |              |                    |                     |                    |                           |                    |
| Eighth member    |              |              |                    |                     |                    |                           |                    |

Q67b. What was the amount of income [household member] lost due to your illness? (Please give your best estimate).  
If no payment record "0.00".

| Household member | Amount, IDR | Don't know (7) | Refuse to answer (8) | Not applicable (9) |
|------------------|-------------|----------------|----------------------|--------------------|
| First member     |             |                |                      |                    |
| Second member    |             |                |                      |                    |
| Third member     |             |                |                      |                    |
| Fourth member    |             |                |                      |                    |
| Fifth member     |             |                |                      |                    |
| Sixth member     |             |                |                      |                    |

|                |  |  |  |  |
|----------------|--|--|--|--|
| Seventh member |  |  |  |  |
| Eighth member  |  |  |  |  |

Q68. Of the number of sick days during this illness episode that started on [date of illness till patient date of recovery or date of interview], what was the total number of days of additional care that [household member] provided to you?

*If none, enter 0*

| Household member | Number of days | <i>If "Zero" skip to Q70</i> | Don't know (Code:97) | <i>Skip to Q70</i> | Refused to answer (Code:98) | <i>Skip to Q70</i> | Not Applicable (Code:99) | <i>Skip to Q70</i> |
|------------------|----------------|------------------------------|----------------------|--------------------|-----------------------------|--------------------|--------------------------|--------------------|
| First member     |                |                              |                      |                    |                             |                    |                          |                    |
| Second member    |                |                              |                      |                    |                             |                    |                          |                    |
| Third member     |                |                              |                      |                    |                             |                    |                          |                    |
| Fourth member    |                |                              |                      |                    |                             |                    |                          |                    |
| Fifth member     |                |                              |                      |                    |                             |                    |                          |                    |
| Sixth member     |                |                              |                      |                    |                             |                    |                          |                    |
| Seventh member   |                |                              |                      |                    |                             |                    |                          |                    |
| Eighth member    |                |                              |                      |                    |                             |                    |                          |                    |

**READ:** In the questions below, think about the daily number of additional hours of care that you have received from [household member x] during your illness. Additional hours refer to any number of hours above those that [household member x] usually spends with you. In estimating the time, please include time spent at home, at the health facility and during transportation to and from the health facility

Q69. During these [Response to Q68] days, on average what was the average number of additional daily hours [household member x] spent caring for you?

*If none, enter 0*

| Household member | Average additional hours of daily care | Don't know (Code:97) | Refused to answer (Code:98) | Not Applicable (Code:99) |
|------------------|----------------------------------------|----------------------|-----------------------------|--------------------------|
| First member     |                                        |                      |                             |                          |
| Second member    |                                        |                      |                             |                          |
| Third member     |                                        |                      |                             |                          |
| Fourth member    |                                        |                      |                             |                          |
| Fifth member     |                                        |                      |                             |                          |
| Sixth member     |                                        |                      |                             |                          |
| Seventh member   |                                        |                      |                             |                          |
| Eighth member    |                                        |                      |                             |                          |

Q70. Did [household member x] have additional spending because of your illness such as transportation, meals or lodging expenditures other than the expenses previously mentioned for visiting health providers?

| Household member | Yes (Code:1) | No (Code: 0) | <i>Skip to next household member</i> | Don't know (Code:7) | <i>Skip to next household member</i> | Refused to answer (Code:8) | <i>Skip to next household member</i> | Not Applicable (Code:9) | <i>Skip to next household member</i> |
|------------------|--------------|--------------|--------------------------------------|---------------------|--------------------------------------|----------------------------|--------------------------------------|-------------------------|--------------------------------------|
| First member     |              |              |                                      |                     |                                      |                            |                                      |                         |                                      |
| Second member    |              |              |                                      |                     |                                      |                            |                                      |                         |                                      |
| Third member     |              |              |                                      |                     |                                      |                            |                                      |                         |                                      |
| Fourth member    |              |              |                                      |                     |                                      |                            |                                      |                         |                                      |
| Fifth member     |              |              |                                      |                     |                                      |                            |                                      |                         |                                      |
| Sixth member     |              |              |                                      |                     |                                      |                            |                                      |                         |                                      |

|                |  |  |  |  |  |  |  |  |
|----------------|--|--|--|--|--|--|--|--|
| Seventh member |  |  |  |  |  |  |  |  |
| Eighth member  |  |  |  |  |  |  |  |  |

Q71. For this question please report the best estimate of the total amount of additional spending over these [Number of days reported in Q68] days not already included in one of the previous questions  
*If no payment record "0.00".*

| Household member | Amount, IDR | Don't know (7) | Refuse to answer (8) | Not applicable (9) |
|------------------|-------------|----------------|----------------------|--------------------|
| First member     |             |                |                      |                    |
| Second member    |             |                |                      |                    |
| Third member     |             |                |                      |                    |
| Fourth member    |             |                |                      |                    |
| Fifth member     |             |                |                      |                    |
| Sixth member     |             |                |                      |                    |
| Seventh member   |             |                |                      |                    |
| Eighth member    |             |                |                      |                    |

*Check Q56, if the answer is more than 1 then do repeat questions 57 through 71 for all the household members listed. If Q56 is equal to 1, then read the sentence below and end interview.*

**READ:** Thank you so much for your participation! If you have any questions regarding this interview or the results of this study please contact xxx at [Name of institute] from xx at xxx

## **Supplementary Information**

### **Cost of dengue illness in Indonesia across hospital, ambulatory and non-medical settings**

S2: Questionnaire S2. Adult questionnaire in Bahasa Indonesia

Kuesioner untuk Pasien Dengue Dewasa Terkonfirmasi (Usia 18+)

Nama Pasien \_\_\_\_\_  
Nomor Sampel \_\_\_\_\_  
Tanggal Wawancara \_\_\_\_\_

Wawancara

Q0. Nama fasilitas kesehatan tempat pasien dirawat (pilih satu)

- 1 Rumah Sakit \_\_\_\_\_
- 2 Puskesmas \_\_\_\_\_
- 3 Dari luar fasilitas kesehatan, melalui kader a.n. \_\_\_\_\_

Q00. *Yang diwawancara*

- 1 Pasien sendiri
- 2 Wali pasien (ganti ke kuesioner wali)

**Bacakan:** Sekarang kita akan berbicara mengenai periode penyakit Anda. Dan saya akan menunjukkan kalender yang akan membantu Anda menjawab pertanyaan berikut.

*Tunjukkan kalender (form 1) ke pasien dan lanjutkan hingga Q15. Tuliskan "hari ini" pada kotak untuk tanggal hari ini.*

Q1. Kapan Anda mulai merasa sakit?

*Tuliskan "mulai sakit" pada tanggal di kalender*

\_\_/\_\_/\_\_\_\_

dd/mm/yyyy

01/01/2097

Tidak tahu

01/01/2098

Menolak menjawab

Q2. Apakah Anda mengalami demam [merespons Q. 1]?

- 1 Ya
- 0 Tidak **Lanjut ke Q6**
- 8 Menolak menjawab **Lanjut ke Q6**

Q.3 Kapan Anda mulai demam?

*Tuliskan "mulai demam" pada tanggal di kalender*

\_\_/\_\_/\_\_\_\_

dd/mm/yyyy

01/01/2097

Tidak tahu

01/01/2098

Menolak menjawab

Q.4 Apakah demam Anda saat ini telah berakhir?

- 1 Ya
- 0 Tidak **Lanjut ke Q6**
- 8 Menolak menjawab **Lanjut ke Q6**

Q.5 Kapan demam Anda berakhir?

*Tuliskan "demam berakhir" pada tanggal di kalender*

\_\_/\_\_/\_\_\_\_

dd/mm/yyyy

01/01/2097

Tidak tahu

01/01/2098

Menolak menjawab

Q6. Gejala apa yang Anda rasakan?

- 1 Nyeri otot
- 2 Mual
- 3 Sakit kepala
- 4 Lainnya

Q6a Gejala lainnya \_\_\_\_\_



- 
- Q7. Pada keseluruhan periode sakit, kapan Anda merasa itu terburuk?  
*Tuliskan "hari terburuk" pada tanggal*
- \_\_/\_\_/\_\_\_\_  
 01/01/2097  
 01/01/2098
- dd/mm/yyyy  
 Tidak tahu  
 Menolak menjawab
- Q8. Pada saat interview ini, apakah Anda masih merasa sakit?
- 1 Ya  
 0 Tidak
- Lanjut ke Q11**
- Q9. Apakah Anda sudah pulih sepenuhnya dari episode sakit ini?
- 1 Ya  
 0 Tidak  
 8 Menolak menjawab
- Lanjut ke Q11**  
**Lanjut ke Q11**
- Q10. Kapan Anda merasa pulih sepenuhnya pada episode sakit ini?  
*Tuliskan "pulih sepenuhnya" pada tanggal di kalender,*
- \_\_/\_\_/\_\_\_\_  
 01/01/2097  
 01/01/2098
- dd/mm/yyyy  
 Tidak tahu  
 Menolak menjawab
- Q11. Berapa lama sejak Anda merasa sakit hingga memutuskan pergi untuk mendapat layanan kesehatan? (Pilih salah satu)
- 1 Dalam 24 jam  
 2 Antara 24 and 48 jam  
 3 Setelah 48 jam  
 7 Tidak tahu  
 8 Menolak menjawab

**Perawatan yang diterima pasien dari hari merasa sakit hingga saat ini**

**Catatan pewawancara: Jika ada KDRS, Mohon mengisi Q12 dan 13 dari form Rumah Sakit**

- Q12. Apakah rumah sakit tempat Anda dirawat adalah milik pemerintah, swasta-sosial atau swasta?
- |   |                  |
|---|------------------|
| 1 | Milik pemerintah |
| 2 | Swasta - sosial  |
| 3 | Swasta           |
| 7 | Tidak tahu       |
| 8 | Menolak menjawab |
- Q13. Indikasikan tipe rumah sakit tempat Anda yang paling lama menjalani perawatan rawat inap?
- |   |                                               |
|---|-----------------------------------------------|
| 1 | Universitas, rumah sakit rujukan atau tersier |
| 2 | Rumah sakit lain                              |
| 7 | Tidak tahu                                    |
| 8 | Menolak menjawab                              |

**Rawat Inap**

**BACAKAN: Pada pertanyaan selanjutnya saya hendak mencari tahu apakah Anda menghabiskan waktu 1 atau lebih hari di rumah sakit.**

- Q14. Apakah Anda dirawat inap selama episode sakit tersebut?
- |   |                  |                                             |
|---|------------------|---------------------------------------------|
| 1 | Ya               |                                             |
| 0 | Tidak            | <b>Lanjut bacakan instruksi sebelum Q26</b> |
| 8 | Menolak menjawab | <b>Lanjut bacakan instruksi sebelum Q26</b> |
- Q14a. Kapan Anda dirawat di rumah sakit?  
*Tuliskan "masuk" pada tanggal kalender.*
- |            |                  |
|------------|------------------|
| __/__/__   | dd/mm/yy         |
| 01/01/2097 | Tidak tahu       |
| 01/01/2098 | Menolak menjawab |
- Q14b. Selama masa rawat inap, berapa malam yang Anda habiskan di rumah sakit?
- |         |                  |
|---------|------------------|
| __ . __ |                  |
| 98      | Menolak menjawab |
- Q14c. Kapan Anda keluar dari rumah sakit?  
*Tuliskan "keluar" pada tanggal kalender.*
- |            |                  |
|------------|------------------|
| __/__/__   | dd/mm/yy         |
| 01/01/2097 | Tidak tahu       |
| 01/01/2098 | Menolak menjawab |

**BACAKAN: Sekarang saya akan menanyakan beberapa pertanyaan terkait durasi rawat inap Anda, pengeluaran Anda selama perawatan dan pengeluaran lain terkait rawat inap tersebut.**

Q15. Dapatkah Anda memberi tahu saya kelas bangsal rawatan Anda selama di rumah sakit?

1. VIP
2. Kelas 1
3. Kelas 2
4. Kelas 3

Q16. Selama masa rawat inap, apakah Anda sempat dirawat di intensive care unit (ICU)?

1 Ya

0 Tidak

**Lanjut bacakan instruksi sebelum Q18**

8 Menolak menjawab

**Lanjut bacakan instruksi sebelum Q18**

Q17. Berapa hari Anda dirawat di ICU? (jika pasien dirawat di ICU selama 1 hari atau kurang, tuliskan 1)

\_\_\_ . \_\_\_  
98

Menolak menjawab

**BACAKAN: Sekarang saya akan menanyakan mengenai pengeluaran mandiri yang Anda bayar ke fasilitas kesehatan. Pengeluaran mandiri adalah jumlah uang yang Anda atau keluarga Anda bayarkan untuk biaya perawatan Anda, baik itu Anda menerima penggantian atau tidak dari jumlah tersebut selama episode sakit Anda.**

Q18. Berapa estimasi pengeluaran mandiri Anda untuk perawatan yang Anda terima selama rawat inap? (Dapat dibulatkan).  
Jika tidak ada pengeluaran, masukkan "0".

Mohon dimasukkan baik pengeluaran yang telah dibayarkan dan pengeluaran yang akan terjadi

— — — — —

7 Tidak tahu **Lanjut bacakan instruksi sebelum Q23**

8 Menolak menjawab **Lanjut bacakan instruksi sebelum Q23**

Q19. Dapatkah Anda memilah milah pengeluaran Anda berdasar jenis layanan yang Anda dapatkan selama rawat inap?

1 Ya

0 Tidak **Lanjut bacakan instruksi sebelum Q23**

7 Tidak tahu **Lanjut bacakan instruksi sebelum Q23**

8 Menolak menjawab **Lanjut bacakan instruksi sebelum Q23**

Q20. Berapa pengeluaran mandiri rumah tangga Anda yang dibayarkan untuk konsultasi, saat mulai hingga selesai rawat inap?

Jika tidak ada pengeluaran, masukkan "0".

— — — — —

7 Tidak tahu

8 Menolak menjawab

9 Tidak dapat diaplikasikan

Q21. Berapa pengeluaran mandiri rumah tangga Anda yang dibayarkan untuk uji diagnostic seperti cek darah, tes dengue, rontgen atau sonogram?

Jika tidak ada pengeluaran, masukkan "0".

— — — — —

7 Tidak tahu

8 Menolak menjawab

9 Tidak dapat diaplikasikan

Q22. Berapa pengeluaran mandiri rumah tangga Anda yang dibayarkan untuk pengobatan, cairan infus dan peralatan medis atau bank darah?

Jika tidak ada pengeluaran, masukkan "0".

— — — — —

7 Tidak tahu

8 Menolak menjawab

9 Tidak dapat diaplikasikan

**BACAKAN: Sekarang saya akan menanyakan mengenai pengeluaran Anda terkait episode penyakit dari awal hingga selesai merasa sakit [Merespons Q1], seperti untuk transportasi, makan, atau penginapan. Termasuk pengeluaran lain oleh anggota keluarga yang menemani masa rawat inap Anda, anggota keluarga lain dan kerabat.**

Q23a. Apa moda transportasi yang Anda gunakan untuk menuju ke rumah sakit? Berapa jaraknya \_\_\_\_\_

**Catatan pewawancara: jika menggunakan mobil atau motor pribadi tanyakan jaraknya, dan jika pasien tidak tahu maka gunakan google map**

Q23b. Berapa estimasi pengeluaran mandiri keluarga Anda untuk transportasi menuju rumah sakit, termasuk ambulans? Jika tidak ada pengeluaran, masukkan "0".

*Jika keluarga memiliki mobil, estimasikan jarak tempuh perjalanan (datang dan pergi) dan gunakan proxy Rp. 16.000 per km. Dan jika pasien menggunakan motor gunakan proxy Rp 14.000 per km. Jika tidak ada pengeluaran, catat "0.00".*

- 
- 7 Tidak tahu
  - 8 Menolak menjawab
  - 9 Tidak dapat diaplikasikan

Q23c. Apa moda transportasi yang Anda gunakan untuk pulang dari rumah sakit? Berapa jaraknya \_\_\_\_\_

**Catatan pewawancara: jika menggunakan mobil atau motor pribadi tanyakan jaraknya, dan jika pasien tidak tahu maka gunakan google map**

Q23d. Berapa estimasi pengeluaran mandiri keluarga Anda untuk transportasi dari rumah sakit, termasuk ambulans? Jika tidak ada pengeluaran, masukkan "0".

*Jika keluarga memiliki mobil, estimasikan jarak tempuh perjalanan (datang dan pergi) dan gunakan proxy Rp. 16.000 per km. Dan jika pasien menggunakan motor gunakan proxy Rp 14.000 per km. Jika tidak ada pengeluaran, catat "0.00".*

- 
- 7 Tidak tahu
  - 8 Menolak menjawab
  - 9 Tidak dapat diaplikasikan

Q24. Berapa estimasi pengeluaran mandiri keluarga Anda untuk makan? Jika tidak ada pengeluaran, masukkan "0".

- 
- 7 Tidak tahu
  - 8 Menolak menjawab
  - 9 Tidak dapat diaplikasikan

Q25. Berapa estimasi pengeluaran mandiri keluarga Anda untuk penginapan di fasilitas non-kesehatan seperti hotel? Jika tidak ada pengeluaran, masukkan "0".

- 
- 7 Tidak tahu
  - 8 Menolak menjawab
  - 9 Tidak dapat diaplikasikan

## Rawat Jalan

**BACAKAN:** Pertanyaan berikut ini akan terkait layanan rawat jalan sejak Anda mulai merasa hingga berakhirnya sakit [Merespons Q1]. Mohon **termasuk** perawatan dari berbagai jenis fasilitas kesehatan seperti apotek, pengobatan tradisional, klinik swasta, puskesmas, bidan, poli rawat jalan dan/atau unit gawat darurat, dan lab swasta

Q26. Apakah Anda mengunjungi fasilitas rawat jalan pada episode dengue Anda yang terakhir? (Tunjukkan form peraga 1).

- |   |                  |                         |
|---|------------------|-------------------------|
| 1 | Ya               |                         |
| 0 | Tidak            | <b>Lanjutkan ke Q40</b> |
| 8 | Menolak menjawab | <b>Lanjutkan ke Q40</b> |

**BACAKAN:** Pikirkan tentang waktu yang Anda habiskan untuk akses fasilitas kesehatan berikut selama episode sakit dimulai [tanggal pada Q1]. Kemudian spesifikkan jenis perawatan yang Anda terima pada tiap fasilitas kesehatan yang Anda kunjungi (konsultasi, uji diagnostic, dan/atau pengobatan) dan cobalah mengingat kembali jumlah pengeluaran mandiri keluarga Anda, *anggota keluarga lain dan kerabat* pada tiap jenis layanan tersebut.

Q27. Berapa kali kunjungan pada fasilitas kesehatan berikut ini selama periode sakit Anda? **Tunjukkan form 1 (kalender) dan 2 (daftar fasilitas kesehatan)**

| Visit                             | Number of visits |
|-----------------------------------|------------------|
| Apotek (01)                       |                  |
| Pengobatan tradisional (02)       |                  |
| Dokter praktek pribadi (03)       |                  |
| Puskesmas (04)                    |                  |
| Bidan (05)                        |                  |
| Poli rawat jalan rumah sakit (06) |                  |
| Unit Gawat Darurat (UGD) (07)     |                  |
| Lab swasta (08)                   |                  |
| Puskesmas pembantu (09)           |                  |
| Lainnya (10)                      |                  |
| Sebutkan lainnya _____            |                  |

Q28. Pilihlah dari berikut ini tipe fasilitas kesehatan yang Anda kunjungi selama periode sakit. Apakah Anda dapat memberi tanggal pada tiap kunjungan? (*Tunjukkan form 2 dan form 1, pilih salah satu pada tiap kunjungan*)

| Kunjungan                         | Pertama | Kedua | Ketiga | Keempat | Kelima | Keenam |
|-----------------------------------|---------|-------|--------|---------|--------|--------|
| Tanggal                           |         |       |        |         |        |        |
| <b>Type of facility</b>           |         |       |        |         |        |        |
| Apotek (01)                       |         |       |        |         |        |        |
| Pengobatan tradisional (02)       |         |       |        |         |        |        |
| Dokter praktek pribadi (03)       |         |       |        |         |        |        |
| Puskesmas (04)                    |         |       |        |         |        |        |
| Bidan (05)                        |         |       |        |         |        |        |
| Poli rawat jalan rumah sakit (06) |         |       |        |         |        |        |
| UGD (07)                          |         |       |        |         |        |        |
| Lab swasta (08)                   |         |       |        |         |        |        |
| Puskesmas pembantu (09)           |         |       |        |         |        |        |
| Lainnya (10),<br>sebutkan _____   |         |       |        |         |        |        |
| Tidak tahu (97)                   |         |       |        |         |        |        |
| Menolak menjawab (98)             |         |       |        |         |        |        |

**BACAKAN:** Sebutkan nama fasilitas kesehatan manakah yang Anda kunjungi? (Isikan kolom di samping tipe fasilitas kesehatan yang dipilih pasien)

**Catatan untuk pewawancara:** Fasilitas kesehatan “public” adalah fasilitas kesehatan yang dioperasikan oleh pemerintah dalam berbagai tingkatan, dan “swasta-sosial” adalah fasilitas kesehatan yang dioperasikan oleh organisasi sosial non-profit, “swasta” adalah dokter praktek pribadi atau klinik bersama.

Q29. Apa tipe fasilitas kesehatan yang Anda kunjungi, selama kunjungan kali ke-X Anda? Apakah fasilitas kesehatan public atau non-publik? (Pilih salah satu per kunjungan)

| Kunjungan | Publik (1) | Swasta-sosial (2) | Swasta (3) | Tidak tahu (7) | Menolak menjawab (8) |
|-----------|------------|-------------------|------------|----------------|----------------------|
| Pertama   |            |                   |            |                |                      |
| Kedua     |            |                   |            |                |                      |
| Ketiga    |            |                   |            |                |                      |
| Keempat   |            |                   |            |                |                      |
| Kelima    |            |                   |            |                |                      |
| Keenam    |            |                   |            |                |                      |

Q30. Jenis layanan apa yang Anda terima selama kunjungan kali ke-X Anda? (Cek yang diaplikasikan)

| Kunjungan | Konsultasi | Uji diagnostic seperti rontgent, sampel darah | Pengobatan medis, infus | Rujukan | Tidak tahu (7) | Menolak menjawab (8) |
|-----------|------------|-----------------------------------------------|-------------------------|---------|----------------|----------------------|
| Pertama   |            |                                               |                         |         |                |                      |
| Kedua     |            |                                               |                         |         |                |                      |
| Ketiga    |            |                                               |                         |         |                |                      |
| Keempat   |            |                                               |                         |         |                |                      |
| Kelima    |            |                                               |                         |         |                |                      |
| Keenam    |            |                                               |                         |         |                |                      |

**BACAKAN:** Sekarang saya akan menanyakan mengenai pengeluaran mandiri keluarga Anda, *anggota keluarga lain dan kerabat* terhadap fasilitas berikut ini.

**Catatan pewawancara:** *Bila memungkinkan, kroscek dengan jumlah tagihan yang tersedia dari fasilitas kesehatan.*

Q31. Mohon sebutkan perkiraan terbaik Anda dari total pengeluaran mandiri terhadap layanan yang Anda terima dari fasilitas kesehatan? Mohon termasuk pengeluaran yang telah dilakukan dan tagihan yang akan datang.

Jika tidak ada pengeluaran, mohon masukkan “0,00”

| Kunjungan | Jumlah, IDR | <b>Jika 0 lompat ke instruksi sebelum Q36a</b> | Tidak tahu (7) | <b>Lompat ke instruksi sebelum Q36a</b> | Menolak menjawab (8) | <b>Lompat ke instruksi sebelum Q36a</b> |
|-----------|-------------|------------------------------------------------|----------------|-----------------------------------------|----------------------|-----------------------------------------|
| Pertama   |             |                                                |                |                                         |                      |                                         |
| Kedua     |             |                                                |                |                                         |                      |                                         |
| Ketiga    |             |                                                |                |                                         |                      |                                         |
| Keempat   |             |                                                |                |                                         |                      |                                         |
| Kelima    |             |                                                |                |                                         |                      |                                         |
| Keenam    |             |                                                |                |                                         |                      |                                         |

Q32. Apakah Anda dapat mengurai jumlah pembayaran berdasar tipe layanan yang diterima?

| Kunjungan | Ya (1) | Tidak (0) | <b>Lompat ke<br/>instruksi<br/>sebelum Q36a</b> | Menolak<br>menjawab (8) | <b>Lompat ke<br/>instruksi<br/>sebelum Q36a</b> | Tidak dapat<br>diterapkan (9) | <b>Lompat ke<br/>instruksi<br/>sebelum<br/>Q36a</b> |
|-----------|--------|-----------|-------------------------------------------------|-------------------------|-------------------------------------------------|-------------------------------|-----------------------------------------------------|
| Pertama   |        |           |                                                 |                         |                                                 |                               |                                                     |
| Kedua     |        |           |                                                 |                         |                                                 |                               |                                                     |
| Ketiga    |        |           |                                                 |                         |                                                 |                               |                                                     |
| Keempat   |        |           |                                                 |                         |                                                 |                               |                                                     |
| Kelima    |        |           |                                                 |                         |                                                 |                               |                                                     |
| Keenam    |        |           |                                                 |                         |                                                 |                               |                                                     |

Q33. Pengeluaran mandiri pada: konsultasi. *(Jika tidak ada pembayaran tuliskan "0,00")*

| Visit   | Jumlah, IDR | Tidak tahu (7) | Menolak menjawab (8) | Tidak dapat diterapkan (9) |
|---------|-------------|----------------|----------------------|----------------------------|
| Pertama |             |                |                      |                            |
| Kedua   |             |                |                      |                            |
| Ketiga  |             |                |                      |                            |
| Keempat |             |                |                      |                            |
| Kelima  |             |                |                      |                            |
| Keenam  |             |                |                      |                            |

Q34. Pengeluaran mandiri pada: transfuse darah atau uji diagnostic seperti rontgen, sampel darah, sonogram...  
*(Jika tidak ada pembayaran tuliskan "0,00")*

| Kunjungan | Jumlah, IDR | Tidak tahu (7) | Menolak menjawab (8) | Tidak dapat diterapkan (9) |
|-----------|-------------|----------------|----------------------|----------------------------|
| Pertama   |             |                |                      |                            |
| Kedua     |             |                |                      |                            |
| Ketiga    |             |                |                      |                            |
| Keempat   |             |                |                      |                            |
| Kelima    |             |                |                      |                            |
| Keenam    |             |                |                      |                            |

Q35. Pengeluaran mandiri pada: pengobatan, set peralatan medis.  
*(Jika tidak ada pembayaran tuliskan "0,00")*

| Kunjungan | Jumlah, IDR | Tidak tahu (7) | Menolak menjawab (8) | Tidak dapat diterapkan (9) |
|-----------|-------------|----------------|----------------------|----------------------------|
| Pertama   |             |                |                      |                            |
| Kedua     |             |                |                      |                            |
| Ketiga    |             |                |                      |                            |
| Keempat   |             |                |                      |                            |
| Kelima    |             |                |                      |                            |
| Keenam    |             |                |                      |                            |

**BACAKAN:** Sekarang saya akan menanyakan terkait pengeluaran keluarga Anda spesifik untuk fasilitas kesehatan selama periode sakit seperti untuk transportasi, makan/minum, dan penginapan. Termasuk pengeluaran anggota keluarga Anda, anggota keluarga lain dan kerabat yang menemani selama kunjungan pertama (kedua, ketiga,...).



Q36a. Apakah moda transportasi yang Anda gunakan untuk menuju fasilitas kesehatan?

**Catatan pewawancara: jika menggunakan mobil atau motor pribadi, tanyakan jaraknya ke fasilitas kesehatan tersebut**

| Kunjungan | Moda Transportasi | Jarak (km) |
|-----------|-------------------|------------|
| Pertama   |                   |            |
| Kedua     |                   |            |
| Ketiga    |                   |            |
| Keempat   |                   |            |
| Kelima    |                   |            |
| Keenam    |                   |            |

Q36b. Mohon sebutkan perkiraan terbaik Anda terkait pengeluaran mandiri untuk transportasi menuju fasilitas kesehatan)

*Jika keluarga memiliki kendaraan, perkirakan jarak tempuh perjalanan (pulang-pergi) dan gunakan IDR 16,000 per Km sebagai acuan dengan mobil dan IDR 14,000 per Km bila dengan motor. Jika tidak ada pengeluaran tuliskan "0,00".*

| Kunjungan | Jumlah, IDR | Tidak tahu (7) | Menolak menjawab (8) | Tidak dapat diterapkan (9) |
|-----------|-------------|----------------|----------------------|----------------------------|
| Pertama   |             |                |                      |                            |
| Kedua     |             |                |                      |                            |
| Ketiga    |             |                |                      |                            |
| Keempat   |             |                |                      |                            |
| Kelima    |             |                |                      |                            |
| Keenam    |             |                |                      |                            |

Q36c. Apakah moda transportasi yang Anda gunakan dari fasilitas kesehatan?

**Catatan pewawancara: jika menggunakan mobil atau motor pribadi, tanyakan jaraknya ke fasilitas kesehatan tersebut**

| Kunjungan | Moda Transportasi | Jarak (km) |
|-----------|-------------------|------------|
| Pertama   |                   |            |
| Kedua     |                   |            |
| Ketiga    |                   |            |
| Keempat   |                   |            |
| Kelima    |                   |            |
| Keenam    |                   |            |

Q36d. Mohon sebutkan perkiraan terbaik Anda terkait pengeluaran mandiri untuk transportasi dari fasilitas kesehatan)

*Jika keluarga memiliki kendaraan, perkirakan jarak tempuh perjalanan (pulang-pergi) dan gunakan IDR 16,000 per Km sebagai acuan dengan mobil dan IDR 14,000 per Km bila dengan motor. Jika tidak ada pengeluaran tuliskan "0,00".*

| Kunjungan | Jumlah, IDR | Tidak tahu (7) | Menolak menjawab (8) | Tidak dapat diterapkan (9) |
|-----------|-------------|----------------|----------------------|----------------------------|
| Pertama   |             |                |                      |                            |
| Kedua     |             |                |                      |                            |
| Ketiga    |             |                |                      |                            |
| Keempat   |             |                |                      |                            |
| Kelima    |             |                |                      |                            |
| Keenam    |             |                |                      |                            |

Q37. Mohon sebutkan perkiraan terbaik Anda terkait pengeluaran mandiri untuk makan/minum.  
 Jika tidak ada pengeluaran tuliskan "0,00".

| Kunjungan | Jumlah, IDR | Tidak tahu (7) | Menolak menjawab (8) | Tidak dapat diterapkan (9) |
|-----------|-------------|----------------|----------------------|----------------------------|
| Pertama   |             |                |                      |                            |
| Kedua     |             |                |                      |                            |
| Ketiga    |             |                |                      |                            |
| Keempat   |             |                |                      |                            |
| Kelima    |             |                |                      |                            |
| Keenam    |             |                |                      |                            |

Q38. Mohon sebutkan perkiraan terbaik Anda terkait pengeluaran mandiri untuk penginapan seperti hotel.  
 Jika tidak ada pengeluaran tuliskan "0,00".

| Kunjungan | Jumlah, IDR | Tidak tahu (7) | Menolak menjawab (8) | Tidak dapat diterapkan (9) |
|-----------|-------------|----------------|----------------------|----------------------------|
| Pertama   |             |                |                      |                            |
| Kedua     |             |                |                      |                            |
| Ketiga    |             |                |                      |                            |
| Keempat   |             |                |                      |                            |
| Kelima    |             |                |                      |                            |
| Keenam    |             |                |                      |                            |

Q39. Apakah ada fasilitas kesehatan lain yang Anda kunjungi selama periode sakit dimulai dari saat Anda mulai merasa sakit?  
 [Respons terhadap Q1]?

1 Ya **Ulangi proses dari Q28 hingga Q39**  
 0 Tidak

**Dampak penyakit pada anggota keluarga, anggota keluarga lain dan kerabat selama periode sakit sejak awal hingga selesai**  
**[Respons terhadap Q1]**

**BACAKAN:** Saya akan mempelajari bagaimana sakit DBD Anda terakhir yang dimulai sejak [tanggal] yang mempengaruhi Anda dan keluarga Anda, anggota keluarga lain dan kerabat.

**BACAKAN:** Mari kita bicara tentang Anda terlebih dahulu.

**Pasien**

Q40. Mohon tuliskan jenis kelamin pasien tanpa menanyakan kepadanya. 1 Laki-laki  
 2 Perempuan

Q41. Berapa usia Anda saat ini? \_\_\_\_\_  
 999 Tidak tahu  
 998 Menolak menjawab

Q41a. Kapan tanggal lahir Anda (hari/bulan/tahun)?  
 \_\_\_\_/\_\_\_\_/\_\_\_\_ dd/mm/yyyy  
 01/01/2097 Tidak tahu  
 01/01/2098 Menolak menjawab

Q42. Apa tingkat pendidikan terakhir yang Anda selesaikan? (Pilih salah satu)

*Tunjukkan Form 3*

- 01 Tidak dapat baca-tulis
- 02 Mampu baca-tulis namun tidak sekolah
- 03 Sekolah tapi hanya satu tahun
- 04 Taman kanak - kanak
- 05 Sekolah Dasar
- 06 Sekolah Menengah Pertama
- 07 Sekolah Menengah Atas
- 08 Diploma
- 09 Universitas, Sarjana
- 10 Universitas, Pasca Sarjana (Magister, Doktoral)
- 11 Ijazah profesi
- 97 Tidak tahu
- 98 Menolak menjawab
- 99 Tidak dapat diaplikasikan

Q43. Apakah Anda saat ini sedang menempuh pendidikan?

- 1 Ya
- 0 Tidak **Lanjut ke Q46**
- 8 Menolak menjawab **Lanjut ke Q46**

Q44. Apakah Anda kehilangan waktu sekolah Anda selama sakit?

- 1 Ya
- 0 Tidak **Lanjut ke Q46**
- 8 Menolak menjawab

Q45. Berapa hari sekolah Anda yang hilang karena sakit?

Tuliskan "0" jika tidak ada

- 97 Tidak tahu
- 98 Menolak menjawab
- 99 Tidak dapat diterapkan

Q46. Apakah Anda bekerja dan dibayar?

- 1 Ya
- 0 Tidak **Lanjut ke Q51a**
- 8 Menolak menjawab

Q47. Apakah Anda kehilangan hari kerja selama sakit?

*Jika pasien tidak kehilangan hari kerja, mohon konfirmasi apakah kehilangan pendapatan.*

- 1 Ya
- 0 Tidak **Lanjut ke Q51a**
- 7 Tidak tahu **Lanjut ke Q51a**
- 8 Menolak menjawab **Lanjut ke Q51a**

Q48. Berapa hari kerja Anda yang hilang selama sakit?

Tuliskan "0" jika tidak ada

- 97 Tidak tahu
- 98 Menolak menjawab
- 99 Tidak dapat diterapkan

Q49. Apakah Anda menerima kompensasi (tidak potong gaji) selama Anda sakit, apakah itu tempat kerja Anda atau pihak lain yang menanggung selama Anda sakit?

- 1 Ya
- 0 Tidak **Lanjut ke Q51a**
- 7 Tidak tahu **Lanjut ke Q51a**
- 8 Menolak menjawab **Lanjut ke Q51a**
- 9 Tidak dapat diterapkan **Lanjut ke Q51a**

Q50. Berapa hari gaji yang Anda terima selama sakit?  
Tuliskan "0" jika tidak ada

- 97 \_\_\_\_\_ Tidak tahu
- 98 Menolak menjawab
- 99 Tidak dapat diterapkan

Q51a. Apakah Anda kehilangan pendapatan selama sakit?

- 1 Ya
- 0 Tidak **lanjut ke Q52**
- 7 Tidak tahu **lanjut ke Q52**
- 8 Menolak menjawab **lanjut ke Q52**

Q51b. Berapa pengeluaran Anda yang hilang? (Berikan perkiraan terbaik Anda)

- \_\_\_\_\_ 7 Tidak tahu
- 8 Menolak menjawab
- 9 Tidak dapat diterapkan

Q52. Apakah Anda menerima bantuan keuangan atau non-keuangan dari keluarga atau komunitas selama Anda sakit?

- 1 Ya
- 0 Tidak **Lanjut ke Q55**
- 8 Menolak menjawab **Lanjut ke Q55**

Q53. Berapa perkiraan terbaik Anda nilai bantuan non-keuangan yang Anda dapatkan?  
*Benar 0 jika tidak ada bantuan non-keuangan.*  
Tuliskan "0" jika tidak ada

- 97 \_\_\_\_\_ Tidak tahu
- 98 Menolak menjawab
- 99 Tidak dapat diterapkan

**Catatan pewawancara: Jika tidak tahu, tuliskan jenis bantuan non-keuangan yang diterima pasien dan keluarga** \_\_\_\_\_

---

Q54. Berapakah total bantuan keuangan yang Anda dapatkan dalam IDR?  
Tuliskan "0" jika tidak ada

- 97 \_\_\_\_\_ Tidak tahu
- 98 Menolak menjawab
- 99 Tidak dapat diterapkan

### Jumlah Anggota Keluarga

Q55. Berapa jumlah anggota keluarga selain Anda?

00

No!

**Akhiri wawancara**

98

Menolak menjawab

Q56. Berapa anggota keluarga yang terdampak sakit Anda secara langsung selama periode sakit Anda?

**BACAKAN:** Anggota keluarga adalah mereka yang tinggal bersama Anda dan berbagi makanan. Anggota keluarga terdampak jika dia menghabiskan uang dan waktu lebih dari jumlah biasanya karena merawat Anda atau kehilangan waktu kerja, pendapatan, sekolah karena sakit Anda.

00

No!

**Akhiri wawancara**

98

Menolak menjawab

**Akhiri wawancara**

**BACAKAN:** Sekarang saya akan menanyakan Anda terkait anggota keluarga Anda yang terdampak penyakit Anda. [Respons terhadap Q56].

### Mereka yang merawat

Q57. Apa hubungan Anda dengan anggota keluarga (pertama, kedua,...) Anda? (pilih salah satu)

*Tunjukkan form 4*

| Hubungan                       | Anggota Keluarga |               |                |                 |                |                |                 |                   |
|--------------------------------|------------------|---------------|----------------|-----------------|----------------|----------------|-----------------|-------------------|
|                                | Anggota pertama  | Anggota kedua | Anggota ketiga | Anggota keempat | Anggota kelima | Anggota keenam | Anggota ketujuh | Anggota kedelapan |
| Ibu (01)                       |                  |               |                |                 |                |                |                 |                   |
| Ayah (02)                      |                  |               |                |                 |                |                |                 |                   |
| Suami (03)                     |                  |               |                |                 |                |                |                 |                   |
| Istri (04)                     |                  |               |                |                 |                |                |                 |                   |
| Teman serumah (05)             |                  |               |                |                 |                |                |                 |                   |
| Saudara perempuan (06)         |                  |               |                |                 |                |                |                 |                   |
| Saudara laki-laki (07)         |                  |               |                |                 |                |                |                 |                   |
| Anak laki-laki (08)            |                  |               |                |                 |                |                |                 |                   |
| Anak perempuan (09)            |                  |               |                |                 |                |                |                 |                   |
| Nenek (10)                     |                  |               |                |                 |                |                |                 |                   |
| Kakek (11)                     |                  |               |                |                 |                |                |                 |                   |
| Paman (12)                     |                  |               |                |                 |                |                |                 |                   |
| Bibi (13)                      |                  |               |                |                 |                |                |                 |                   |
| Pembantu (14)                  |                  |               |                |                 |                |                |                 |                   |
| Pengasuh (15)                  |                  |               |                |                 |                |                |                 |                   |
| Lainnya (16)<br>sebutkan _____ |                  |               |                |                 |                |                |                 |                   |
| Menolak menjawab (98)          |                  |               |                |                 |                |                |                 |                   |

Q58. Berapa usia anggota keluarga Anda?

| Anggota keluarga  | Usia dalam tahun | Tidak tahu (997) | Menolak menjawab (998) |
|-------------------|------------------|------------------|------------------------|
| Anggota pertama   |                  |                  |                        |
| Anggota kedua     |                  |                  |                        |
| Anggota ketiga    |                  |                  |                        |
| Anggota keempat   |                  |                  |                        |
| Anggota kelima    |                  |                  |                        |
| Anggota keenam    |                  |                  |                        |
| Anggota ketujuh   |                  |                  |                        |
| Anggota kedelapan |                  |                  |                        |

Q59. Apa tingkat pendidikan terakhir anggota keluarga Anda? (pilih salah satu)

*Tunjukkan form 3*

| Hubungan                                             | Anggota Keluarga |               |                |                 |                |                |                 |                   |
|------------------------------------------------------|------------------|---------------|----------------|-----------------|----------------|----------------|-----------------|-------------------|
|                                                      | Anggota pertama  | Anggota kedua | Anggota ketiga | Anggota keempat | Anggota kelima | Anggota keenam | Anggota ketujuh | Anggota kedelapan |
| Tidak dapat baca-tulis (01)                          |                  |               |                |                 |                |                |                 |                   |
| Mampu baca-tulis namun tidak sekolah (02)            |                  |               |                |                 |                |                |                 |                   |
| Sekolah tapi hanya satu tahun (03)                   |                  |               |                |                 |                |                |                 |                   |
| Taman kanak - kanak (04)                             |                  |               |                |                 |                |                |                 |                   |
| Sekolah Dasar (05)                                   |                  |               |                |                 |                |                |                 |                   |
| Sekolah Menengah Pertama (06)                        |                  |               |                |                 |                |                |                 |                   |
| Sekolah Menengah Atas (07)                           |                  |               |                |                 |                |                |                 |                   |
| Diploma (08)                                         |                  |               |                |                 |                |                |                 |                   |
| Universitas, Sarjana (09)                            |                  |               |                |                 |                |                |                 |                   |
| Universitas, Pasca Sarjana (Magister, Doktoral) (10) |                  |               |                |                 |                |                |                 |                   |
| Ijazah profesi (11)                                  |                  |               |                |                 |                |                |                 |                   |
| Tidak tahu (97)                                      |                  |               |                |                 |                |                |                 |                   |
| Menolak menjawab (98)                                |                  |               |                |                 |                |                |                 |                   |
| Tidak dapat diaplikasikan (99)                       |                  |               |                |                 |                |                |                 |                   |

Q60. Apakah anggota keluarga Anda saat ini sedang menempuh pendidikan?

| Anggota keluarga  | Ya (kode:1) | Tidak (Kode:2) | <b>Lanjut ke Q62</b> | Tidak tahu (Kode:7) | <b>Lanjut ke Q62</b> | Menolak menjawab (Kode:8) | <b>Lanjut ke Q62</b> |
|-------------------|-------------|----------------|----------------------|---------------------|----------------------|---------------------------|----------------------|
| Anggota pertama   |             |                |                      |                     |                      |                           |                      |
| Anggota kedua     |             |                |                      |                     |                      |                           |                      |
| Anggota ketiga    |             |                |                      |                     |                      |                           |                      |
| Anggota keempat   |             |                |                      |                     |                      |                           |                      |
| Anggota kelima    |             |                |                      |                     |                      |                           |                      |
| Anggota keenam    |             |                |                      |                     |                      |                           |                      |
| Anggota ketujuh   |             |                |                      |                     |                      |                           |                      |
| Anggota kedelapan |             |                |                      |                     |                      |                           |                      |

Q61. Apakah anggota keluarga Anda kehilangan hari sekolah karena penyakit Anda?

| Anggota keluarga  | Ya (kode:1) | Tidak (Kode:2) | <b>Lanjut ke Q62</b> | Tidak tahu (Kode:7) | <b>Lanjut ke Q62</b> | Menolak menjawab (Kode:8) | <b>Lanjut ke Q62</b> |
|-------------------|-------------|----------------|----------------------|---------------------|----------------------|---------------------------|----------------------|
| Anggota pertama   |             |                |                      |                     |                      |                           |                      |
| Anggota kedua     |             |                |                      |                     |                      |                           |                      |
| Anggota ketiga    |             |                |                      |                     |                      |                           |                      |
| Anggota keempat   |             |                |                      |                     |                      |                           |                      |
| Anggota kelima    |             |                |                      |                     |                      |                           |                      |
| Anggota keenam    |             |                |                      |                     |                      |                           |                      |
| Anggota ketujuh   |             |                |                      |                     |                      |                           |                      |
| Anggota kedelapan |             |                |                      |                     |                      |                           |                      |

Q62. Berapa hari sekolah anggota keluarga yang hilang karena penyakit Anda?

Tuliskan "0" jika tidak ada

| Anggota keluarga  | Jumlah hari yang hilang | Tidak tahu (97) | Menolak menjawab (98) |
|-------------------|-------------------------|-----------------|-----------------------|
| Anggota pertama   |                         |                 |                       |
| Anggota kedua     |                         |                 |                       |
| Anggota ketiga    |                         |                 |                       |
| Anggota keempat   |                         |                 |                       |
| Anggota kelima    |                         |                 |                       |
| Anggota keenam    |                         |                 |                       |
| Anggota ketujuh   |                         |                 |                       |
| Anggota kedelapan |                         |                 |                       |

Q63. Apakah anggota keluarga Anda bekerja dan dibayar?

| Anggota keluarga  | Ya (kode:1) | Tidak (Kode:2) | Lanjut ke Q67a | Tidak tahu (Kode:7) | Lanjut ke Q67a | Menolak menjawab (Kode:8) | Lanjut ke Q67a |
|-------------------|-------------|----------------|----------------|---------------------|----------------|---------------------------|----------------|
| Anggota pertama   |             |                |                |                     |                |                           |                |
| Anggota kedua     |             |                |                |                     |                |                           |                |
| Anggota ketiga    |             |                |                |                     |                |                           |                |
| Anggota keempat   |             |                |                |                     |                |                           |                |
| Anggota kelima    |             |                |                |                     |                |                           |                |
| Anggota keenam    |             |                |                |                     |                |                           |                |
| Anggota ketujuh   |             |                |                |                     |                |                           |                |
| Anggota kedelapan |             |                |                |                     |                |                           |                |

Q64. Apakah anggota keluarga Anda kehilangan hari kerja karena penyakit Anda?

| Anggota keluarga  | Ya (kode:1) | Tidak (Kode:2) | Lanjut ke Q67a | Tidak tahu (Kode:7) | Lanjut ke Q67a | Menolak menjawab (Kode:8) | Lanjut ke Q67 |
|-------------------|-------------|----------------|----------------|---------------------|----------------|---------------------------|---------------|
| Anggota pertama   |             |                |                |                     |                |                           |               |
| Anggota kedua     |             |                |                |                     |                |                           |               |
| Anggota ketiga    |             |                |                |                     |                |                           |               |
| Anggota keempat   |             |                |                |                     |                |                           |               |
| Anggota kelima    |             |                |                |                     |                |                           |               |
| Anggota keenam    |             |                |                |                     |                |                           |               |
| Anggota ketujuh   |             |                |                |                     |                |                           |               |
| Anggota kedelapan |             |                |                |                     |                |                           |               |

Q65. Berapa hari kerja anggota keluarga yang hilang karena penyakit Anda?

Tuliskan "0" jika tidak ada

| Anggota keluarga | Jumlah hari | Tidak tahu (Kode:97) | Lanjut ke Q68 | Menolak menjawab (Kode:98) | Lanjut ke Q68 | Tidak dapat diterapkan (Kode:99) | Lanjut ke Q68 |
|------------------|-------------|----------------------|---------------|----------------------------|---------------|----------------------------------|---------------|
| Anggota pertama  |             |                      |               |                            |               |                                  |               |
| Anggota kedua    |             |                      |               |                            |               |                                  |               |
| Anggota ketiga   |             |                      |               |                            |               |                                  |               |
| Anggota keempat  |             |                      |               |                            |               |                                  |               |
| Anggota kelima   |             |                      |               |                            |               |                                  |               |
| Anggota keenam   |             |                      |               |                            |               |                                  |               |
| Anggota ketujuh  |             |                      |               |                            |               |                                  |               |



|                   |  |  |  |  |  |  |  |
|-------------------|--|--|--|--|--|--|--|
| Anggota kedelapan |  |  |  |  |  |  |  |
|-------------------|--|--|--|--|--|--|--|

Q66. Apakah anggota keluarga menerima kompensasi atas absennya mereka dari pekerjaan ketika merawat Anda sakit? (dari tempat kerja atau pihak yang menanggung)

| Anggota keluarga  | Ya (Kode: 1) | Tidak (Kode: 0) | Lanjut ke Q67a | Tidak tahu (Kode:7) | Lanjut ke Q67a | Menolak menjawab (Kode:8) | Lanjut ke Q67a | Tidak dapat diterapkan (Kode:9) | Lanjut ke Q67a |
|-------------------|--------------|-----------------|----------------|---------------------|----------------|---------------------------|----------------|---------------------------------|----------------|
| Anggota pertama   |              |                 |                |                     |                |                           |                |                                 |                |
| Anggota kedua     |              |                 |                |                     |                |                           |                |                                 |                |
| Anggota ketiga    |              |                 |                |                     |                |                           |                |                                 |                |
| Anggota keempat   |              |                 |                |                     |                |                           |                |                                 |                |
| Anggota kelima    |              |                 |                |                     |                |                           |                |                                 |                |
| Anggota keenam    |              |                 |                |                     |                |                           |                |                                 |                |
| Anggota ketujuh   |              |                 |                |                     |                |                           |                |                                 |                |
| Anggota kedelapan |              |                 |                |                     |                |                           |                |                                 |                |

Q67. Berapa hari kerja yang didapat ke anggota keluarga Anda?

| Anggota keluarga  | Jumlah hari yang dibayarkan | Tidak tahu (97) | Menolak menjawab (98) |
|-------------------|-----------------------------|-----------------|-----------------------|
| Anggota pertama   |                             |                 |                       |
| Anggota kedua     |                             |                 |                       |
| Anggota ketiga    |                             |                 |                       |
| Anggota keempat   |                             |                 |                       |
| Anggota kelima    |                             |                 |                       |
| Anggota keenam    |                             |                 |                       |
| Anggota ketujuh   |                             |                 |                       |
| Anggota kedelapan |                             |                 |                       |

Q67a. Apakah anggota keluarga Anda kehilangan pendapatan karena penyakit Anda?

| Anggota keluarga  | Ya (kode:1) | Tidak (Kode:2) | Lanjut ke Q68 | Tidak tahu (Kode:7) | Lanjut ke Q68 | Menolak menjawab (Kode:8) | Lanjut ke Q68 |
|-------------------|-------------|----------------|---------------|---------------------|---------------|---------------------------|---------------|
| Anggota pertama   |             |                |               |                     |               |                           |               |
| Anggota kedua     |             |                |               |                     |               |                           |               |
| Anggota ketiga    |             |                |               |                     |               |                           |               |
| Anggota keempat   |             |                |               |                     |               |                           |               |
| Anggota kelima    |             |                |               |                     |               |                           |               |
| Anggota keenam    |             |                |               |                     |               |                           |               |
| Anggota ketujuh   |             |                |               |                     |               |                           |               |
| Anggota kedelapan |             |                |               |                     |               |                           |               |

Q67b. Berapa pendapatan anggota keluarga Anda yang hilang? (Mohon berikan perkiraan terbaik).

*Jika tidak ada tuliskan "0,00".*

| Anggota keluarga | Jumlah, IDR | Tidak tahu (7) | Menolak menjawab (8) | Tidak dapat diterapkan (9) |
|------------------|-------------|----------------|----------------------|----------------------------|
| Anggota pertama  |             |                |                      |                            |
| Anggota kedua    |             |                |                      |                            |
| Anggota ketiga   |             |                |                      |                            |

|                   |  |  |  |  |
|-------------------|--|--|--|--|
| Anggota keempat   |  |  |  |  |
| Anggota kelima    |  |  |  |  |
| Anggota keenam    |  |  |  |  |
| Anggota ketujuh   |  |  |  |  |
| Anggota kedelapan |  |  |  |  |

Q68. Dari jumlah hari sakit selama episode sakit Anda yang dimulai sejak sakit hingga saat pemulihan (tanggal wawancara), berapa jumlah hari tambahan yang dihabiskan anggota keluarga untuk perawatan lanjutan Anda?

*Jika tidak ada, masukkan 0*

| Anggota keluarga  | Jumlah hari | <b>Jika "No"<br/>Lanjut ke Q70</b> | Tidak tahu (Kode:97) | <b>Lanjut ke Q70</b> | Menolak menjawab (Kode:98) | <b>Lanjut ke Q70</b> | Tidak dapat diterapkan (Kode:99) | <b>Lanjut ke Q70</b> |
|-------------------|-------------|------------------------------------|----------------------|----------------------|----------------------------|----------------------|----------------------------------|----------------------|
| Anggota pertama   |             |                                    |                      |                      |                            |                      |                                  |                      |
| Anggota kedua     |             |                                    |                      |                      |                            |                      |                                  |                      |
| Anggota ketiga    |             |                                    |                      |                      |                            |                      |                                  |                      |
| Anggota keempat   |             |                                    |                      |                      |                            |                      |                                  |                      |
| Anggota kelima    |             |                                    |                      |                      |                            |                      |                                  |                      |
| Anggota keenam    |             |                                    |                      |                      |                            |                      |                                  |                      |
| Anggota ketujuh   |             |                                    |                      |                      |                            |                      |                                  |                      |
| Anggota kedelapan |             |                                    |                      |                      |                            |                      |                                  |                      |

**BACAKAN:** Dari pertanyaan berikut, pikirkan tentang jumlah tambahan jam per hari yang Anda dapatkan dari anggota keluarga. Tambahan jam merujuk pada jumlah jam diluar biasanya anggota keluarga menghabiskan waktu bersama Anda. Dalam memperkirakan waktu, mohon masukkan waktu di rumah, pada fasilitas kesehatan dan selama perjalanan menuju dan dari fasilitas kesehatan.

Q69. Selama periode ini, berapa rata – rata jumlah tambahan jam anggota keluarga untuk merawat Anda? [Respons terhadap Q68]

*Jika tidak ada, masukkan 0*

| Anggota keluarga  | Rata-rata tambahan jam untuk perawatan harian | Tidak tahu (Kode:97) | Menolak menjawab (Kode:98) | Tidak dapat diterapkan (Kode:99) |
|-------------------|-----------------------------------------------|----------------------|----------------------------|----------------------------------|
| Anggota pertama   |                                               |                      |                            |                                  |
| Anggota kedua     |                                               |                      |                            |                                  |
| Anggota ketiga    |                                               |                      |                            |                                  |
| Anggota keempat   |                                               |                      |                            |                                  |
| Anggota kelima    |                                               |                      |                            |                                  |
| Anggota keenam    |                                               |                      |                            |                                  |
| Anggota ketujuh   |                                               |                      |                            |                                  |
| Anggota kedelapan |                                               |                      |                            |                                  |

Q70. Apakah ada pengeluaran transportasi, makan/minum dan penginapan tambahan dari yang telah disebutkan sebelumnya untuk mengunjungi fasilitas kesehatan?

| Anggota keluarga  | Ya (Kode:1) | No (Kode:0) | Lanjut ke anggota keluarga lainnya | Tidak tahu (Kode:7) | Lanjut ke anggota keluarga lainnya | Menolak menjawab (Kode:8) | Lanjut ke anggota keluarga lainnya | Tidak dapat diterapkan (Kode:9) | Lanjut ke anggota keluarga lainnya |
|-------------------|-------------|-------------|------------------------------------|---------------------|------------------------------------|---------------------------|------------------------------------|---------------------------------|------------------------------------|
| Anggota pertama   |             |             |                                    |                     |                                    |                           |                                    |                                 |                                    |
| Anggota kedua     |             |             |                                    |                     |                                    |                           |                                    |                                 |                                    |
| Anggota ketiga    |             |             |                                    |                     |                                    |                           |                                    |                                 |                                    |
| Anggota keempat   |             |             |                                    |                     |                                    |                           |                                    |                                 |                                    |
| Anggota kelima    |             |             |                                    |                     |                                    |                           |                                    |                                 |                                    |
| Anggota keenam    |             |             |                                    |                     |                                    |                           |                                    |                                 |                                    |
| Anggota ketujuh   |             |             |                                    |                     |                                    |                           |                                    |                                 |                                    |
| Anggota kedelapan |             |             |                                    |                     |                                    |                           |                                    |                                 |                                    |

Q71. Untuk pertanyaan berikut ini, berikan perkiraan terbaik terhadap jumlah total tambahan pengeluaran dari tambahan hari untuk merawat Anda yang belum termasuk yang disebutkan pada pertanyaan sebelumnya? [Jumlah hari yang dilaporkan pada Q68]  
*Jika tidak ada pengeluaran, tuliskan "0,00".*

| Anggota keluarga  | Amount, IDR | Tidak tahu (7) | Menolak menjawab (8) | Tidak dapat diterapkan (9) |
|-------------------|-------------|----------------|----------------------|----------------------------|
| Anggota pertama   |             |                |                      |                            |
| Anggota kedua     |             |                |                      |                            |
| Anggota ketiga    |             |                |                      |                            |
| Anggota keempat   |             |                |                      |                            |
| Anggota kelima    |             |                |                      |                            |
| Anggota keenam    |             |                |                      |                            |
| Anggota ketujuh   |             |                |                      |                            |
| Anggota kedelapan |             |                |                      |                            |

*Cek Q56, jika jawabannya lebih dari 1, maka ulangi Q57-71 untuk semua anggota keluarga terdaftar. Jika Q56 sama dengan 1, maka bacakan kalimat berikut untuk mengakhiri wawancara.*

**BACAKAN:** Terima kasih atas partisipasi Anda! Jika ada pertanyaan lebih lanjut terkait wawancara atau hasil penelitian ini, Anda dapat menghubungi saya, dr. Nandyan N. Wilastonegoro, MScIH di nomor 0813-2884-3888 atau 0274-5306089 di Fakultas Kedokteran, Kesehatan Masyarakat dan Keperawatan, Universitas Gadjah Mada (FKKMK UGM).

## **Supplementary Information**

### **Cost of dengue illness in Indonesia across hospital, ambulatory and non-medical settings**

S3: Questionnaire S3. Pediatric questionnaire (patients under age 18) in English

Child confirmed Dengue Patient Questionnaire (Age ≤ 17)

Name of child patient \_\_\_\_\_  
 Patient study ID \_\_\_\_\_  
 Name of the interviewee (proxy) \_\_\_\_\_  
 Date of interview \_\_\_\_\_

**Interviewer**

Q0. The name of the site the patient was recruited from. (Choose one)

- 1 Hospital \_\_\_\_\_
- 2 Health Center \_\_\_\_\_
- 3 Outside professional health system through (name of community health worker) \_\_\_\_\_

Q00. Interviewee

- 1 Patient him/herself
- 2 Patient's proxy

**READ:** Now we are going to talk about [Child's name] illness period. I will give you a calendar that will help you answer the following questions.

Show calendar flashcard (form 1) to the proxy for the following questions and continue to use through Q39. Write "today" in the box for today's date.

Q1. When did [Child's name] start feeling ill?

Write "illness started" on that date in the calendar.

- \_\_\_/\_\_\_/\_\_\_ dd/mm/yyyy
- 01/01/2097 Don't Know
- 01/01/2098 Refuse to Answer

Q2. Did [Child name] have fever during this illness episode that started in [date in Q1]?

- 1 Yes
- 0 No **Skip to Q6**
- 8 Refuse to Answer **Skip to Q6**

Q.3 When did [Child's name]'s fever start?

Write "fever started" on that date in the calendar,

- \_\_\_/\_\_\_/\_\_\_ dd/mm/yyyy
- 01/01/2097 Don't Know
- 01/01/2098 Refuse to Answer

Q.4 Did [Child's name]'s fever end?

- 1 Yes
- 0 No **Skip to Q6**
- 8 Refuse to Answer **Skip to Q6**

Q.5 When did [Child's name]'s fever end?

Write "fever ended" on that date in the calendar,

- \_\_\_/\_\_\_/\_\_\_ dd/mm/yyyy
- 01/01/2097 Don't Know
- 01/01/2098 Refuse to Answer

Q6. What other symptoms did [Child name] have?

- 1 Myalgia
- 2 Nausea
- 3 Headache

- Q6a Other Symptoms \_\_\_\_\_  
\_\_\_\_\_  
\_\_\_\_\_
- Q7. Over [Child’s name]’s entire illness, on which day did [Child’s name] feel worst?  
Write “worst day” on that date in the calendar,                 \_\_/\_\_/\_\_\_\_                 dd/mm/yyyy  
01/01/2097                 Don’t Know  
01/01/2098                 Refuse to Answer
- Q8. At the time of this interview, is [Child’s name] still feeling ill?                 1           Yes                 ***Skip to Q11***  
0           No
- Q9. Have [Child’s name] recovered completely from this illness period?                 1           Yes  
0           No                                 ***Skip to Q11***  
8           Refused to Answer                 ***Skip to Q11***
- Q10. When did [Child’s name] fully recover from the illness episode?  
Write “recovered completely” on that date in the calendar,                 \_\_/\_\_/\_\_\_\_                 dd/mm/yyyy  
01/01/2097                 Don’t Know  
01/01/2098                 Refuse to Answer
- Q11. How soon after [Child’s name] started to feel ill did he/she first receive care by a medical care provider? (Choose one)  
1           Within 24 hours  
2           Between 24 and 48 hours  
3           After 48 hours  
7           Don’t Know  
8           Refused to Answer

Care received by child from the day he/she started feeling ill until today

**NOTE to interviewer: if you have forms from hospital please fill Q12 and 13 from the hospital form**

- Q12. Is the hospital where the patient was admitted a public, social-private, or private?
- |   |                  |
|---|------------------|
| 1 | Public           |
| 2 | Social-private   |
| 3 | Private          |
| 7 | Don't Know       |
| 8 | Refuse to Answer |

- Q13. Indicate the type of hospital in which you spent the most number of nights?
- |   |                                           |
|---|-------------------------------------------|
| 1 | University, tertiary or referral hospital |
| 2 | Other hospital                            |
| 7 | Don't Know                                |
| 8 | Refuse to Answer                          |

**Hospitalization**

- Q14. Were [child name] hospitalized during this interview period?
- |   |                   |                                       |
|---|-------------------|---------------------------------------|
| 1 | Yes               |                                       |
| 0 | No                | <b>Skip to instruction before Q26</b> |
| 8 | Refused to answer | <b>Skip to instruction before Q26</b> |

- Q14a. When were [child's name] admitted to the hospital
- Write "admission" on that date in the calendar,
- |                                   |                  |
|-----------------------------------|------------------|
| <u>  </u> / <u>  </u> / <u>  </u> | dd/mm/yyyy       |
| 01/01/2097                        | Don't Know       |
| 01/01/2098                        | Refuse to Answer |

- Q14b. During this hospitalization, for how many nights did [child name] stay in the hospital?
- |    |                                           |
|----|-------------------------------------------|
| 98 | <u>  </u> <u>  </u> . <u>  </u> <u>  </u> |
|    | Refuse to Answer                          |

- Q14c. When were [child's name] discharged the hospital
- Write "discharged" on that date in the calendar,
- |                                   |                  |
|-----------------------------------|------------------|
| <u>  </u> / <u>  </u> / <u>  </u> | dd/mm/yyyy       |
| 01/01/2097                        | Don't Know       |
| 01/01/2098                        | Refuse to Answer |

**READ: Now I would like to ask you some questions on the duration of [child name's] hospitalization, the out-of-pocket payments you made for treatment and other spending related to this hospitalization.**

- Q15. Can you please tell me which type of hospital ward/class did [child's name] stay at for the majority of his/her hospital stay?
- |   |         |
|---|---------|
| 1 | VIP     |
| 2 | Class 1 |
| 3 | Class 2 |
| 4 | Class 3 |

- Q16. During [child name] hospitalization, did [child name] stay any night in an intensive care unit?
- |   |                  |                                       |
|---|------------------|---------------------------------------|
| 1 | Yes              |                                       |
| 0 | No               | <b>Skip to instruction before Q18</b> |
| 8 | Refuse to Answer | <b>Skip to instruction before Q18</b> |
- Q17. For how many nights did [child name] stay in the intensive care unit? (if patient stayed in the intensive care unit for one night or less then mark "1".
- |       |    |       |                  |
|-------|----|-------|------------------|
| _____ | 98 | _____ | Refuse to Answer |
|-------|----|-------|------------------|

**READ: Now I will ask about the out-of-pocket payments [child name]'s family made in this facility. The household out-of-pocket payments are the total amounts paid by you or your family for your treatment, whether or not you received reimbursement for all or part of this paid amount during this interview period.**

- Q18. Please report your best estimate of the total out-of-pocket payment that your household have paid up to today for services delivered in during [child name] hospitalization? (Round all items to the nearest IDR). If there were no payments, please enter "0".
- Please include both payments already made and those that are expected to be made for the services received.

- |   |                  |                                       |
|---|------------------|---------------------------------------|
| 7 | Don't Know       | <b>Skip to instruction before Q23</b> |
| 8 | Refuse to Answer | <b>Skip to instruction before Q23</b> |
- Q19. Can you break down these payments by type of service received during [child name] stay in the hospital?
- |   |                  |                                       |
|---|------------------|---------------------------------------|
| 1 | Yes              |                                       |
| 0 | No               | <b>Skip to instruction before Q23</b> |
| 7 | Don't Know       | <b>Skip to instruction before Q23</b> |
| 8 | Refuse to Answer | <b>Skip to instruction before Q23</b> |

- Q20. How much did your household pay out-of-pocket for consultation, admission and discharge fees?  
If no spending put "0".
- |       |   |                  |
|-------|---|------------------|
| _____ | 7 | Don't Know       |
|       | 8 | Refuse to Answer |
|       | 9 | Not Applicable   |

- Q21. How much did your household pay out-of-pocket for diagnostic tests such as blood tests, dengue test, x-rays or sonogram?  
If no spending put "0".
- |       |   |                  |
|-------|---|------------------|
| _____ | 7 | Don't Know       |
|       | 8 | Refuse to Answer |
|       | 9 | Not Applicable   |

- Q22. How much did your household pay out-of-pocket on all treatment such as medications, intravenous fluid (IVF), medical equipment (I/V sets) or blood bank.  
If no spending put "0"
- |       |   |                  |
|-------|---|------------------|
| _____ | 7 | Don't Know       |
|       | 8 | Refuse to Answer |
|       | 9 | Not Applicable   |



**READ: Now I would like to ask you questions about other spending related to your illness during this interview period from the day you started feeling ill [Response to Q1] until today, such as spending on transportation, meals or lodging. Include also any expenses by any other household member (person you live with), other family members or friend who accompanied you to the hospital for care.**

Q23a. Can you please tell me the type of transportation [child's name] used to go to the hospital?

---

**Note to interviewer: if transportation used was a car, ask about the distance from the patient's house to the hospital. If the patient doesn't know the answer then use google map to determine the distance.**

Q23b. Please report your best estimate of your household out of pocket spending on transportation to the hospital, including ambulance.

If no spending put "0".

*If family or owned vehicle, estimate mileage traveled (two ways travel) and use IDR 16,000 per Km as a proxy for the cost of driving. If family or patient owned Auto-rickshaw/own scooter use IDR 14,000 per Km. If no spending record "0.00".*

-----  
7 Don't Know  
8 Refuse to Answer  
9 Not Applicable

Q23c. Can you please tell me the type of transportation [child's name] used to get back from the hospital?

---

**Note to interviewer: if transportation used was a car, ask about the distance from hospital to patient's house.**

Q23d. Please report your best estimate of your household out of pocket spending on transportation from the hospital, including ambulance.  
 If no spending put "0".  
*If family or owned vehicle, estimate mileage traveled (two ways travel) and use IDR 16,000 per Km as a proxy for the cost of driving. If family or patient owned Auto-rickshaw/own scooter use IDR 14,000 per Km. If no spending record "0.00".*

-----  
 7 Don't Know  
 8 Refuse to Answer  
 9 Not Applicable

Q24. Please report best estimate of your household out-of-pocket spending on food or meals.  
 If no spending put "0"

-----  
 7 Don't Know  
 8 Refuse to Answer  
 9 Not Applicable

Q25. Please report best estimate of your household out-of-pocket spending on lodging in a non-health facility such as a hotel.  
 If no spending put "0"

-----  
 7 Don't Know  
 8 Refuse to Answer  
 9 Not Applicable

**Ambulatory care**

**READ:** These next questions are about any ambulatory health care sought or received since [child name] started feeling ill on [Response to Q1] until today. Please, **include** care from all types of health facilities such as pharmacy, traditional healer, private clinic, Puskesmas primary health center, midwife, hospital outpatient department and/or emergency room, and private lab.

Q26. Did [child name] visit any ambulatory health facility during his/her latest dengue episode? (Show flash card Form 1).

1 Yes  
 0 No **Go to Q40**  
 8 Refuse to Answer **Go to Q40**

**READ:** Think about each time [child name] had contacted with one of those health facilities during the dengue episode that started in [date in Q1]. Then specify the type of care [child name] received at each of the health facilities he/she visited (consultations, diagnostic tests and/or treatment) and try to remember the amounts your household, other family members or friends paid out of pocket in total or for each type of service received.

Q27. How many visits did [child name] had to any of the following health facilities during this interview period? **Show flashcard forms 1 (calendar) and 2 (List of healthcare providers)**

| Visit                   | Number of visits |
|-------------------------|------------------|
| Pharmacy (01)           |                  |
| Traditional healer (02) |                  |
| Private clinic (03)     |                  |

|                                          |  |
|------------------------------------------|--|
| Puskesmas Primary health center (04)     |  |
| Midwife (05)                             |  |
| Outpatient department in a hospital (06) |  |
| Emergency room (07)                      |  |
| Private lab (08)                         |  |
| Satellite health center (09)             |  |
| Other (10)                               |  |
| Specify others_____                      |  |

Q28. Choose from the following the first (*second, third,..*) type of health facility [child name] contracted during this interview period. Can you give the date of each visit? (*Show flashcard form 2 and form 1 (the calendar)*) (Choose one for each visit)

| Visit                                    | First | Second | Third | Fourth | Fifth | Sixth |
|------------------------------------------|-------|--------|-------|--------|-------|-------|
| Date                                     |       |        |       |        |       |       |
| Type of facility                         |       |        |       |        |       |       |
| Pharmacy (01)                            |       |        |       |        |       |       |
| Traditional healer (02)                  |       |        |       |        |       |       |
| Private clinic (03)                      |       |        |       |        |       |       |
| Puskesmas Primary health center (04)     |       |        |       |        |       |       |
| Midwife (05)                             |       |        |       |        |       |       |
| Outpatient department in a hospital (06) |       |        |       |        |       |       |
| Emergency room (07)                      |       |        |       |        |       |       |
| Private lab (08)                         |       |        |       |        |       |       |
| Satellite health center (09)             |       |        |       |        |       |       |
| Other (10), Specify_____                 |       |        |       |        |       |       |
| Don't know (97)                          |       |        |       |        |       |       |
| Refuse to answer (98)                    |       |        |       |        |       |       |

**Read:** What is the name of the facility [child name] went to? (Fill in the space next to type of facility the patient chose)

**Note for interviewer:** A "Public" Facility is a health facility operated by any level of government, and a "social-private" facility is organization run by private non-profit organization, Private is an individual doctor or group of private doctors.

Q29. What type of facility did [child name] visit, during his/her X visit? Was it public or non-public facility? (Choose one per visit)

| Visit  | Public (1) | Social-private (2) | Private (3) | Don't know (7) | Refuse to answer (8) |
|--------|------------|--------------------|-------------|----------------|----------------------|
| First  |            |                    |             |                |                      |
| Second |            |                    |             |                |                      |
| Third  |            |                    |             |                |                      |
| Fourth |            |                    |             |                |                      |
| Fifth  |            |                    |             |                |                      |
| Sixth  |            |                    |             |                |                      |

Q30. What kind of service did [child name] receive in this facility during his/her X visit? (Check all that apply)

| Visit | Consultations | Diagnostic test such as x-ray, blood test | Treatment such as medications, intravenous fluid | Referral | Don't know (7) | Refuse to answer (8) |
|-------|---------------|-------------------------------------------|--------------------------------------------------|----------|----------------|----------------------|
| First |               |                                           |                                                  |          |                |                      |

|        |  |  |  |  |  |  |
|--------|--|--|--|--|--|--|
| Second |  |  |  |  |  |  |
| Third  |  |  |  |  |  |  |
| Fourth |  |  |  |  |  |  |
| Fifth  |  |  |  |  |  |  |
| Sixth  |  |  |  |  |  |  |

**READ:** Now I would like to ask you about the out-of-pocket payments your household, other family members or friend made in this facility.

**Note for interviewer:** Whenever possible, cross check the amount with bills available from the health facility.

Q31. Please report your best estimate of the total out-of-pocket payment for services received in this facility? Please include both payments already made and those that are expected to be made for the services received.  
If there were no payments, please enter "0.00".

| Visit  | Amount, IDR | <b>If zero skip to instruction before Q36a</b> | Don't know (7) | <b>Skip to instruction before Q36a</b> | Refuse of answer (8) | <b>Skip to instruction before Q36a</b> |  |  |
|--------|-------------|------------------------------------------------|----------------|----------------------------------------|----------------------|----------------------------------------|--|--|
| First  |             |                                                |                |                                        |                      |                                        |  |  |
| Second |             |                                                |                |                                        |                      |                                        |  |  |
| Third  |             |                                                |                |                                        |                      |                                        |  |  |
| Fourth |             |                                                |                |                                        |                      |                                        |  |  |
| Fifth  |             |                                                |                |                                        |                      |                                        |  |  |
| Sixth  |             |                                                |                |                                        |                      |                                        |  |  |

Q32. Can you break down the total payments by type of service received?

| Visit  | Yes (1) | No (0) | <b>Skip to instruction before Q36a</b> | Refuse to answer (8) | <b>Skip to instruction before Q36a</b> | Not applicable (9) | <b>Skip to instruction before Q36a</b> |  |  |
|--------|---------|--------|----------------------------------------|----------------------|----------------------------------------|--------------------|----------------------------------------|--|--|
| First  |         |        |                                        |                      |                                        |                    |                                        |  |  |
| Second |         |        |                                        |                      |                                        |                    |                                        |  |  |
| Third  |         |        |                                        |                      |                                        |                    |                                        |  |  |
| Fourth |         |        |                                        |                      |                                        |                    |                                        |  |  |
| Fifth  |         |        |                                        |                      |                                        |                    |                                        |  |  |
| Sixth  |         |        |                                        |                      |                                        |                    |                                        |  |  |

Q33. Out-of-pocket payment on: Consultation. (If no payment record "0.00")

| Visit  | Amount, IDR | Don't know (7) | Refuse to answer (8) | Not applicable (9) |
|--------|-------------|----------------|----------------------|--------------------|
| First  |             |                |                      |                    |
| Second |             |                |                      |                    |
| Third  |             |                |                      |                    |
| Fourth |             |                |                      |                    |
| Fifth  |             |                |                      |                    |
| Sixth  |             |                |                      |                    |

Q34. Out-of-pocket payment on: diagnostic tests or blood bank such as blood test, dengue test, x-rays, sonogram...  
If no payment record "0.00".

| Visit  | Amount, IDR | Don't know (7) | Refuse to answer (8) | Not applicable (9) |
|--------|-------------|----------------|----------------------|--------------------|
| First  |             |                |                      |                    |
| Second |             |                |                      |                    |
| Third  |             |                |                      |                    |
| Fourth |             |                |                      |                    |
| Fifth  |             |                |                      |                    |

|       |  |  |  |  |
|-------|--|--|--|--|
| Sixth |  |  |  |  |
|-------|--|--|--|--|

Q35. Out-of-pocket payment on: treatment such as medications, medical equipment (intravenous sets).

*If no payment record "0.00".*

| Visit  | Amount, IDR | Don't know (7) | Refuse to answer (8) | Not applicable (9) |
|--------|-------------|----------------|----------------------|--------------------|
| First  |             |                |                      |                    |
| Second |             |                |                      |                    |
| Third  |             |                |                      |                    |
| Fourth |             |                |                      |                    |
| Fifth  |             |                |                      |                    |
| Sixth  |             |                |                      |                    |

**READ:** Now I would like to ask you questions about other spending your household, other family members or friend, made specific for this facility during this illness episode such as spending on transportation, meals and lodging. Include also any expenses by any other household member who accompanied you to this first (*second, third, ...*) facility for care.

Q36a. Can you please tell me the type of transportation [child's name] used to go to the [TYPE of health facility]?

**Note to interviewer:** *if transportation used was a car, ask about the distance from the patient's house to the [health facility].*

| Visit  | Transportation type | Distance, KM |
|--------|---------------------|--------------|
| First  |                     |              |
| Second |                     |              |
| Third  |                     |              |
| Fourth |                     |              |
| Fifth  |                     |              |
| Sixth  |                     |              |

Q36b. Please report the best estimate of out-of-pocket spending on transportation to the [Type of health facility]

*If family or owned vehicle, estimate mileage traveled (two ways travel) and use IDR 16,000 per Km as a proxy for the cost of driving. If family or patient owned Auto-rickshaw/own scooter use IDR 14,000 per Km. If no spending record "0.00".*

| Visit  | Amount, IDR | Don't know (7) | Refuse to answer (8) | Not applicable (9) |
|--------|-------------|----------------|----------------------|--------------------|
| First  |             |                |                      |                    |
| Second |             |                |                      |                    |
| Third  |             |                |                      |                    |
| Fourth |             |                |                      |                    |
| Fifth  |             |                |                      |                    |
| Sixth  |             |                |                      |                    |

Q36c. Can you please tell me the type of transportation [child's name] used to get back home from the [TYPE of health facility]?

**Note to interviewer:** *if transportation used was a car, ask about the distance from [health facility] to patient's house.*

| Visit  | Transportation type | Distance, KM |
|--------|---------------------|--------------|
| First  |                     |              |
| Second |                     |              |
| Third  |                     |              |
| Fourth |                     |              |
| Fifth  |                     |              |

|       |  |  |
|-------|--|--|
| Sixth |  |  |
|-------|--|--|

Q36d. Please report the best estimate of out-of-pocket spending on transportation from the [Type health facility].

*If family or owned vehicle, estimate mileage traveled (two ways travel) and use IDR 16,000 per Km as a proxy for the cost of driving. If family or patient owned Auto-rickshaw/own scooter use IDR 14,000 per Km. If no spending record "0.00".*

| Visit  | Amount, IDR | Don't know (7) | Refuse to answer (8) | Not applicable (9) |
|--------|-------------|----------------|----------------------|--------------------|
| First  |             |                |                      |                    |
| Second |             |                |                      |                    |
| Third  |             |                |                      |                    |
| Fourth |             |                |                      |                    |
| Fifth  |             |                |                      |                    |
| Sixth  |             |                |                      |                    |

Q37. Please report the best estimate of out-of-pocket spending on food or meals.

*If not spending report "0.00"*

| Visit  | Amount, IDR | Don't know (7) | Refuse to answer (8) | Not applicable (9) |
|--------|-------------|----------------|----------------------|--------------------|
| First  |             |                |                      |                    |
| Second |             |                |                      |                    |
| Third  |             |                |                      |                    |
| Fourth |             |                |                      |                    |
| Fifth  |             |                |                      |                    |
| Sixth  |             |                |                      |                    |

Q38. Please report the best estimate of out-of-pocket spending on lodging in a non-health facility such as a hotel.

*If not spending report "0.00"*

| Visit  | Amount, IDR | Don't know (7) | Refuse to answer (8) | Not applicable (9) |
|--------|-------------|----------------|----------------------|--------------------|
| First  |             |                |                      |                    |
| Second |             |                |                      |                    |
| Third  |             |                |                      |                    |
| Fourth |             |                |                      |                    |
| Fifth  |             |                |                      |                    |
| Sixth  |             |                |                      |                    |

Q39. Any other health facilities visited during this illness period from the day you stated feeling ill [Response to Q1] until today?

1 Yes **Repeat the process starting with Q28 through Q39**  
 0 No

**Illness impact on household members, other family members who reside outside your household or friends during this illness episode**

**READ:** I would like to learn about how [Child's name]'s illness affected you and each of the members of your household, other family members who reside outside your household or friends. Household members are people who live with [Child's name]. A household member was affected if he or she spent more time or money than usual caring for the child or lost work, income, or school due to his/her illness.

**READ:** Let us talk about [Child's name] first.

**The Child**

- Q40. What is the sex of [Child's name]?  
1 Male  
2 Female
- Q41. How old (in years) was your child at his/her last birthday?  
999 Don't Know  
998 Refuse to answer
- Q41a. What is [Child's name] date of birth (day/month and year)?  
\_\_\_\_/\_\_\_\_/\_\_\_\_ dd/mm/yyyy  
01/01/2097 Don't Know  
01/01/2098 Refuse to Answer
- Q42. What is the highest level of education you have completed? (Choose one)  
*Show Flashcard-Form 3*
- 01 Illiterate  
02 Just literate but no schooling  
03 Attended school for at least one year  
04 Pre-school  
05 Primary school  
06 Middle school  
07 High school  
08 Diploma  
09 Graduate  
10 Post graduate (Masters, PhD)  
11 Professional degree  
97 Don't know  
98 Refuse to answer  
99 Not applicable
- Q43. Is [Child's name] currently studying?  
1 Yes  
0 No **Skip to Q46**  
8 Refused to answer **Skip to Q46**
- Q44. Has [Child's name] lost any days of school due to his/her illness?  
1 Yes  
0 No **Skip to Q46**  
8 Refused to answer **Skip to Q46**
- Q45. How many days of school did [Child's name] miss due to his/her illness?  
Put "0" if none  
\_\_\_\_\_  
97 Don't know  
98 Refuse to answer  
99 Not applicable
- Q46. Is [Child's name] working for pay?  
1 Yes  
0 No **Skip to Q52**  
8 Refused to answer **Skip to Q52**

Q47. Have [Child's name] lost any days of work or income due to his/her illness?  
*If the patient did not lose any days of work please confirm that he/she did not lose any income.*

|   |                   |                    |
|---|-------------------|--------------------|
| 1 | Yes               |                    |
| 0 | No                | <b>Skip to Q52</b> |
| 7 | Don't know        | <b>Skip to Q52</b> |
| 8 | Refused to answer | <b>Skip to Q52</b> |

Q48. How many days of work did [Child's name] lose due to his/her illness?  
 Put "0" if none

|       |                  |
|-------|------------------|
| _____ | Don't know       |
| 97    | Refuse to answer |
| 98    | Not applicable   |
| 99    |                  |

Q49. What was the amount of income lost? (Please give your best estimate)

|       |                   |
|-------|-------------------|
| _____ | Don't know        |
| 7     | Refused to answer |
| 8     | Not applicable    |
| 9     |                   |

Q50. Did [Child's name] receive any paid sick leave for work days off, in which his/her employer or some agency paid his/her salary while he/she was ill?

|   |                   |                    |
|---|-------------------|--------------------|
| 1 | Yes               |                    |
| 0 | No                | <b>Skip to Q52</b> |
| 7 | Don't know        | <b>Skip to Q52</b> |
| 8 | Refused to answer | <b>Skip to Q52</b> |
| 9 | Not applicable    | <b>Skip to Q52</b> |

Q51. How many paid sick days did [Child's name] receive for this illness?  
 Put "0" if none

|       |                  |
|-------|------------------|
| _____ | Don't know       |
| 97    | Refuse to answer |
| 98    | Not applicable   |
| 99    |                  |

Q52. Did you receive any monetary or non- monetary assistance from family members or the community for this illness episode?

|   |                   |                    |
|---|-------------------|--------------------|
| 1 | Yes               |                    |
| 0 | No                | <b>Skip to Q55</b> |
| 8 | Refused to answer | <b>Skip to Q55</b> |

Q53. What is your best estimate of the value of the non- monetary assistance?  
*True 0 if no non-financial assistance.*  
 Put "0" if none

|       |                  |
|-------|------------------|
| _____ | Don't know       |
| 97    | Refuse to answer |
| 98    | Not applicable   |
| 99    |                  |

**Note to interviewer: If don't know, write the type of non-monetary assistance received by patient and patient's family**

---



---



Q54. What is the total amount in IDR of the monetary assistance?

Put "0" if none

|       |                  |
|-------|------------------|
| _____ |                  |
| 97    | Don't know       |
| 98    | Refuse to answer |
| 99    | Not applicable   |

**Number of household members**

Q55. How many members live in [Child's name]'s household? (other than you and [Child's name])?

|       |                  |
|-------|------------------|
| _____ |                  |
| 98    | Refuse to answer |

Q56. How many of these household members have been affected by [Child's name]'s illness directly during this illness episode?

**READ:** A household member is affected if he or she spent more time or money than usual caring for the child or lost work, income, or school due to his/her illness.

|       |                  |
|-------|------------------|
| _____ |                  |
| 00    | Zero             |
| 98    | Refuse to answer |

**READ:** Now I would like to ask you some questions about you and this/these [Response to Q63] member/s of [Child's name]'s HOUSEHOLD who have been affected by his/her illness.

**Care-givers**

**READ:** first I would like to get some information about you.

Q57. What was your age at your last birthday?

|       |                  |
|-------|------------------|
| _____ |                  |
| 998   | Refuse to answer |

Q58. *What is the sex of the proxy? (It is not necessary to ask this question aloud)*

|   |        |
|---|--------|
| 0 | Male   |
| 1 | Female |

Q59. What is the highest level of education you have completed? (Choose one)

*Show Flashcard-Form 3*

|    |                                       |
|----|---------------------------------------|
| 01 | Illiterate                            |
| 02 | Just literate but no schooling        |
| 03 | Attended school for at least one year |
| 04 | Pre-school                            |
| 05 | Primary school                        |
| 06 | Middle school                         |
| 07 | High school                           |
| 08 | Diploma                               |
| 09 | Graduate                              |
| 10 | Post graduate (Masters, PhD)          |
| 11 | Professional degree                   |
| 97 | Don't know                            |
| 98 | Refuse to answer                      |
| 99 | Not applicable                        |

- Q60. Are you attending school and studying now?
- |   |                  |                    |
|---|------------------|--------------------|
| 1 | Yes              |                    |
| 0 | No               | <b>Skip to Q63</b> |
| 8 | Refuse to answer | <b>Skip to Q63</b> |
- Q61. Have you lost any days of school due to [Child's name]'s illness?
- |   |                  |                    |
|---|------------------|--------------------|
| 1 | Yes              |                    |
| 0 | No               | <b>Skip to Q63</b> |
| 8 | Refuse to answer | <b>Skip to Q63</b> |
- Q62. How many days of school did you miss due to [Child's name]'s illness?  
Put "0" if none
- |       |                  |  |
|-------|------------------|--|
| _____ |                  |  |
| 97    | Don't know       |  |
| 98    | Refuse to answer |  |
- Q63. Are you working for pay?
- |   |                  |                    |
|---|------------------|--------------------|
| 1 | Yes              |                    |
| 0 | No               | <b>Skip to Q69</b> |
| 8 | Refuse to answer | <b>Skip to Q69</b> |
- Q64. Did you lose any days of work due to [Child's name]'s illness?
- |   |                  |                     |
|---|------------------|---------------------|
| 1 | Yes              |                     |
| 0 | No               | <b>Skip to Q68a</b> |
| 8 | Refuse to answer | <b>Skip to Q68a</b> |
- Q65. How many days of work did you lose due to [Child's name]'s illness?
- |       |                  |  |
|-------|------------------|--|
| _____ |                  |  |
| 97    | Don't know       |  |
| 98    | Refuse to answer |  |
| 99    | Not Applicable   |  |
- Q66. Did you receive any paid sick leave for work days off, in which your employer or some agency paid your salary while taking care of [Child's name] during his/her illness/?
- |   |                   |                     |
|---|-------------------|---------------------|
| 1 | Yes               |                     |
| 0 | No                | <b>Skip to Q68a</b> |
| 7 | Don't know        | <b>Skip to Q68a</b> |
| 8 | Refused to answer | <b>Skip to Q68a</b> |
| 9 | Not applicable    | <b>Skip to Q68a</b> |
- Q67. How many paid sick days did you receive for this illness?  
Put "0" if none
- |       |                  |  |
|-------|------------------|--|
| _____ |                  |  |
| 97    | Don't know       |  |
| 98    | Refuse to answer |  |
| 99    | Not applicable   |  |
- Q68a. Did you lose any income due to [Child's name]'s illness?
- |   |                  |                    |
|---|------------------|--------------------|
| 1 | Yes              |                    |
| 0 | No               | <b>Skip to Q69</b> |
| 8 | Refuse to answer | <b>Skip to Q69</b> |
- Q68b. What was the amount of income you lost? (Please give your best estimate)
- \_\_\_\_\_

- 7 Don't know
- 8 Refused to answer
- 9 Not applicable

Q69. Of the number of sick days during this interview period, what was the total number of days of additional care that you provided to [Child's name]?

- |    |                  |                    |
|----|------------------|--------------------|
|    |                  |                    |
| 00 | Zero             | <b>Skip to Q71</b> |
| 97 | Don't know       | <b>Skip to Q71</b> |
| 98 | Refuse to answer | <b>Skip to Q71</b> |
| 99 | Not applicable   | <b>Skip to Q71</b> |

**READ:** In the questions below, think about the daily number of additional hours of care that [Child's name] have received from you during his/her illness. Additional hours refer to any number of hours above those that you usually spend with [Child's name]. In estimating the time, please include time spent at home, at the health facility and during transportation to and from the health facility

Q70. During these [Response to Q69] days, on average what was the total daily number of additional hours you spent caring for [Child's name]?  
If none, enter "0"

- |    |                  |
|----|------------------|
|    |                  |
| 97 | Don't know       |
| 98 | Refuse to answer |
| 99 | Not applicable   |

Q71. Did you have additional spending because of [Child's name]'s illness such as transportation, meals and lodging other than the expenses previously mentioned for visiting health providers

- |   |                  |                                       |
|---|------------------|---------------------------------------|
| 1 | Yes              |                                       |
| 0 | No               | <b>Skip to instruction before Q73</b> |
| 7 | Don't know       | <b>Skip to instruction before Q73</b> |
| 8 | Refuse to answer | <b>Skip to instruction before Q73</b> |

Q72. For this question please report the best estimate of the total amount of additional spending over these [Response to Q69] days not already included in one of the previous questions  
If no payment record "0.00"

- |     |                  |
|-----|------------------|
| IDR |                  |
| 7   | Don't know       |
| 8   | Refuse to answer |

**If Q56 is equal to 1 then end interview**

**Read:** Think about the second (third, fourth...) household member who has been affected by [Child's name]'s illness during this interview period

Q73. What is the relationship of this (second, third,..) affected household member to [Child's name]? (Choose one)  
Show flashcard form 4

| Relationship | Household member |              |               |              |              |                |               |
|--------------|------------------|--------------|---------------|--------------|--------------|----------------|---------------|
|              | Second member    | Third member | Fourth member | Fifth member | Sixth member | Seventh member | Eighth member |
| Mother (01)  |                  |              |               |              |              |                |               |
| Father (02)  |                  |              |               |              |              |                |               |
| Husband (03) |                  |              |               |              |              |                |               |

|                          |  |  |  |  |  |  |  |
|--------------------------|--|--|--|--|--|--|--|
| Wife (04)                |  |  |  |  |  |  |  |
| Housemate (05)           |  |  |  |  |  |  |  |
| Sister (06)              |  |  |  |  |  |  |  |
| Brother (07)             |  |  |  |  |  |  |  |
| Son (08)                 |  |  |  |  |  |  |  |
| Daughter (09)            |  |  |  |  |  |  |  |
| Grandmother (10)         |  |  |  |  |  |  |  |
| Grandfather (11)         |  |  |  |  |  |  |  |
| Uncle (12)               |  |  |  |  |  |  |  |
| Aunt (13)                |  |  |  |  |  |  |  |
| House help (14)          |  |  |  |  |  |  |  |
| Baby sitter (15)         |  |  |  |  |  |  |  |
| Other (16) Specify _____ |  |  |  |  |  |  |  |
| Refuse to answer (98)    |  |  |  |  |  |  |  |

Q74. What is [Household member]'s age?

| Household member | Age in years | Don't know (997) | Refuse to answer (998) |
|------------------|--------------|------------------|------------------------|
| Second member    |              |                  |                        |
| Third member     |              |                  |                        |
| Fourth member    |              |                  |                        |
| Fifth member     |              |                  |                        |
| Sixth member     |              |                  |                        |
| Seventh member   |              |                  |                        |
| Eighth member    |              |                  |                        |

Q75. What was the highest level of education that [household member] completed? (Choose one)

*Show flashcard-form 3*

| Relationship                               | Household member |              |               |              |                |               |
|--------------------------------------------|------------------|--------------|---------------|--------------|----------------|---------------|
|                                            | Second member    | Third member | Fourth member | Fifth member | Seventh member | Eighth member |
| Illiterate (01)                            |                  |              |               |              |                |               |
| Just literal but no schooling (02)         |                  |              |               |              |                |               |
| Attended school for at least one year (03) |                  |              |               |              |                |               |
| Pre-school (04)                            |                  |              |               |              |                |               |
| Primary school (05)                        |                  |              |               |              |                |               |
| Middle school (06)                         |                  |              |               |              |                |               |
| High school (07)                           |                  |              |               |              |                |               |
| Diploma (08)                               |                  |              |               |              |                |               |
| Graduate (09)                              |                  |              |               |              |                |               |
| Post graduate (Masters, PhD) (10)          |                  |              |               |              |                |               |
| Professional degree (11)                   |                  |              |               |              |                |               |
| Don't know (97)                            |                  |              |               |              |                |               |
| Refuse to answer (98)                      |                  |              |               |              |                |               |
| Not applicable (99)                        |                  |              |               |              |                |               |

Q76. Is [Household member] currently studying?

| Household member | Yes (Code:1) | No (Code:2) | <b>Skip to Q79</b> | Don't know (Code:7) | <b>Skip to Q79</b> | Refuse to answer (Code:8) | <b>Skip to Q79</b> |
|------------------|--------------|-------------|--------------------|---------------------|--------------------|---------------------------|--------------------|
| Second member    |              |             |                    |                     |                    |                           |                    |

|                |  |  |  |  |  |  |
|----------------|--|--|--|--|--|--|
| Third member   |  |  |  |  |  |  |
| Fourth member  |  |  |  |  |  |  |
| Fifth member   |  |  |  |  |  |  |
| Sixth member   |  |  |  |  |  |  |
| Seventh member |  |  |  |  |  |  |
| Eighth member  |  |  |  |  |  |  |

Q77. Has [Household member] lost any days of school due to [Child's name]'s illness?

| Household member | Yes (Code:1) | No (Code:2) | <b>Skip to Q79</b> | Don't know (Code:7) | <b>Skip to Q79</b> | Refuse to answer (Code:8) | <b>Skip to Q79</b> |
|------------------|--------------|-------------|--------------------|---------------------|--------------------|---------------------------|--------------------|
| Second member    |              |             |                    |                     |                    |                           |                    |
| Third member     |              |             |                    |                     |                    |                           |                    |
| Fourth member    |              |             |                    |                     |                    |                           |                    |
| Fifth member     |              |             |                    |                     |                    |                           |                    |
| Sixth member     |              |             |                    |                     |                    |                           |                    |
| Seventh member   |              |             |                    |                     |                    |                           |                    |
| Eighth member    |              |             |                    |                     |                    |                           |                    |

Q78. How many days of school did [household member] missed due to [Child's name]'s illness?  
Record "0" if none

| Household member | Days of schooling lost | Don't know (97) | Refuse to answer (98) |
|------------------|------------------------|-----------------|-----------------------|
| Second member    |                        |                 |                       |
| Third member     |                        |                 |                       |
| Fourth member    |                        |                 |                       |
| Fifth member     |                        |                 |                       |
| Sixth member     |                        |                 |                       |
| Seventh member   |                        |                 |                       |
| Eighth member    |                        |                 |                       |

Q79. Is [Household member] working for pay?

| Household member | Yes (Code:1) | No (Code:0) | <b>Skip to Q84a</b> | Don't know (Code:7) | <b>Skip to Q84a</b> | Refuse to answer (Code:8) | <b>Skip to Q84a</b> |
|------------------|--------------|-------------|---------------------|---------------------|---------------------|---------------------------|---------------------|
| Second member    |              |             |                     |                     |                     |                           |                     |
| Third member     |              |             |                     |                     |                     |                           |                     |
| Fourth member    |              |             |                     |                     |                     |                           |                     |
| Fifth member     |              |             |                     |                     |                     |                           |                     |
| Sixth member     |              |             |                     |                     |                     |                           |                     |
| Seventh member   |              |             |                     |                     |                     |                           |                     |
| Eighth member    |              |             |                     |                     |                     |                           |                     |

Q80. Has [Household member] lost any days of work due to [Child's name] illness?

| Household member | Yes (Code:1) | No (Code:0) | <b>Skip to Q84a</b> | Don't know (Code:7) | <b>Skip to Q84a</b> | Refuse to answer (Code:8) | <b>Skip to Q84a</b> |
|------------------|--------------|-------------|---------------------|---------------------|---------------------|---------------------------|---------------------|
| Second member    |              |             |                     |                     |                     |                           |                     |
| Third member     |              |             |                     |                     |                     |                           |                     |
| Fourth member    |              |             |                     |                     |                     |                           |                     |
| Fifth member     |              |             |                     |                     |                     |                           |                     |
| Sixth member     |              |             |                     |                     |                     |                           |                     |
| Seventh member   |              |             |                     |                     |                     |                           |                     |

|               |  |  |  |  |  |  |
|---------------|--|--|--|--|--|--|
| Eighth member |  |  |  |  |  |  |
|---------------|--|--|--|--|--|--|

Q81. How many days of work did [Household member] lose due to [Child's name] illness?

Record "0" if none

| Household member | Number of days | Don't know (Code:97) | Refuse to answer (Code:98) | Not applicable (Code:99) |
|------------------|----------------|----------------------|----------------------------|--------------------------|
| Second member    |                |                      |                            |                          |
| Third member     |                |                      |                            |                          |
| Fourth member    |                |                      |                            |                          |
| Fifth member     |                |                      |                            |                          |
| Sixth member     |                |                      |                            |                          |
| Seventh member   |                |                      |                            |                          |
| Eighth member    |                |                      |                            |                          |

Q82. Did [household member] receive any paid sick leave for work days off, in which the employer or some agency paid his/her salary for caring for [Child's name] while you were ill?

| Household member | Yes (Code: 1) | If Zero skip to Q84a | Don't know (Code:7) | Skip to Q84a | Refused to answer (Code:8) | Skip to Q84a | Not Applicable (Code:9) | Skip to Q84a |
|------------------|---------------|----------------------|---------------------|--------------|----------------------------|--------------|-------------------------|--------------|
| Second member    |               |                      |                     |              |                            |              |                         |              |
| Third member     |               |                      |                     |              |                            |              |                         |              |
| Fourth member    |               |                      |                     |              |                            |              |                         |              |
| Fifth member     |               |                      |                     |              |                            |              |                         |              |
| Sixth member     |               |                      |                     |              |                            |              |                         |              |
| Seventh member   |               |                      |                     |              |                            |              |                         |              |
| Eighth member    |               |                      |                     |              |                            |              |                         |              |
| Ninth member     |               |                      |                     |              |                            |              |                         |              |

Q83. How many paid sick days did [household member] receive?

| Household member | Number of paid sick days | Don't know (97) | Refuse to answer (98) |
|------------------|--------------------------|-----------------|-----------------------|
| Second member    |                          |                 |                       |
| Third member     |                          |                 |                       |
| Fourth member    |                          |                 |                       |
| Fifth member     |                          |                 |                       |
| Sixth member     |                          |                 |                       |
| Seventh member   |                          |                 |                       |
| Eighth member    |                          |                 |                       |

Q84a. Has [Household member] lost any income due to [Child's name] illness?

| Household member | Yes (Code:1) | No (Code: 0) | Skip to Q85 | Don't know (Code:7) | Skip to Q85 | Refuse to answer (Code:8) | Skip to Q85 |
|------------------|--------------|--------------|-------------|---------------------|-------------|---------------------------|-------------|
| Second member    |              |              |             |                     |             |                           |             |
| Third member     |              |              |             |                     |             |                           |             |
| Fourth member    |              |              |             |                     |             |                           |             |
| Fifth member     |              |              |             |                     |             |                           |             |
| Sixth member     |              |              |             |                     |             |                           |             |
| Seventh member   |              |              |             |                     |             |                           |             |
| Eighth member    |              |              |             |                     |             |                           |             |

Q84b. What was the amount of income [household member] lost? (Please give your best estimate).

*If no payment record "0.00".*

| Household member | Amount, IDR | Don't know (7) | Refuse to answer (8) | Not applicable (9) |
|------------------|-------------|----------------|----------------------|--------------------|
| Second member    |             |                |                      |                    |
| Third member     |             |                |                      |                    |
| Fourth member    |             |                |                      |                    |
| Fifth member     |             |                |                      |                    |
| Sixth member     |             |                |                      |                    |
| Seventh member   |             |                |                      |                    |
| Eighth member    |             |                |                      |                    |
| Ninth member     |             |                |                      |                    |

Q85. Of the number of sick days during this illness episode that started on [date of illness till patient date of recovery or date of interview], what was the total number of days of additional care that [household member] provided [Child's name]?

| Household member | Number of days | <i>If Zero skip to Q87</i> | Don't know (Code:97) | <i>Skip to Q87</i> | Refused to answer (Code:98) | <i>Skip to Q87</i> | Not Applicable (Code:99) | <i>Skip to Q87</i> |
|------------------|----------------|----------------------------|----------------------|--------------------|-----------------------------|--------------------|--------------------------|--------------------|
| Second member    |                |                            |                      |                    |                             |                    |                          |                    |
| Third member     |                |                            |                      |                    |                             |                    |                          |                    |
| Fourth member    |                |                            |                      |                    |                             |                    |                          |                    |
| Fifth member     |                |                            |                      |                    |                             |                    |                          |                    |
| Sixth member     |                |                            |                      |                    |                             |                    |                          |                    |
| Seventh member   |                |                            |                      |                    |                             |                    |                          |                    |
| Eighth member    |                |                            |                      |                    |                             |                    |                          |                    |

**READ:** In the questions below, think about the daily number of additional hours of care that [Child's name] has received from [household member x] during his/her illness. Additional hours refer to any number of hours above those that [household member x] usually spends with [Child's name]. In estimating the time, please include time spent at home, at the health facility and during transportation to and from the health facility

Q86. During these [Response to Q90] days, on average what was the total daily number of additional hours [household member x] spent caring for [Child's name]?

*If none, enter "0"*

| Household member | Average additional hours of daily care | Don't know (Code: 97) | Refuse to answer (Code: 98) | Not applicable (Code: 99) |
|------------------|----------------------------------------|-----------------------|-----------------------------|---------------------------|
| Second member    |                                        |                       |                             |                           |
| Third member     |                                        |                       |                             |                           |
| Fourth member    |                                        |                       |                             |                           |
| Fifth member     |                                        |                       |                             |                           |
| Sixth member     |                                        |                       |                             |                           |
| Seventh member   |                                        |                       |                             |                           |
| Eighth member    |                                        |                       |                             |                           |

Q87. Did [household member x] have additional spending because of [Child's name]'s illness such as transportation, meals and lodging other than the expenses previously mentioned for visiting health providers?

| Household member | Yes (Code:1) | No (Code: 0) | <i>Skip to next household member</i> | Don't know (Code:7) | <i>Skip to next household member</i> | Refused to answer (Code:8) | <i>Skip to next household member</i> | Not Applicable (Code:9) | <i>Skip to next household member</i> |
|------------------|--------------|--------------|--------------------------------------|---------------------|--------------------------------------|----------------------------|--------------------------------------|-------------------------|--------------------------------------|
|                  |              |              |                                      |                     |                                      |                            |                                      |                         |                                      |

|                |  |  |  |  |  |  |  |  |
|----------------|--|--|--|--|--|--|--|--|
| Second member  |  |  |  |  |  |  |  |  |
| Third member   |  |  |  |  |  |  |  |  |
| Fourth member  |  |  |  |  |  |  |  |  |
| Fifth member   |  |  |  |  |  |  |  |  |
| Sixth member   |  |  |  |  |  |  |  |  |
| Seventh member |  |  |  |  |  |  |  |  |
| Eighth member  |  |  |  |  |  |  |  |  |

Q88. For this question please report the best estimate of the total amount of additional spending over these [Response to Q85] days not already included in one of the previous questions  
*If no payment record "0.00"*

| Household member | Amount, IDR | Don't know (7) | Refuse to answer (8) | Not applicable (9) |
|------------------|-------------|----------------|----------------------|--------------------|
| Second member    |             |                |                      |                    |
| Third member     |             |                |                      |                    |
| Fourth member    |             |                |                      |                    |
| Fifth member     |             |                |                      |                    |
| Sixth member     |             |                |                      |                    |
| Seventh member   |             |                |                      |                    |
| Eighth member    |             |                |                      |                    |

*Check 56, if the answer is more than 1 then do repeat Qs 73 through 88 for all the household members listed. If Q56 is equal to 2, then read the sentence below and end interview*

**READ:** Thank you so much for your participation! If you have any questions regarding this interview or the results of this study please contact xxx at [Name of institute] from xx at xxx



## **Supplementary Information**

### **Cost of dengue illness in Indonesia across hospital, ambulatory and non-medical settings**

S4: Questionnaire S4. Pediatric questionnaire (patients under age 18) in Bahasa Indonesia

Kuesioner untuk Pasien Dengue Anak Terkonfirmasi (Usia ≤ 17)

Nama Pasien \_\_\_\_\_  
Nomor Sampel \_\_\_\_\_  
Nama orang tua/yang diwawancara \_\_\_\_\_  
Tanggal Wawancara \_\_\_\_\_

**Wawancara**

Q0. Nama fasilitas kesehatan tempat pasien dirawat. (Pilih salah satu)

- 1 Rumah sakit \_\_\_\_\_  
2 Puskesmas \_\_\_\_\_

Q00. Yang diwawancara

- 1 Pasien  
2 Wali pasien

**BACAAN:** Sekarang kita akan berbicara mengenai periode penyakit [Nama anak]. Dan saya akan menunjukkan kalender yang akan membantu Anda menjawab pertanyaan berikut.

Tunjukkan kalender (form 1) ke wali dan lanjutkan hingga Q39. Tuliskan "hari ini" pada kotak untuk tanggal hari ini.

Q1. Kapan [Nama anak] mulai sakit?

Tuliskan "mulai demam" pada tanggal di kalender.

- \_\_/\_\_/\_\_\_\_ dd/mm/yyyy  
01/01/2097 Tidak tahu  
01/01/2098 Menolak menjawab

Q2. Apakah [Nama anak] saat mengalami demam? [Respon terhadap Q1]

- 1 Ya  
0 Tidak **Lanjut ke Q6**  
8 Menolak menjawab **Lanjut ke Q6**

Q.3 Kapan [nama anak] mulai demam?

Tuliskan "mulai demam" pada tanggal di kalender

- \_\_/\_\_/\_\_\_\_ dd/mm/yyyy  
01/01/2097 Tidak tahu  
01/01/2098 Menolak menjawab

Q.4 Apakah demam [Nama anak] saat ini telah berakhir?

- 1 Ya  
0 No **Lanjut ke Q6**  
8 Menolak menjawab **Lanjut ke Q6**

Q.5 Kapan demam [nama anak] berakhir?

Tuliskan "demam berakhir" pada tanggal di kalender

- \_\_/\_\_/\_\_\_\_ dd/mm/yyyy  
01/01/2097 Tidak tahu  
01/01/2098 Menolak menjawab

Q6. Gejala apa yang [nama anak] rasakan?

- 1 Nyeri otot  
2 Mual  
3 Sakit kepala  
4 Lainnya

Q6a Gejala lainnya \_\_\_\_\_

\_\_\_\_\_

- Q7. Pada keseluruhan periode sakit, kapan [nama anak] merasa itu terburuk?  
*Tuliskan "hari terburuk" pada tanggal,*
- \_\_/\_\_/\_\_\_\_  
 01/01/2097  
 01/01/2098
- dd/mm/yyyy  
 Tidak tahu  
 Menolak menjawab
- Q8. Pada saat interview ini, apakah [nama anak] masih merasa sakit?
- 1 Ya  
 0 Tidak
- Lanjut ke Q11**
- Q9. Apakah [nama anak] sudah pulih sepenuhnya dari episode sakit ini?
- 1 Ya  
 0 No  
 8 Menolak menjawab
- Lanjut ke Q11**  
**Lanjut ke Q11**
- Q10. Kapan [nama anak] merasa pulih sepenuhnya pada episode sakit ini?  
*Tuliskan "pulihan sepenuhnya" pada tanggal di kalender,*
- \_\_/\_\_/\_\_\_\_  
 01/01/2097  
 01/01/2098
- dd/mm/yyyy  
 Tidak tahu  
 Menolak menjawab
- Q11. Berapa lama sejak [nama anak] merasa sakit hingga memutuskan pergi untuk mendapat layanan kesehatan? (Pilih salah satu)
- 1 Dalam 24 jam  
 2 Antara 24 and 48 jam  
 3 Setelah 48 jam  
 7 Tidak tahu  
 8 Menolak menjawab

**Perawatan yang diterima pasien dari hari merasa sakit hingga saat ini**

*Jika punya form KDRS, Mohon mengisi Q12 dan 13 dari form Rumah Sakit*

- Q12. Apakah rumah sakit tempat [nama anak] dirawat adalah milik pemerintah, swasta-sosial atau swasta?
- |   |                  |
|---|------------------|
| 1 | Milik pemerintah |
| 2 | Swasta - sosial  |
| 3 | Swasta           |
| 7 | Tidak tahu       |
| 8 | Menolak menjawab |
- Q13. Indikasikan tipe rumah sakit tempat [nama anak] yang paling lama menjalani perawatan rawat inap?
- |   |                                               |
|---|-----------------------------------------------|
| 1 | Universitas, rumah sakit rujukan atau tersier |
| 2 | Rumah sakit lain                              |
| 7 | Tidak tahu                                    |
| 8 | Menolak menjawab                              |

**Rawat Inap**

***BACAKAN: Pada pertanyaan selanjutnya saya hendak mencari tahu apakah [nama anak] menghabiskan waktu 1 atau lebih hari di rumah sakit.***

- Q14. Apakah [nama anak] dirawat inap selama episode sakit tersebut?
- |   |                  |                                                    |
|---|------------------|----------------------------------------------------|
| 1 | Ya               |                                                    |
| 0 | Tidak            | <b><i>Lanjut bacakan instruksi sebelum Q26</i></b> |
| 8 | Menolak menjawab | <b><i>Lanjut bacakan instruksi sebelum Q26</i></b> |
- Q14a. Kapan [nama anak] mulai dirawat rumah sakit?  
*Tuliskan "masuk" pada tanggal di kalender*
- |             |                  |
|-------------|------------------|
| ___/___/___ | dd/mm/yy         |
| 01/01/2097  | Tidak tahu       |
| 01/01/2098  | Menolak menjawab |
- Q14b. Selama masa rawat inap, berapa malam [nama anak] menghabiskan waktu di rumah sakit?
- |           |                  |
|-----------|------------------|
| ___ . ___ |                  |
| 98        | Menolak menjawab |
- Q14c. Kapan [nama anak] keluar dari rumah sakit?  
*Tuliskan "keluar" pada tanggal di kalender*
- |             |                  |
|-------------|------------------|
| ___/___/___ | dd/mm/yy         |
| 01/01/2097  | Tidak tahu       |
| 01/01/2098  | Menolak menjawab |

**BACAKAN: Sekarang saya akan menanyakan beberapa pertanyaan terkait durasi rawat inap [nama anak], pengeluaran [nama anak] selama perawatan dan pengeluaran lain terkait rawat inap tersebut.**

Q15. Dapatkah Anda memberi tahu saya kelas bangsal rawatan Anda selama di rumah sakit?

1. VIP
2. Kelas 1
3. Kelas 2
4. Kelas 3

Q16. Selama masa rawat inap, apakah [nama anak] sempat dirawat di intensive care unit (ICU)?

- 1 Ya **Lanjut bacakan instruksi sebelum Q18**  
0 Tidak **Lanjut bacakan instruksi sebelum Q18**  
8 Menolak menjawab **Lanjut bacakan instruksi sebelum Q18**

Q17. Berapa hari [nama anak] dirawat di ICU? (jika pasien dirawat di ICU selama 1 hari atau kurang, tuliskan 1)

\_\_\_\_ . \_\_\_\_  
98 Menolak menjawab

**BACAKAN: Sekarang saya akan menanyakan mengenai pengeluaran mandiri yang [nama anak] bayar ke fasilitas kesehatan. Pengeluaran mandiri adalah jumlah uang yang [nama anak] atau keluarga [nama anak] bayarkan untuk biaya perawatan [nama anak], baik itu [nama anak] menerima penggantian atau tidak dari jumlah tersebut selama episode sakit [nama anak].**

Q18. Berapa estimasi pengeluaran mandiri [nama anak] untuk perawatan yang [nama anak] terima selama rawat inap? (Dapat dibulatkan). Jika tidak ada pengeluaran, masukkan "0".

Mohon dimasukkan baik pengeluaran yang telah dibayarkan dan pengeluaran yang akan terjadi

- \_\_\_\_ - \_\_\_\_ - \_\_\_\_ - \_\_\_\_ - \_\_\_\_  
7 Tidak tahu **Lanjut bacakan instruksi sebelum Q23**  
8 Menolak menjawab **Lanjut bacakan instruksi sebelum Q23**

Q19. Dapatkah [nama anak] memilah milah pengeluaran [nama anak] berdasar jenis layanan yang [nama anak] dapatkan selama rawat inap?

- 1 Ya **Lanjut bacakan instruksi sebelum Q23**  
0 Tidak **Lanjut bacakan instruksi sebelum Q23**  
7 Tidak tahu **Lanjut bacakan instruksi sebelum Q23**  
8 Menolak menjawab **Lanjut bacakan instruksi sebelum Q23**

Q20. Berapa pengeluaran mandiri rumah tangga [nama anak] yang dibayarkan untuk konsultasi, saat mulai hingga selesai rawat inap?

Jika tidak ada pengeluaran, masukkan "0".

- \_\_\_\_ - \_\_\_\_ - \_\_\_\_ - \_\_\_\_ - \_\_\_\_  
7 Tidak tahu  
8 Menolak menjawab  
9 Tidak dapat diaplikasikan

Q21. Berapa pengeluaran mandiri rumah tangga [nama anak] yang dibayarkan untuk uji diagnostik seperti cek darah, tes dengue, rontgent atau sonogram?

Jika tidak ada pengeluaran, masukkan "0".

-----

- 7 Tidak tahu
- 8 Menolak menjawab
- 9 Tidak dapat diaplikasikan

Q22. Berapa pengeluaran mandiri rumah tangga [nama anak] yang dibayarkan untuk pengobatan, cairan infus dan peralatan medis atau bank darah?

Jika tidak ada pengeluaran, masukkan "0".

-----

- 7 Tidak tahu
- 8 Menolak menjawab
- 9 Tidak dapat diaplikasikan

**BACAKAN: Sekarang saya akan menanyakan mengenai pengeluaran [nama anak] terkait episode penyakit dari awal hingga selesai merasa sakit [Merespons Q1], seperti untuk transportasi, makan, atau penginapan. Termasuk pengeluaran lain oleh anggota keluarga yang menemani masa rawat inap [nama anak].**

Q23a. Apa moda transportasi yang [nama anak] gunakan untuk menuju ke rumah sakit? \_\_\_\_\_

**Catatan pewawancara: jika transportasi yang digunakan adalah mobil, tanyakan jarak rumah pasien ke rumah sakit. Jika pasien tidak tahu jawabannya, maka gunakan google map untuk menentukan jaraknya.**

Q23b. Berapa estimasi pengeluaran mandiri keluarga Anda untuk transportasi menuju rumah sakit), termasuk ambulans?

Jika tidak ada pengeluaran, masukkan "0".

*Jika keluarga memiliki mobil, estimasikan jarak tempuh perjalanan (datang dan pergi) dan gunakan proxy Rp. 16.000 per km. Dan jika pasien menggunakan motor gunakan proxy Rp 14.000 per km. Jika tidak ada pengeluaran, catat "0.00".*

-----

- 7 Tidak tahu
- 8 Menolak menjawab
- 9 Tidak dapat diaplikasikan

Q23c. Apa moda transportasi yang [nama anak] gunakan untuk menuju ke rumah sakit? \_\_\_\_\_

Q23d. Berapa estimasi pengeluaran mandiri keluarga Anda untuk transportasi dari rumah sakit), termasuk ambulans?

Jika tidak ada pengeluaran, masukkan "0".

*Jika keluarga memiliki mobil, estimasikan jarak tempuh perjalanan (datang dan pergi) dan gunakan proxy Rp. 16.000 per km. Dan jika pasien menggunakan motor gunakan proxy Rp 14.000 per km. Jika tidak ada pengeluaran, catat "0.00".*

-----

- 7 Tidak tahu
- 8 Menolak menjawab
- 9 Tidak dapat diaplikasikan

Q24. Berapa estimasi pengeluaran mandiri keluarga [nama anak] untuk makan?

Jika tidak ada pengeluaran, masukkan "0".

-----

7 Tidak tahu

8 Menolak menjawab

9 Tidak dapat diaplikasikan

Q25. Berapa estimasi pengeluaran mandiri keluarga [nama anak] untuk penginapan di fasilitas non-kesehatan seperti hotel?

Jika tidak ada pengeluaran, masukkan "0".

-----

7 Tidak tahu

8 Menolak menjawab

9 Tidak dapat diaplikasikan

### Rawat Jalan

**BACAKAN:** Pertanyaan berikut ini akan terkait layanan rawat jalan sejak [nama anak] mulai merasa hingga berakhirnya sakit [Merespons Q1]. Mohon **termasuk** perawatan dari berbagai jenis fasilitas kesehatan seperti apotek, pengobatan tradisional, klinik swasta, puskesmas, bidan, poli rawat jalan dan/atau unit gawat darurat, dan lab swasta

Q26. Apakah [nama anak] mengunjungi fasilitas rawat jalan pada episode dengue [nama anak] yang terakhir? (Tunjukkan form peraga 1).

1 Ya

0 Tidak

8 Menolak menjawab

**Lanjutkan ke Q40**

**Lanjutkan ke Q40**

**BACAKAN:** Pikirkan tentang waktu yang [nama anak] habiskan untuk akses fasilitas kesehatan berikut selama episode sakit dimulai [tanggal pada Q1]. Kemudian spesifikkan jenis perawatan yang [nama anak] terima pada tiap fasilitas kesehatan yang [nama anak] kunjungi (konsultasi, uji diagnostik, dan/atau pengobatan) dan cobalah mengingat kembali jumlah pengeluaran mandiri keluarga [nama anak] pada tiap jenis layanan tersebut.

Q27. Berapa kali kunjungan pada fasilitas kesehatan berikut ini selama periode sakit [nama anak]?

**Tunjukkan form 1 (kalender) dan 2 (daftar fasilitas kesehatan)**

| Visit                             | Number of visits |
|-----------------------------------|------------------|
| Apotek (01)                       |                  |
| Pengobatan tradisional (02)       |                  |
| Dokter praktek pribadi (03)       |                  |
| Puskesmas (04)                    |                  |
| Bidan (05)                        |                  |
| Poli rawat jalan rumah sakit (06) |                  |
| Unit Gawat Darurat (UGD) (07)     |                  |
| Lab swasta (08)                   |                  |
| Puskesmas pembantu (09)           |                  |
| Lainnya (10)                      |                  |
| Sebutkan lainnya _____            |                  |

Q28. Pilihlah dari berikut ini tipe fasilitas kesehatan yang [nama anak] kunjungi selama periode sakit. Apakah [nama anak] dapat memberi tanggal pada tiap kunjungan? (*Tunjukkan form 2 dan form 1, pilih salah satu pada tiap kunjungan*)

| Kunjungan                         | Pertama | Kedua | Ketiga | Keempat | Kelima | Keenam |
|-----------------------------------|---------|-------|--------|---------|--------|--------|
| Tanggal                           |         |       |        |         |        |        |
| Type of facility                  |         |       |        |         |        |        |
| Apotek (01)                       |         |       |        |         |        |        |
| Pengobatan tradisional (02)       |         |       |        |         |        |        |
| Dokter praktek pribadi (03)       |         |       |        |         |        |        |
| Puskesmas (04)                    |         |       |        |         |        |        |
| Bidan (05)                        |         |       |        |         |        |        |
| Poli rawat jalan rumah sakit (06) |         |       |        |         |        |        |
| UGD (07)                          |         |       |        |         |        |        |
| Lab swasta (08)                   |         |       |        |         |        |        |
| Puskesmas pembantu (09)           |         |       |        |         |        |        |
| Lainnya (10),<br>sebutkan _____   |         |       |        |         |        |        |
| Tidak tahu (97)                   |         |       |        |         |        |        |
| Menolak menjawab (98)             |         |       |        |         |        |        |

**BACAKAN:** Sebutkan nama fasilitas kesehatan manakah yang [nama anak] kunjungi? (Isikan kolom di samping tipe fasilitas kesehatan yang dipilih pasien)

**Catatan untuk pewawancara:** Fasilitas kesehatan “public” adalah fasilitas kesehatan yang dioperasikan oleh pemerintah dalam berbagai tingkatan, dan “swasta-sosial” adalah fasilitas kesehatan yang dioperasikan oleh organisasi sosial non-profit, “swasta” adalah dokter praktek pribadi atau klinik bersama.

Q29. Apa tipe fasilitas kesehatan yang [nama anak] kunjungi, selama kunjungan kali ke-X [nama anak]? Apakah fasilitas kesehatan public atau non-public? (Pilih salah satu per kunjungan)

| Kunjungan | Publik (1) | Swasta-sosial (2) | Swasta (3) | Tidak tahu (7) | Menolak menjawab (8) |
|-----------|------------|-------------------|------------|----------------|----------------------|
| Pertama   |            |                   |            |                |                      |
| Kedua     |            |                   |            |                |                      |
| Ketiga    |            |                   |            |                |                      |
| Keempat   |            |                   |            |                |                      |
| Kelima    |            |                   |            |                |                      |
| Keenam    |            |                   |            |                |                      |

Q30. Jenis layanan apa yang [nama anak] terima selama kunjungan kali ke-X [nama anak]? (Cek yang diaplikasikan)

| Kunjungan | Konsultasi | Uji diagnostic seperti rontgent, sampel darah | Pengobatan medis, infus | Rujukan | Tidak tahu (7) | Menolak menjawab (8) |
|-----------|------------|-----------------------------------------------|-------------------------|---------|----------------|----------------------|
| Pertama   |            |                                               |                         |         |                |                      |
| Kedua     |            |                                               |                         |         |                |                      |
| Ketiga    |            |                                               |                         |         |                |                      |
| Keempat   |            |                                               |                         |         |                |                      |
| Kelima    |            |                                               |                         |         |                |                      |
| Keenam    |            |                                               |                         |         |                |                      |

**BACAKAN:** Sekarang saya akan menanyakan mengenai pengeluaran mandiri keluarga [nama anak] terhadap fasilitas berikut ini.

**Catatan pewawancara:** Bila memungkinkan, kroscek dengan jumlah tagihan yang tersedia dari fasilitas kesehatan.



Q31. Mohon sebutkan perkiraan terbaik [nama anak] dari total pengeluaran mandiri terhadap layanan yang [nama anak] terima dari fasilitas kesehatan? Mohon termasuk pengeluaran yang telah dilakukan dan tagihan yang akan datang. Jika tidak ada pengeluaran, mohon masukkan "0,00"

| Kunjungan | Jumlah, IDR | <i>Jika 0 lompat ke instruksi sebelum Q36a</i> | Tidak tahu (7) | <i>Lompat ke instruksi sebelum Q36a</i> | Menolak menjawab (8) | <i>Lompat ke instruksi sebelum Q36a</i> |
|-----------|-------------|------------------------------------------------|----------------|-----------------------------------------|----------------------|-----------------------------------------|
| Pertama   |             |                                                |                |                                         |                      |                                         |
| Kedua     |             |                                                |                |                                         |                      |                                         |
| Ketiga    |             |                                                |                |                                         |                      |                                         |
| Keempat   |             |                                                |                |                                         |                      |                                         |
| Kelima    |             |                                                |                |                                         |                      |                                         |
| Keenam    |             |                                                |                |                                         |                      |                                         |

Q32. Apakah [nama anak] dapat mengurai jumlah pembayaran berdasar tipe layanan yang diterima?

| Kunjungan | Ya (1) | Tidak (0) | <i>Lompat ke instruksi sebelum Q36a</i> | Menolak menjawab (8) | <i>Lompat ke instruksi sebelum Q36a</i> | Tidak dapat diterapkan (9) | <i>Lompat ke instruksi sebelum Q36a</i> |
|-----------|--------|-----------|-----------------------------------------|----------------------|-----------------------------------------|----------------------------|-----------------------------------------|
| Pertama   |        |           |                                         |                      |                                         |                            |                                         |
| Kedua     |        |           |                                         |                      |                                         |                            |                                         |
| Ketiga    |        |           |                                         |                      |                                         |                            |                                         |
| Keempat   |        |           |                                         |                      |                                         |                            |                                         |
| Kelima    |        |           |                                         |                      |                                         |                            |                                         |
| Keenam    |        |           |                                         |                      |                                         |                            |                                         |

Q33. Pengeluaran mandiri pada: konsultasi. (*Jika tidak ada pembayaran tuliskan "0,00"*)

| Visit   | Jumlah, IDR | Tidak tahu (7) | Menolak menjawab (8) | Tidak dapat diterapkan (9) |
|---------|-------------|----------------|----------------------|----------------------------|
| Pertama |             |                |                      |                            |
| Kedua   |             |                |                      |                            |
| Ketiga  |             |                |                      |                            |
| Keempat |             |                |                      |                            |
| Kelima  |             |                |                      |                            |
| Keenam  |             |                |                      |                            |

Q34. Pengeluaran mandiri pada: transfusi darah atau uji diagnostic seperti rontgent, sampel darah, sonogram... (*Jika tidak ada pembayaran tuliskan "0,00"*)

| Kunjungan | Jumlah, IDR | Tidak tahu (7) | Menolak menjawab (8) | Tidak dapat diterapkan (9) |
|-----------|-------------|----------------|----------------------|----------------------------|
| Pertama   |             |                |                      |                            |
| Kedua     |             |                |                      |                            |
| Ketiga    |             |                |                      |                            |
| Keempat   |             |                |                      |                            |
| Kelima    |             |                |                      |                            |
| Keenam    |             |                |                      |                            |

Q35. Pengeluaran mandiri pada: pengobatan, set peralatan medis.  
(Jika tidak ada pembayaran tuliskan "0,00")

| Kunjungan | Jumlah, IDR | Tidak tahu (7) | Menolak menjawab (8) | Tidak dapat diterapkan (9) |
|-----------|-------------|----------------|----------------------|----------------------------|
| Pertama   |             |                |                      |                            |
| Kedua     |             |                |                      |                            |
| Ketiga    |             |                |                      |                            |
| Keempat   |             |                |                      |                            |
| Kelima    |             |                |                      |                            |
| Keenam    |             |                |                      |                            |

**BACAKAN:** Sekarang saya akan menanyakan terkait pengeluaran keluarga [nama anak] spesifik untuk fasilitas kesehatan selama periode sakit seperti untuk transportasi, makan/minum, dan penginapan. Termasuk pengeluaran anggota keluarga [nama anak] yang menemani selama kunjungan pertama (kedua, ketiga,...).

Q36a. Apakah moda transportasi yang [nama anak] gunakan untuk menuju fasilitas kesehatan?

**Catatan pewawancara:** jika transportasi yang digunakan adalah mobil, tanyakan jarak dari rumah pasien ke fasilitas kesehatan

| Kunjungan | Moda Transportasi | Jarak (km) |
|-----------|-------------------|------------|
| Pertama   |                   |            |
| Kedua     |                   |            |
| Ketiga    |                   |            |
| Keempat   |                   |            |
| Kelima    |                   |            |
| Keenam    |                   |            |

Q36b. Mohon sebutkan perkiraan terbaik [nama anak] terkait pengeluaran mandiri untuk transportasi menuju fasilitas kesehatan)

*Jika keluarga memiliki kendaraan, perkiraan jarak tempuh perjalanan (pulang-pergi) dan gunakan IDR 16,000 per Km sebagai acuan dengan mobil dan IDR 14,000 per Km bila dengan motor. Jika tidak ada pengeluaran tuliskan "0,00".*

| Kunjungan | Jumlah, IDR | Tidak tahu (7) | Menolak menjawab (8) | Tidak dapat diterapkan (9) |
|-----------|-------------|----------------|----------------------|----------------------------|
| Pertama   |             |                |                      |                            |
| Kedua     |             |                |                      |                            |
| Ketiga    |             |                |                      |                            |
| Keempat   |             |                |                      |                            |
| Kelima    |             |                |                      |                            |
| Keenam    |             |                |                      |                            |

Q36c. Apakah moda transportasi yang [nama anak] gunakan dari fasilitas kesehatan?

**Catatan pewawancara:** jika transportasi yang digunakan adalah mobil, tanyakan jarak dari fasilitas kesehatan pasien ke rumah

| Kunjungan | Moda Transportasi | Jarak (km) |
|-----------|-------------------|------------|
| Pertama   |                   |            |
| Kedua     |                   |            |
| Ketiga    |                   |            |
| Keempat   |                   |            |
| Kelima    |                   |            |
| Keenam    |                   |            |

Q36b. Mohon sebutkan perkiraan terbaik [nama anak] terkait pengeluaran mandiri untuk transportasi dari fasilitas kesehatan) *Jika keluarga memiliki kendaraan, perkirakan jarak tempuh perjalanan (pulang-pergi) dan gunakan IDR 16,000 per Km sebagai acuan dengan mobil dan IDR 14,000 per Km bila dengan motor. Jika tidak ada pengeluaran tuliskan "0,00".*

| Kunjungan | Jumlah, IDR | Tidak tahu (7) | Menolak menjawab (8) | Tidak dapat diterapkan (9) |
|-----------|-------------|----------------|----------------------|----------------------------|
| Pertama   |             |                |                      |                            |
| Kedua     |             |                |                      |                            |
| Ketiga    |             |                |                      |                            |
| Keempat   |             |                |                      |                            |
| Kelima    |             |                |                      |                            |
| Keenam    |             |                |                      |                            |

Q36c. Apakah moda transportasi yang [nama anak] gunakan dari fasilitas kesehatan?

**Catatan pewawancara: jika transportasi yang digunakan adalah mobil, tanyakan jarak dari fasilitas kesehatan ke rumah pasien**

| Kunjungan | Moda Transportasi | Jarak (km) |
|-----------|-------------------|------------|
| Pertama   |                   |            |
| Kedua     |                   |            |
| Ketiga    |                   |            |
| Keempat   |                   |            |
| Kelima    |                   |            |
| Keenam    |                   |            |

Q37. Mohon sebutkan perkiraan terbaik [nama anak] terkait pengeluaran mandiri untuk makan/minum. *Jika tidak ada pengeluaran tuliskan "0,00".*

| Kunjungan | Jumlah, IDR | Tidak tahu (7) | Menolak menjawab (8) | Tidak dapat diterapkan (9) |
|-----------|-------------|----------------|----------------------|----------------------------|
| Pertama   |             |                |                      |                            |
| Kedua     |             |                |                      |                            |
| Ketiga    |             |                |                      |                            |
| Keempat   |             |                |                      |                            |
| Kelima    |             |                |                      |                            |
| Keenam    |             |                |                      |                            |

Q38. Mohon sebutkan perkiraan terbaik [nama anak] terkait pengeluaran mandiri untuk penginapan seperti hotel. *Jika tidak ada pengeluaran tuliskan "0,00".*

| Kunjungan | Jumlah, IDR | Tidak tahu (7) | Menolak menjawab (8) | Tidak dapat diterapkan (9) |
|-----------|-------------|----------------|----------------------|----------------------------|
| Pertama   |             |                |                      |                            |
| Kedua     |             |                |                      |                            |
| Ketiga    |             |                |                      |                            |
| Keempat   |             |                |                      |                            |
| Kelima    |             |                |                      |                            |
| Keenam    |             |                |                      |                            |

Q39. Apakah ada fasilitas kesehatan lain yang [nama anak] kunjungi selama periode sakit dimulai dari saat [nama anak] mulai merasa sakit? [Respons terhadap Q1]?

1 Ya **Ulangi proses dari Q28 hingga Q39**  
 0 Tidak

**Dampak penyakit pada anggota keluarga selama periode sakit**

**BACAAN:** Saya ingin mempelajari bagaimana dampak penyakit [nama anak] mempengaruhi [nama anak] dan tiap anggota keluarga. Anggota keluarga terdampak jika dia mengeluarkan waktu dan uang melebihi biasanya untuk merawat anak atau hilangnya waktu kerja, pendapatan, dan waktu sekolah karena sakit tersebut.

**BACAAN:** Mari kita bicara tentang [Nama anak] terlebih dahulu.

**Pasien**

- Q40. *Mohon tuliskan jenis kelamin pasien tanpa menanyakan kepadanya.*
- |   |           |
|---|-----------|
| 1 | Laki-laki |
| 2 | Perempuan |
- Q41. Berapa usia [nama anak] saat ini? \_\_\_\_\_
- |     |                  |
|-----|------------------|
| 999 | Tidak tahu       |
| 998 | Menolak menjawab |
- Q41a. Kapan tanggal lahir [nama anak] (hari/bulan/tahun)?
- |             |                  |
|-------------|------------------|
| ___/___/___ | dd/mm/yyyy       |
| 01/01/2097  | Tidak tahu       |
| 01/01/2098  | Menolak menjawab |
- Q42. Apa tingkat pendidikan terakhir yang [nama anak] selesaikan? (Pilih salah satu)  
*Tunjukkan Form 3*
- |    |                                                 |
|----|-------------------------------------------------|
| 01 | Tidak dapat baca-tulis                          |
| 02 | Mampu baca-tulis namun tidak sekolah            |
| 03 | Sekolah tapi hanya satu tahun                   |
| 04 | Taman kanak - kanak                             |
| 05 | Sekolah Dasar                                   |
| 06 | Sekolah Menengah Pertama                        |
| 07 | Sekolah Menengah Atas                           |
| 08 | Diploma                                         |
| 09 | Universitas, Sarjana                            |
| 10 | Universitas, Pasca Sarjana (Magister, Doktoral) |
| 11 | Ijazah profesi                                  |
| 97 | Tidak tahu                                      |
| 98 | Menolak menjawab                                |
| 99 | Tidak dapat diaplikasikan                       |
- Q43. Apakah [nama anak] saat ini sedang menempuh pendidikan?
- |   |                  |
|---|------------------|
| 1 | Ya               |
| 0 | Tidak            |
| 8 | Menolak menjawab |
- Lanjut ke Q46**  
**Lanjut ke Q46**
- Q44. Apakah [nama anak] kehilangan waktu sekolah [nama anak] selama sakit?
- |   |                  |
|---|------------------|
| 1 | Ya               |
| 0 | Tidak            |
| 8 | Menolak menjawab |
- Lanjut ke Q46**

- Q45. Berapa hari sekolah [nama anak] yang hilang karena sakit?  
Tuliskan "0" jika tidak ada
- |    |                        |
|----|------------------------|
| 97 | Tidak tahu             |
| 98 | Menolak menjawab       |
| 99 | Tidak dapat diterapkan |
- Q46. Apakah [nama anak] bekerja dan dibayar?
- |   |                            |
|---|----------------------------|
| 1 | Ya                         |
| 0 | Tidak <b>Lanjut ke Q52</b> |
| 8 | Menolak menjawab           |
- Q47. Apakah [nama anak] kehilangan hari kerja dan pendapatan selama sakit?  
*Jika pasien tidak kehilangan hari kerja, mohon konfirmasi apakah kehilangan pendapatan.*
- |   |                                       |
|---|---------------------------------------|
| 1 | Ya                                    |
| 0 | Tidak <b>Lanjut ke Q52</b>            |
| 7 | Tidak tahu <b>Lanjut ke Q52</b>       |
| 8 | Menolak menjawab <b>Lanjut ke Q52</b> |
- Q48. Berapa hari kerja [nama anak] yang hilang selama sakit?  
Tuliskan "0" jika tidak ada
- |    |                        |
|----|------------------------|
| 97 | Tidak tahu             |
| 98 | Menolak menjawab       |
| 99 | Tidak dapat diterapkan |
- Q49. Berapa pengeluaran [nama anak] yang hilang? (Berikan perkiraan terbaik [nama anak])
- |   |                        |
|---|------------------------|
| 7 | Tidak tahu             |
| 8 | Menolak menjawab       |
| 9 | Tidak dapat diterapkan |
- Q50. Apakah [nama anak] menerima kompensasi pendapatan selama [nama anak] sakit, apakah itu tempat kerja [nama anak] atau pihak lain yang menanggung selama [nama anak] sakit?
- |   |                                             |
|---|---------------------------------------------|
| 1 | Ya                                          |
| 0 | Tidak <b>Lanjut ke Q52</b>                  |
| 7 | Tidak tahu <b>Lanjut ke Q52</b>             |
| 8 | Menolak menjawab <b>Lanjut ke Q52</b>       |
| 9 | Tidak dapat diterapkan <b>Lanjut ke Q52</b> |
- Q51. Berapa hari gaji yang [nama anak] terima selama sakit?  
Tuliskan "0" jika tidak ada
- |    |                        |
|----|------------------------|
| 97 | Tidak tahu             |
| 98 | Menolak menjawab       |
| 99 | Tidak dapat diterapkan |
- Q52. Apakah Anda menerima bantuan keuangan atau non-keuangan dari keluarga atau komunitas selama [nama anak] sakit?
- |   |                                       |
|---|---------------------------------------|
| 1 | Ya                                    |
| 0 | Tidak <b>Lanjut ke Q55</b>            |
| 8 | Menolak menjawab <b>Lanjut ke Q55</b> |

Q53. Berapa perkiraan terbaik Anda nilai bantuan non-keuangan yang didapatkan?

*Benar 0 jika tidak ada bantuan non-keuangan.*

Tuliskan "0" jika tidak ada

- |    |       |                        |
|----|-------|------------------------|
| 97 | _____ | Tidak tahu             |
| 98 |       | Menolak menjawab       |
| 99 |       | Tidak dapat diterapkan |

**Catatan pewawancara:** Jika tidak tahu, tuliskan tipe bantuan non-keuangan yang diterima pasien dan keluarga pasien

---

Q54. Berapakah total bantuan keuangan yang didapatkan dalam IDR?

Tuliskan "0" jika tidak ada

- |    |       |                        |
|----|-------|------------------------|
| 97 | _____ | Tidak tahu             |
| 98 |       | Menolak menjawab       |
| 99 |       | Tidak dapat diterapkan |

### **Jumlah Anggota Keluarga**

Q55. Berapa jumlah anggota keluarga yang tinggal bersama? (selain Anda dan [nama anak])

- |    |       |                  |
|----|-------|------------------|
| 00 | _____ | No!              |
| 98 |       | Menolak menjawab |

Q56. Berapa anggota keluarga yang terdampak sakit [nama anak] secara langsung selama periode sakit [nama anak]?

**BACAKAN:** Anggota keluarga adalah mereka yang tinggal bersama Anda dan berbagi makanan. Anggota keluarga terdampak jika dia menghabiskan uang dan waktu lebih dari jumlah biasanya karena merawat Anda atau kehilangan waktu kerja, pendapatan, sekolah karena sakit [nama anak].

- |    |       |                  |
|----|-------|------------------|
| 00 | _____ | No!              |
| 98 |       | Menolak menjawab |

**BACAKAN:** Sekarang saya akan menanyakan Anda mengenai diri Anda dan anggota keluarga yang terdampak dari penyakit {nama anak}.

### **Yang merawat**

**BACAKAN:** Pertama saya akan menanyakan informasi tentang Anda.

Q57. Berapa umur Anda saat ini?

- |     |       |                  |
|-----|-------|------------------|
| 998 | _____ | Menolak menjawab |
|-----|-------|------------------|

Q58. Apa jenis kelamin yang diwawancarai? (*tidak perlu ditanyakan, cukup diisi*)

- |   |           |
|---|-----------|
| 0 | Laki-laki |
| 1 | Perempuan |

Q59. Apa tingkat pendidikan terakhir yang Anda selesaikan? (Pilih salah satu)

Tunjukkan Form 3

- 01 Tidak dapat baca-tulis
- 02 Mampu baca-tulis namun tidak sekolah
- 03 Sekolah tapi hanya satu tahun
- 04 Taman kanak - kanak
- 05 Sekolah Dasar
- 06 Sekolah Menengah Pertama
- 07 Sekolah Menengah Atas
- 08 Diploma
- 09 Universitas, Sarjana
- 10 Universitas, Pasca Sarjana (Magister, Doktoral)
- 11 Ijazah profesi
- 97 Tidak tahu
- 98 Menolak menjawab
- 99 Tidak dapat diterapkan

Q60. Apakah saat ini Anda tengah menempuh pendidikan?

- 1 Ya
- 0 Tidak
- 8 Menolak menjawab

Q61. Apakah Anda kehilangan waktu sekolah Anda selama [nama anak] sakit?

- 1 Ya
- 0 Tidak **Lanjut ke Q63**
- 8 Menolak menjawab **Lanjut ke Q63**

Q62. Berapa hari sekolah Anda yang hilang karena sakit [nama anak]?  
Tuliskan "0" jika tidak ada

- \_\_\_\_\_
- 97 Tidak tahu
- 98 Menolak menjawab

Q63. Apakah Anda bekerja dan dibayar?

- 1 Ya
- 0 Tidak **Lanjut ke Q69**
- 8 Menolak menjawab **Lanjut ke Q69**

Q64. Apakah Anda kehilangan hari kerja selama [nama anak] sakit?

- 1 Ya
- 0 Tidak **Lanjut ke Q69**
- 8 Menolak menjawab **Lanjut ke Q69**

Q65. Berapa hari kerja Anda yang hilang selama sakitnya [nama anak]?

- \_\_\_\_\_
- 97 Tidak tahu
- 98 Menolak menjawab
- 99 Tidak dapat diterapkan

Q66. Apakah Anda menerima kompensasi pendapatan selama Anda sakit, apakah itu tempat kerja Anda atau pihak lain yang menanggung selama [nama anak] sakit?

- |   |                        |                       |
|---|------------------------|-----------------------|
| 1 | Ya                     |                       |
| 0 | Tidak                  | <b>Lanjut ke Q68a</b> |
| 7 | Tidak tahu             | <b>Lanjut ke Q68a</b> |
| 8 | Menolak menjawab       | <b>Lanjut ke Q68a</b> |
| 9 | Tidak dapat diterapkan | <b>Lanjut ke Q68a</b> |

Q67. Berapa hari gaji yang Anda terima selama periode sakit [nama anak]?  
Tuliskan "0" jika tidak ada

- |    |                        |
|----|------------------------|
| 97 | Tidak tahu             |
| 98 | Menolak menjawab       |
| 99 | Tidak dapat diterapkan |

Q68a. Apakah Anda kehilangan pendapatan selama [nama anak] sakit?

- |   |                  |                      |
|---|------------------|----------------------|
| 1 | Ya               |                      |
| 0 | Tidak            | <b>Lanjut ke Q69</b> |
| 8 | Menolak menjawab | <b>Lanjut ke Q69</b> |

Q68b. Berapa pendapatan Anda yang hilang? (Berikan perkiraan terbaik Anda)

- |   |                        |
|---|------------------------|
| 7 | Tidak tahu             |
| 8 | Menolak menjawab       |
| 9 | Tidak dapat diterapkan |

Q69. Dari jumlah hari sakit selama periode sakit, berapa jumlah tambahan hari yang Anda berikan ke [Nama anak]?

- |    |                        |                      |
|----|------------------------|----------------------|
| 00 | No                     | <b>Lanjut ke Q71</b> |
| 97 | Tidak tahu             | <b>Lanjut ke Q71</b> |
| 98 | Menolak menjawab       | <b>Lanjut ke Q71</b> |
| 99 | Tidak dapat diterapkan | <b>Lanjut ke Q71</b> |

**BACAAN:** Dari pertanyaan berikut, pikirkan tentang jumlah tambahan jam per hari yang [nama anak] dapatkan dari anggota keluarga. Tambahan jam merujuk pada jumlah jam diluar biasanya anggota keluarga menghabiskan waktu bersama [nama anak]. Dalam memperkirakan waktu, mohon masukkan waktu di rumah, pada fasilitas kesehatan dan selama perjalanan menuju dan dari fasilitas kesehatan.

Q70. Selama periode ini [Respons terhadap Q69], berapa rata – rata jumlah tambahan jam Anda untuk merawat [nama anak]?

*Jika tidak ada, masukkan 0*

- |    |                        |
|----|------------------------|
| 97 | Tidak tahu             |
| 98 | Menolak menjawab       |
| 99 | Tidak dapat diterapkan |

Q71. Apakah ada pengeluaran transportasi, makan/minum dan penginapan tambahan dari yang telah disebutkan sebelumnya untuk mengunjungi fasilitas kesehatan?

- |   |                  |                                        |
|---|------------------|----------------------------------------|
| 1 | Ya               |                                        |
| 0 | No               | <b>Lanjut ke instruksi sebelum Q73</b> |
| 7 | Tidak tahu       | <b>Lanjut ke instruksi sebelum Q73</b> |
| 8 | Menolak menjawab | <b>Lanjut ke instruksi sebelum Q73</b> |



Q72. Untuk pertanyaan berikut ini, berikan perkiraan terbaik terhadap jumlah total tambahan pengeluaran dari tambahan hari untuk merawat nama anak] yang belum termasuk yang disebutkan pada pertanyaan sebelumnya? *Jika tidak ada pengeluaran, tuliskan "0,00"*

IDR \_\_\_\_\_  
 7 \_\_\_\_\_ Tidak tahu  
 8 \_\_\_\_\_ Menolak menjawab

*Jika Q56 sama dengan 1, maka akhiri wawancara*

**BACAKAN:** Pikirkan mengenai anggota keluarga kedua (ketiga, keempat...) yang terdampak penyakit [Nama anak] selama periode sakit

Q73. Apa hubungan anggota keluarga berikut (pertama, kedua,...) dengan [nama anak]? (pilih salah satu)  
 Tunjukkan form 4

| Hubungan                       | Anggota Keluarga |                |                 |                |                |                 |                   |
|--------------------------------|------------------|----------------|-----------------|----------------|----------------|-----------------|-------------------|
|                                | Anggota kedua    | Anggota ketiga | Anggota keempat | Anggota kelima | Anggota keenam | Anggota ketujuh | Anggota kedelapan |
| Ibu (01)                       |                  |                |                 |                |                |                 |                   |
| Ayah (02)                      |                  |                |                 |                |                |                 |                   |
| Suami (03)                     |                  |                |                 |                |                |                 |                   |
| Istri (04)                     |                  |                |                 |                |                |                 |                   |
| Teman serumah (05)             |                  |                |                 |                |                |                 |                   |
| Saudara perempuan (06)         |                  |                |                 |                |                |                 |                   |
| Saudara laki-laki (07)         |                  |                |                 |                |                |                 |                   |
| Anak laki-laki (08)            |                  |                |                 |                |                |                 |                   |
| Anak perempuan (09)            |                  |                |                 |                |                |                 |                   |
| Nenek (10)                     |                  |                |                 |                |                |                 |                   |
| Kakek (11)                     |                  |                |                 |                |                |                 |                   |
| Paman (12)                     |                  |                |                 |                |                |                 |                   |
| Bibi (13)                      |                  |                |                 |                |                |                 |                   |
| Pembantu (14)                  |                  |                |                 |                |                |                 |                   |
| Pengasuh (15)                  |                  |                |                 |                |                |                 |                   |
| Lainnya (16)<br>sebutkan _____ |                  |                |                 |                |                |                 |                   |
| Menolak menjawab (98)          |                  |                |                 |                |                |                 |                   |
| Tidak dapat diaplikasikan (99) |                  |                |                 |                |                |                 |                   |

Q74. Berapa usia anggota keluarga?

| Anggota keluarga  | Usia dalam tahun | Tidak tahu (997) | Menolak menjawab (998) |
|-------------------|------------------|------------------|------------------------|
| Anggota kedua     |                  |                  |                        |
| Anggota ketiga    |                  |                  |                        |
| Anggota keempat   |                  |                  |                        |
| Anggota kelima    |                  |                  |                        |
| Anggota keenam    |                  |                  |                        |
| Anggota ketujuh   |                  |                  |                        |
| Anggota kedelapan |                  |                  |                        |

Q75. Apa tingkat pendidikan terakhir anggota keluarga? (pilih salah satu)

Tunjukkan form 3

| Hubungan                                           | Anggota Keluarga |                |                 |                |                |                 |                   |
|----------------------------------------------------|------------------|----------------|-----------------|----------------|----------------|-----------------|-------------------|
|                                                    | Anggota kedua    | Anggota ketiga | Anggota keempat | Anggota kelima | Anggota keenam | Anggota ketujuh | Anggota kedelapan |
| Tidak dapat baca-tulis (01)                        |                  |                |                 |                |                |                 |                   |
| Mampu baca-tulis namun tidak sekolah (02)          |                  |                |                 |                |                |                 |                   |
| Sekolah tapi hanya satu tahun (03)                 |                  |                |                 |                |                |                 |                   |
| Taman kanak - kanak (04)                           |                  |                |                 |                |                |                 |                   |
| Sekolah Dasar (05)                                 |                  |                |                 |                |                |                 |                   |
| Sekolah Menengah Pertama (06)                      |                  |                |                 |                |                |                 |                   |
| Sekolah Menengah Atas (07)                         |                  |                |                 |                |                |                 |                   |
| Diploma (08)                                       |                  |                |                 |                |                |                 |                   |
| Universitas, Sarjana (09)                          |                  |                |                 |                |                |                 |                   |
| Universitas, Pasca Sarjana (Magister, Doktor) (10) |                  |                |                 |                |                |                 |                   |
| Ijazah profesi (11)                                |                  |                |                 |                |                |                 |                   |
| Tidak tahu (97)                                    |                  |                |                 |                |                |                 |                   |
| Menolak menjawab (98)                              |                  |                |                 |                |                |                 |                   |

Q76. Apakah ada anggota keluarga saat ini sedang menempuh pendidikan?

| Anggota keluarga  | Ya (kode:1) | Tidak (Kode:2) | Lanjut ke Q79 | Tidak tahu (Kode:7) | Lanjut ke Q79 | Menolak menjawab (Kode:8) | Lanjut ke Q79 |
|-------------------|-------------|----------------|---------------|---------------------|---------------|---------------------------|---------------|
| Anggota kedua     |             |                |               |                     |               |                           |               |
| Anggota ketiga    |             |                |               |                     |               |                           |               |
| Anggota keempat   |             |                |               |                     |               |                           |               |
| Anggota kelima    |             |                |               |                     |               |                           |               |
| Anggota keenam    |             |                |               |                     |               |                           |               |
| Anggota ketujuh   |             |                |               |                     |               |                           |               |
| Anggota kedelapan |             |                |               |                     |               |                           |               |

Q77. Apakah ada anggota keluarga kehilangan hari sekolah karena penyakit [nama anak]?

| Anggota keluarga  | Ya (kode:1) | Tidak (Kode:2) | Lanjut ke Q79 | Tidak tahu (Kode:7) | Lanjut ke Q79 | Menolak menjawab (Kode:8) | Lanjut ke Q79 |
|-------------------|-------------|----------------|---------------|---------------------|---------------|---------------------------|---------------|
| Anggota kedua     |             |                |               |                     |               |                           |               |
| Anggota ketiga    |             |                |               |                     |               |                           |               |
| Anggota keempat   |             |                |               |                     |               |                           |               |
| Anggota kelima    |             |                |               |                     |               |                           |               |
| Anggota keenam    |             |                |               |                     |               |                           |               |
| Anggota ketujuh   |             |                |               |                     |               |                           |               |
| Anggota kedelapan |             |                |               |                     |               |                           |               |

Q78. Berapa hari sekolah anggota keluarga yang hilang karena penyakit [nama anak]?

Tuliskan "0" jika tidak ada

| Anggota keluarga  | Jumlah hari yang hilang | Tidak tahu (97) | Menolak menjawab (98) |
|-------------------|-------------------------|-----------------|-----------------------|
| Anggota kedua     |                         |                 |                       |
| Anggota ketiga    |                         |                 |                       |
| Anggota keempat   |                         |                 |                       |
| Anggota kelima    |                         |                 |                       |
| Anggota keenam    |                         |                 |                       |
| Anggota ketujuh   |                         |                 |                       |
| Anggota kedelapan |                         |                 |                       |

Q79. Apakah anggota keluarga bekerja dan dibayar?

| Anggota keluarga  | Ya (kode:1) | Tidak (Kode:2) | Lanjut ke Q84a | Tidak tahu (Kode:7) | Lanjut ke Q84a | Menolak menjawab (Kode:8) | Lanjut ke Q84a |
|-------------------|-------------|----------------|----------------|---------------------|----------------|---------------------------|----------------|
| Anggota kedua     |             |                |                |                     |                |                           |                |
| Anggota ketiga    |             |                |                |                     |                |                           |                |
| Anggota keempat   |             |                |                |                     |                |                           |                |
| Anggota kelima    |             |                |                |                     |                |                           |                |
| Anggota keenam    |             |                |                |                     |                |                           |                |
| Anggota ketujuh   |             |                |                |                     |                |                           |                |
| Anggota kedelapan |             |                |                |                     |                |                           |                |

Q80. Apakah ada anggota keluarga kehilangan hari kerja karena penyakit [nama anak]?

| Anggota keluarga  | Ya (kode:1) | Tidak (Kode:2) | Lanjut ke Q84a | Tidak tahu (Kode:7) | Lanjut ke Q84a | Menolak menjawab (Kode:8) | Lanjut ke Q84a |
|-------------------|-------------|----------------|----------------|---------------------|----------------|---------------------------|----------------|
| Anggota kedua     |             |                |                |                     |                |                           |                |
| Anggota ketiga    |             |                |                |                     |                |                           |                |
| Anggota keempat   |             |                |                |                     |                |                           |                |
| Anggota kelima    |             |                |                |                     |                |                           |                |
| Anggota keenam    |             |                |                |                     |                |                           |                |
| Anggota ketujuh   |             |                |                |                     |                |                           |                |
| Anggota kedelapan |             |                |                |                     |                |                           |                |

Q81. Berapa hari kerja anggota keluarga yang hilang karena penyakit [nama anak]?

Tuliskan "0" jika tidak ada

| Anggota keluarga  | Jumlah hari | Tidak tahu (Kode:97) | Lanjut ke Q85 | Menolak menjawab (Kode:98) | Lanjut ke Q85 | Tidak dapat diterapkan (Kode:99) | Lanjut ke Q85 |
|-------------------|-------------|----------------------|---------------|----------------------------|---------------|----------------------------------|---------------|
| Anggota kedua     |             |                      |               |                            |               |                                  |               |
| Anggota ketiga    |             |                      |               |                            |               |                                  |               |
| Anggota keempat   |             |                      |               |                            |               |                                  |               |
| Anggota kelima    |             |                      |               |                            |               |                                  |               |
| Anggota keenam    |             |                      |               |                            |               |                                  |               |
| Anggota ketujuh   |             |                      |               |                            |               |                                  |               |
| Anggota kedelapan |             |                      |               |                            |               |                                  |               |

Q82. Apakah anggota keluarga menerima kompensasi atas absennya mereka dari pekerjaan ketika merawat [nama anak] sakit? (dari tempat kerja atau pihak lain yang menanggung)

| Anggota keluarga  | Ya (Kode: 1) | Tidak (Kode: 0) | <b>Lanjut ke Q84a</b> | Tidak tahu (Kode:7) | <b>Lanjut ke Q84a</b> | Menolak menjawab (Kode:8) | <b>Lanjut ke Q84a</b> | Tidak dapat diterapkan (Kode:9) | <b>Lanjut ke Q84a</b> |
|-------------------|--------------|-----------------|-----------------------|---------------------|-----------------------|---------------------------|-----------------------|---------------------------------|-----------------------|
| Anggota kedua     |              |                 |                       |                     |                       |                           |                       |                                 |                       |
| Anggota ketiga    |              |                 |                       |                     |                       |                           |                       |                                 |                       |
| Anggota keempat   |              |                 |                       |                     |                       |                           |                       |                                 |                       |
| Anggota kelima    |              |                 |                       |                     |                       |                           |                       |                                 |                       |
| Anggota keenam    |              |                 |                       |                     |                       |                           |                       |                                 |                       |
| Anggota ketujuh   |              |                 |                       |                     |                       |                           |                       |                                 |                       |
| Anggota kedelapan |              |                 |                       |                     |                       |                           |                       |                                 |                       |

Q83. Berapa hari yang dibayarkan ke anggota keluarga?

| Anggota keluarga  | Jumlah hari yang dibayarkan | Tidak tahu (97) | Menolak menjawab (98) |
|-------------------|-----------------------------|-----------------|-----------------------|
| Anggota kedua     |                             |                 |                       |
| Anggota ketiga    |                             |                 |                       |
| Anggota keempat   |                             |                 |                       |
| Anggota kelima    |                             |                 |                       |
| Anggota keenam    |                             |                 |                       |
| Anggota ketujuh   |                             |                 |                       |
| Anggota kedelapan |                             |                 |                       |

Q84a. Apakah anggota keluarga Anda kehilangan pendapatan karena penyakit [nama anak]?

| Anggota keluarga  | Ya (kode:1) | Tidak (Kode:2) | <b>Lanjut ke Q85</b> | Tidak tahu (Kode:7) | <b>Lanjut ke Q85</b> | Menolak menjawab (Kode:8) | <b>Lanjut ke Q85</b> |
|-------------------|-------------|----------------|----------------------|---------------------|----------------------|---------------------------|----------------------|
| Anggota kedua     |             |                |                      |                     |                      |                           |                      |
| Anggota ketiga    |             |                |                      |                     |                      |                           |                      |
| Anggota keempat   |             |                |                      |                     |                      |                           |                      |
| Anggota kelima    |             |                |                      |                     |                      |                           |                      |
| Anggota keenam    |             |                |                      |                     |                      |                           |                      |
| Anggota ketujuh   |             |                |                      |                     |                      |                           |                      |
| Anggota kedelapan |             |                |                      |                     |                      |                           |                      |

Q84b. Berapa pendapatan anggota keluarga yang hilang? (Mohon berikan perkiraan terbaik).

*Jika tidak ada tuliskan "0,00".*

| Anggota keluarga  | Jumlah, IDR | Tidak tahu (7) | Menolak menjawab (8) | Tidak dapat diterapkan (9) |
|-------------------|-------------|----------------|----------------------|----------------------------|
| Anggota kedua     |             |                |                      |                            |
| Anggota ketiga    |             |                |                      |                            |
| Anggota keempat   |             |                |                      |                            |
| Anggota kelima    |             |                |                      |                            |
| Anggota keenam    |             |                |                      |                            |
| Anggota ketujuh   |             |                |                      |                            |
| Anggota kedelapan |             |                |                      |                            |

Q85. Dari jumlah hari sakit selama episode sakit [nama anak] yang dimulai sejak sakit hingga saat pemulihan (tanggal wawancara), berapa jumlah hari tambahan yang dihabiskan anggota keluarga untuk perawatan lanjutan [nama anak]?  
*Jika tidak ada, masukkan 0*

| Anggota keluarga  | Jumlah hari | <i>Jika "No" Lanjut ke Q87</i> | Tidak tahu (Kode:97) | <i>Lanjut ke Q97</i> | Menolak menjawab (Kode:98) | <i>Lanjut ke Q87</i> | Tidak dapat diterapkan (Kode:99) | <i>Lanjut ke Q87</i> |
|-------------------|-------------|--------------------------------|----------------------|----------------------|----------------------------|----------------------|----------------------------------|----------------------|
| Anggota kedua     |             |                                |                      |                      |                            |                      |                                  |                      |
| Anggota ketiga    |             |                                |                      |                      |                            |                      |                                  |                      |
| Anggota keempat   |             |                                |                      |                      |                            |                      |                                  |                      |
| Anggota kelima    |             |                                |                      |                      |                            |                      |                                  |                      |
| Anggota keenam    |             |                                |                      |                      |                            |                      |                                  |                      |
| Anggota ketujuh   |             |                                |                      |                      |                            |                      |                                  |                      |
| Anggota kedelapan |             |                                |                      |                      |                            |                      |                                  |                      |

**BACAKAN:** Dari pertanyaan berikut, pikirkan tentang jumlah tambahan jam per hari yang Anda dapatkan dari anggota keluarga. Tambahan jam merujuk pada jumlah jam diluar biasanya anggota keluarga menghabiskan waktu bersama Anda. Dalam memperkirakan waktu, mohon masukkan waktu di rumah, pada fasilitas kesehatan dan selama perjalanan menuju dan dari fasilitas kesehatan.

Q86. Selama periode ini, berapa rata – rata jumlah tambahan jam anggota keluarga untuk merawat [nama anak]? [Respons terhadap Q68]  
*Jika tidak ada, masukkan 0*

| Anggota keluarga  | Rata-rata tambahan jam untuk perawatan harian | Tidak tahu (Kode:97) | Menolak menjawab (Kode:98) | Tidak dapat diterapkan (Kode:99) |
|-------------------|-----------------------------------------------|----------------------|----------------------------|----------------------------------|
| Anggota kedua     |                                               |                      |                            |                                  |
| Anggota ketiga    |                                               |                      |                            |                                  |
| Anggota keempat   |                                               |                      |                            |                                  |
| Anggota kelima    |                                               |                      |                            |                                  |
| Anggota keenam    |                                               |                      |                            |                                  |
| Anggota ketujuh   |                                               |                      |                            |                                  |
| Anggota kedelapan |                                               |                      |                            |                                  |

Q87. Apakah ada pengeluaran transportasi, makan/minum dan penginapan tambahan dari yang telah disebutkan sebelumnya untuk mengunjungi fasilitas kesehatan?

| Anggota keluarga  | Ya (Kode:1) | No (Kode:0) | <i>Lanjut ke anggota keluarga lainnya</i> | Tidak tahu (Kode:7) | <i>Lanjut ke anggota keluarga lainnya</i> | Menolak menjawab (Kode:8) | <i>Lanjut ke anggota keluarga lainnya</i> | Tidak dapat diterapkan (Kode:9) | <i>Lanjut ke anggota keluarga lainnya</i> |
|-------------------|-------------|-------------|-------------------------------------------|---------------------|-------------------------------------------|---------------------------|-------------------------------------------|---------------------------------|-------------------------------------------|
| Anggota kedua     |             |             |                                           |                     |                                           |                           |                                           |                                 |                                           |
| Anggota ketiga    |             |             |                                           |                     |                                           |                           |                                           |                                 |                                           |
| Anggota keempat   |             |             |                                           |                     |                                           |                           |                                           |                                 |                                           |
| Anggota kelima    |             |             |                                           |                     |                                           |                           |                                           |                                 |                                           |
| Anggota keenam    |             |             |                                           |                     |                                           |                           |                                           |                                 |                                           |
| Anggota ketujuh   |             |             |                                           |                     |                                           |                           |                                           |                                 |                                           |
| Anggota kedelapan |             |             |                                           |                     |                                           |                           |                                           |                                 |                                           |

Q88. Untuk pertanyaan berikut ini, berikan perkiraan terbaik terhadap jumlah total tambahan pengeluaran dari tambahan hari untuk merawat Anda yang belum termasuk yang disebutkan pada pertanyaan sebelumnya? [Jumlah hari yang dilaporkan pada Q68]

*Jika tidak ada pengeluaran, tuliskan "0,00".*

| Anggota keluarga  | Amount, IDR | Tidak tahu (7) | Menolak menjawab (8) | Tidak dapat diterapkan (9) |
|-------------------|-------------|----------------|----------------------|----------------------------|
| Anggota kedua     |             |                |                      |                            |
| Anggota ketiga    |             |                |                      |                            |
| Anggota keempat   |             |                |                      |                            |
| Anggota kelima    |             |                |                      |                            |
| Anggota keenam    |             |                |                      |                            |
| Anggota ketujuh   |             |                |                      |                            |
| Anggota kedelapan |             |                |                      |                            |

*Cek Q56, jika jawabannya lebih dari 1, maka ulangi Q57-71 untuk semua anggota keluarga terdaftar. Jika Q56 sama dengan 1, maka bacakan kalimat berikut untuk mengakhiri wawancara.*

**BACAKAN:** Terima kasih atas partisipasi Anda! Jika ada pertanyaan lebih lanjut terkait wawancara atau hasil penelitian ini, Anda dapat menghubungi saya, dr. Nandy N. Wilastonegoro, MScIH di nomor 0813-2884-3888 atau 0274-5306089 di Fakultas Kedokteran, Kesehatan Masyarakat dan Keperawatan, Universitas Gadjah Mada (FKKMK UGM).

## **Supplementary Information**

### **Cost of dengue illness in Indonesia across hospital, ambulatory and non-medical settings**

#### Table Contents

- S5: Table S5. Studies on cost of a dengue episode in the literature by country
- S6: Table S6. Studies on cost of a dengue episode in the literature by region
- S7: Table S7. Dengue economic burden by type of case and source of financing (in millions of 2017 US\$)

1 Table S5. Studies on cost of a dengue episode in the literature by country

| Study and publication<br>year           | Location and data<br>year | <u>Hospital cases</u> |          | <u>Ambulatory cases</u> |          |
|-----------------------------------------|---------------------------|-----------------------|----------|-------------------------|----------|
|                                         |                           | Original              | Adjusted | Original                | Adjusted |
| <u>Asian studies</u>                    |                           |                       |          |                         |          |
| Vo et al. <sup>1</sup>                  | Vietnam, 2012             | 48.10                 | 111.29   | NA                      | NA       |
| Edillo et al. <sup>2</sup>              | Philippines, 2012         | 1,048.73              | 1,245.81 | 259.18                  | 307.88   |
| Shepard et al. <sup>3</sup>             | Malaysia, 2010            | 433.23                | 151.10   | 210.14                  | 73.29    |
| Tran et al. <sup>4</sup>                | Vietnam, 2017             | 110.10                | 254.74   | 36.10                   | 83.53    |
| Nadjib et al., 2019 <sup>5</sup>        | Indonesia, 2015           | 458.14                | 472.83   | 59.29                   | 61.19    |
| Hariharan et al. <sup>6</sup>           | India, 2013               | 276.10                | 643.02   | 14.25                   | 33.19    |
| Harving & Rönsholt <sup>7</sup>         | Vietnam, 2005             | 61.36                 | 344.78   | NA                      | NA       |
| Tozan et al. <sup>8</sup>               | Thailand, 2015            | 157.68                | 97.76    | NA                      | NA       |
| Average                                 |                           | NA                    |          | NA                      |          |
| <u>Latin American studies</u>           |                           |                       |          |                         |          |
| Armien et al. <sup>9</sup>              | Panama, 2005              | 1,065                 | 778.95   | 332                     | 242.83   |
| Undurraga et al.,<br>2015 <sup>10</sup> | Mexico, 2012              | 240.04                | 87.15    | 65.53                   | 23.79    |
| Halasa et al., 2012 <sup>11</sup>       | Puerto Rico, 2010         | 5,497.00              | 1,150.08 | 1,236                   | 258.60   |
| Martelli et al., 2015 <sup>12</sup>     | Brazil, 2013              | 618.33                | 171.95   | 181.83                  | 50.56    |
| <u>Other regions</u>                    |                           |                       |          |                         |          |
| Suaya et al., 2009 <sup>13</sup>        | Brazil, 2005              | 676.00                | 601.27   | 291.00                  | 258.83   |
|                                         | El Salvador, 2005         | 457.00                | 668.50   | 88.00                   | 128.73   |
|                                         | Guatemala, 2005           | 418.00                | 736.18   | 88.00                   | 154.99   |



| <b>Study and publication</b>      | <b>Location and data</b> | <b>Hospital cases</b> |                 | <b>Ambulatory cases</b> |                 |
|-----------------------------------|--------------------------|-----------------------|-----------------|-------------------------|-----------------|
| <b>year</b>                       | <b>year</b>              | <b>Original</b>       | <b>Adjusted</b> | <b>Original</b>         | <b>Adjusted</b> |
|                                   | Panama, 2005             | 1,065.00              | 778.95          | 332.00                  | 242.83          |
|                                   | Venezuela, 2005          | 672.00                | 452.05          | 168.00                  | 121.12          |
|                                   | Cambodia, 2005           | 115.00                | 885.00          | NA                      | NA              |
|                                   | Malaysia, 2005           | 947.00                | 634.92          | 317.00                  | 212.53          |
|                                   | Thailand, 2005           | 573.00                | 727.03          | NA                      | NA              |
| Shepard et al., 2013 <sup>3</sup> | Bhutan, 2010             | 207.30                | 372.51          | 62.30                   | 111.95          |
|                                   | Brunei, 2010             | 2,481.00              | 263.75          | 809.70                  | 86.08           |
|                                   | Cambodia, 2010           | 116.08                | 724.99          | 23.46                   | 110.73          |
|                                   | Timor Leste, 2010        | 66.00                 | 83.15           | 19.20                   | 24.19           |
|                                   | Indonesia, 2010          | 289.10                | 406.12          | 87.60                   | 123.06          |
|                                   | Laos, 2010               | 107.20                | 1,023.41        | 31.60                   | 310.10          |
|                                   | Malaysia, 2010           | 863.21                | 368.61          | 422.20                  | 180.29          |
|                                   | Myanmar, 2010            | 81.50                 | 335.48          | 23.90                   | 98.38           |
|                                   | Philippines, 2010        | 212.20                | 304.12          | 63.70                   | 91.29           |
|                                   | Singapore, 2010          | 3008.47               | 1,268.28        | 1268.28                 | 237.78          |
|                                   | Thailand, 2010           | 634.87                | 490.71          | 158.72                  | 122.68          |
|                                   | Viet Nam, 2010           | 76.41                 | 216.39          | 31.46                   | 89.09           |

2 Notes: Nadjib et al.<sup>5</sup> examined cost across three sites from Indonesia: Yogyakarta, Bali and Jakarta. We extracted  
3 the costs by site and by setting from their Table 2 to calculate the arithmetic averages of for both hospital and  
4 ambulatory services. Tozen et al.<sup>8</sup> examined cost based on diagnosis of DF and DHF per adult and pediatric case.  
5 Similarly, we used data from their Table 5 to calculate the arithmetic average cost of the diagnosis and age group.  
6 Martelli et al.<sup>12</sup> examined cost across six sites from Brazil both public and private sectors: Goiania, Belo Horizonte,  
7 Rio de Janeiro, Teresina, Recife, and Belem. We used data in their Table 3 to calculate the arithmetic average of  
8 the three sites for both hospital and ambulatory services. NA denotes not applicable.

9

10 Table S6. Studies on cost of a dengue episode in the literature by region

| Study and publication<br>year      | Location and<br>data year                                   | Hospital cases |           | Ambulatory cases |           |
|------------------------------------|-------------------------------------------------------------|----------------|-----------|------------------|-----------|
|                                    |                                                             | Original       | Adjusted* | Original         | Adjusted* |
| Shepard et al., 2016 <sup>14</sup> | Global average,<br>2013                                     | 389.00         | 126.92    | 106              | 14.36     |
|                                    | Central Europe,<br>eastern Europe,<br>Central Asia,<br>2013 | 287.00         | 99.87     | 64               | 22.27     |
|                                    | High-income,<br>2013                                        | 3809.00        | 320.07    | 678              | 56.97     |
|                                    | Latin America<br>and the<br>Caribbean, 2013                 | 1360.00        | 477.97    | 160              | 56.23     |
|                                    | North Africa and<br>the Middle East,<br>2013                | 333.00         | 135.54    | 75               | 30.54     |
|                                    | South Asia, 2013                                            | 260.00         | 634.62    | 35               | 85.43     |
|                                    | Southeast Asia,<br>east Asia, and<br>Oceania, 2013          | 447            | NA        | 117              | NA        |
|                                    | Sub-Saharan<br>Africa, 2013                                 | 206            | 425.14    | 44               | 90.81     |

|                                    |                                             |           |        |          |        |
|------------------------------------|---------------------------------------------|-----------|--------|----------|--------|
| Shepard et al., 2011 <sup>15</sup> | North America,<br>2010                      | 11,340.50 | 827.25 | 1,477.50 | 107.78 |
|                                    | Latin America<br>and The<br>Caribbean, 2010 | 2,126.33  | 946.04 | 590.43   | 262.69 |

---

11 \* Adjusted numbers are scaled to the ratio of the per capita GNI of the region or country compared to  
12 that in Indonesia.

13 Table S7. Dengue economic burden by type of case and source of financing (in millions of 2017 US\$)

| Location                           | Household        | Family/friend  | JKN            | Other          | Total             |
|------------------------------------|------------------|----------------|----------------|----------------|-------------------|
|                                    | resources        | contribution   |                |                |                   |
| <u>Non-fatal cases only</u>        |                  |                |                |                |                   |
|                                    | 140.07           | 75.45          | 95.03          | 69.13          | 379.69            |
| National                           | (33.87-740.36)   | (21.57-274.91) | (26.84-365.98) | (18.81-297.07) | (101.09-1,678.32) |
| Percentage                         | 37%              | 20%            | 25%            | 18%            | 100%              |
| Yogyakarta                         | 0.51             | 0.30           | 0.39           | 0.28           | 1.47              |
| City                               | (0.09-20.06)     | (0.07--2.42)   | (0.08-4.74)    | (0.06-5.73)    | (0.30-32.95)      |
|                                    | 34%              | 20%            | 26%            | 19%            | 100%              |
| <u>All cases (including fatal)</u> |                  |                |                |                |                   |
|                                    | 441.65           | 75.45          | 95.03          | 69.13          | 681.26            |
|                                    | (165.06-1433.60) | (21.57-274.91) | (26.84-365.98) | (18.81-297.07) | (232.28-2,371.56) |
| National                           | 1433.60)         |                |                |                |                   |
| Percentage                         | 65%              | 11%            | 14%            | 10%            | 100%              |

14

## Supplementary Information

### Cost of dengue illness in Indonesia across hospital, ambulatory and non-medical settings

#### Figure Contents

- S8: Figure S8. Histogram of direct medical cost per hospitalized case in Yogyakarta, Indonesia (n=20)
- S9: Figure S9. Histogram of non-medical cost per hospitalized case in Yogyakarta, Indonesia (n=20)
- S10: Figure S10. Histogram of indirect cost per hospitalized case in Yogyakarta, Indonesia (n=20)
- S11: Figure S11. Histogram of total cost per hospitalized case in Yogyakarta, Indonesia (n=20)

1 Figure S8. Histogram of direct medical cost per hospitalized case in Yogyakarta, Indonesia (n=20)

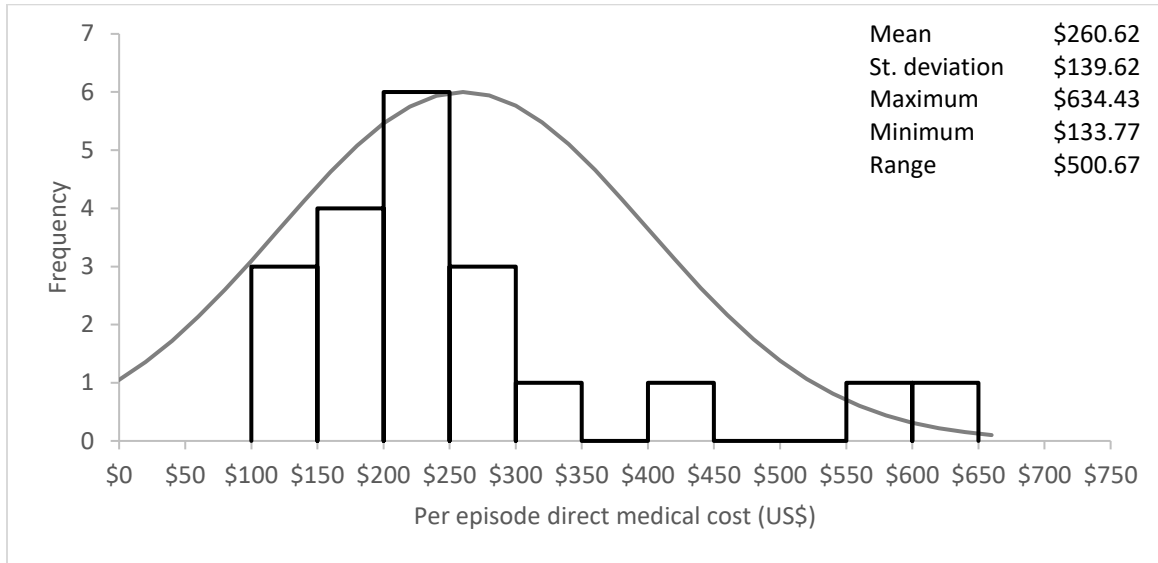

2

3 Notes: St. deviation denotes standard deviation; US\$ denotes United States dollars

4 Figure S9. Histogram of non-medical cost per hospitalized case in Yogyakarta, Indonesia (n=20)

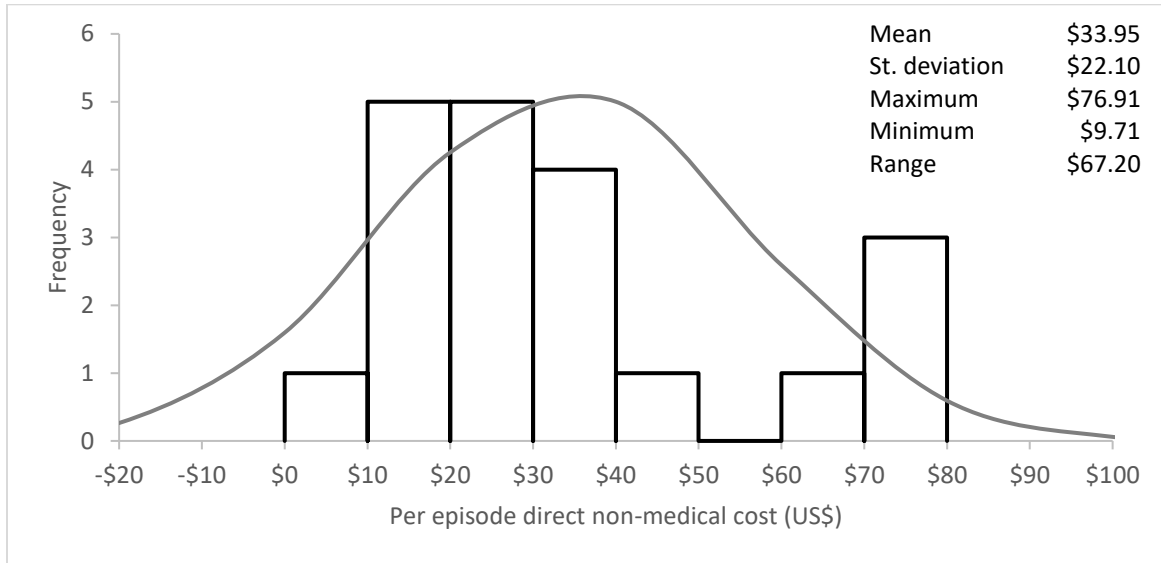

5

6 Notes: St. deviation denotes standard deviation; US\$ denotes United States dollars

7 Figure S10. Histogram of indirect cost per hospitalized case in Yogyakarta, Indonesia (n=20)

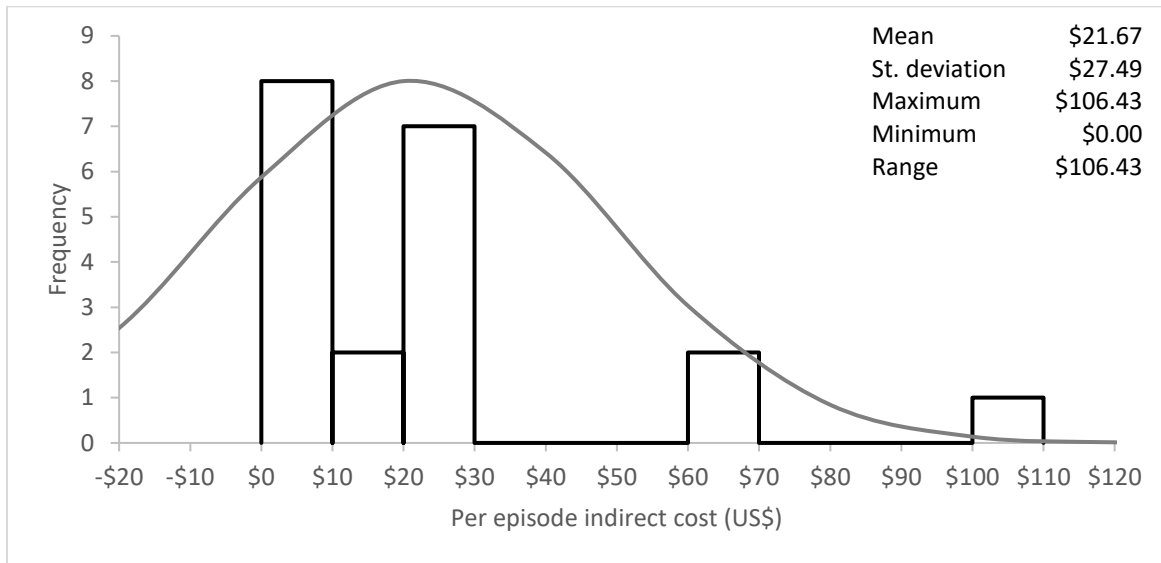

8

9 Notes: St. deviation denotes standard deviation; US\$ denotes United States dollars



10 Figure S11. Histogram of total cost per hospitalized case in Yogyakarta, Indonesia (n=20)

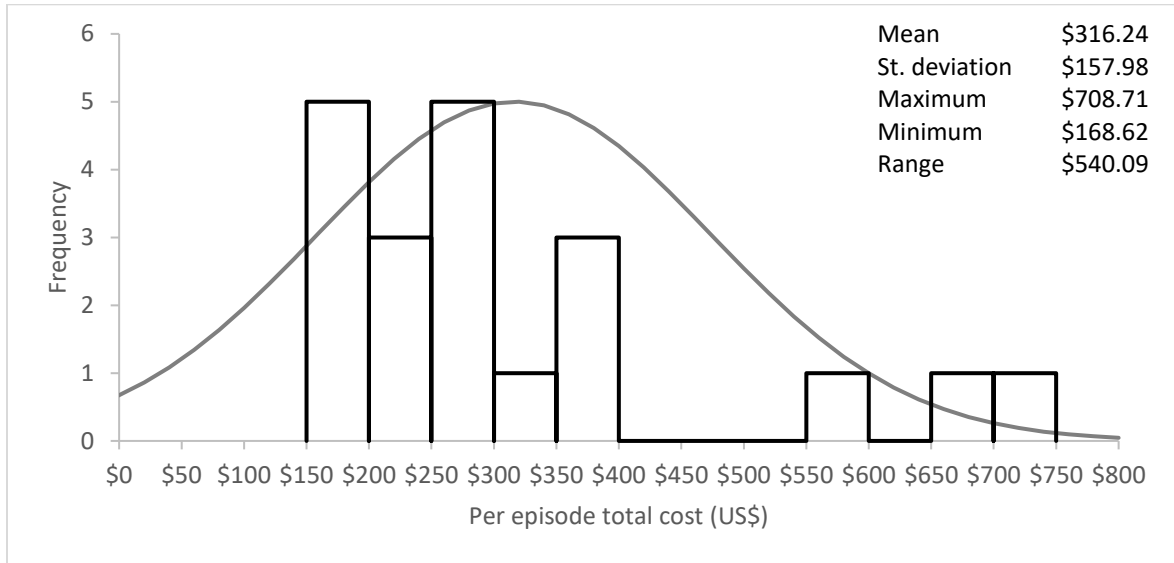

11

12 Notes: St. deviation denotes standard deviation; US\$ denotes United States dollars
